# Supplementary material
Source: PubMed Central journal article supplement (PMC10524330)

# Androgenic Steroids

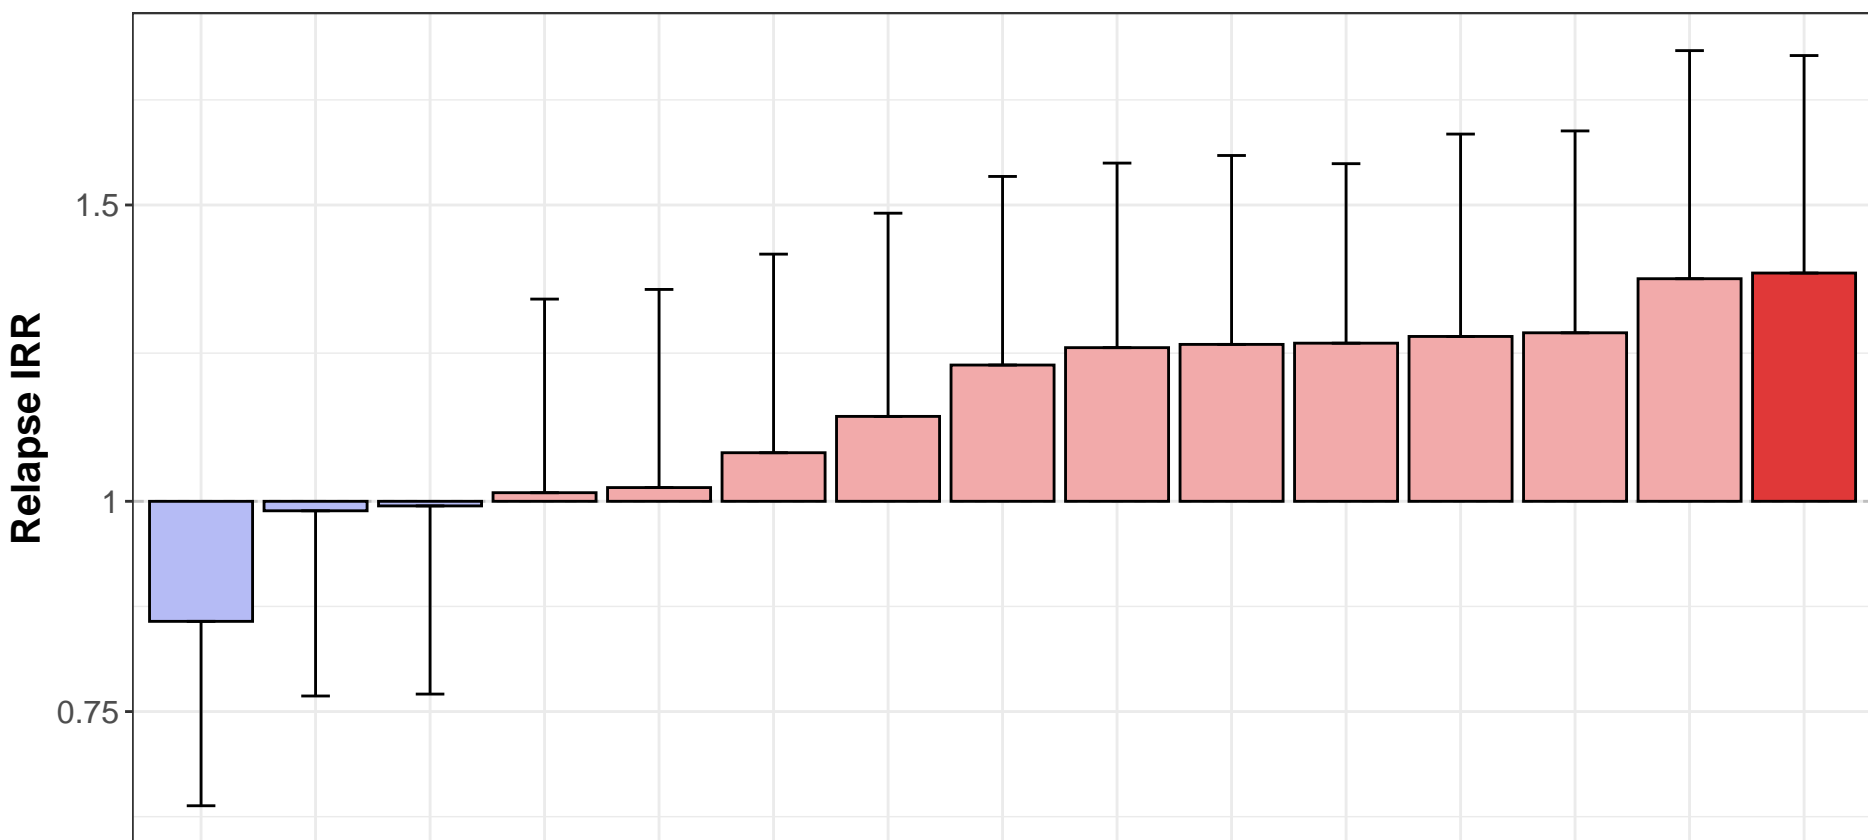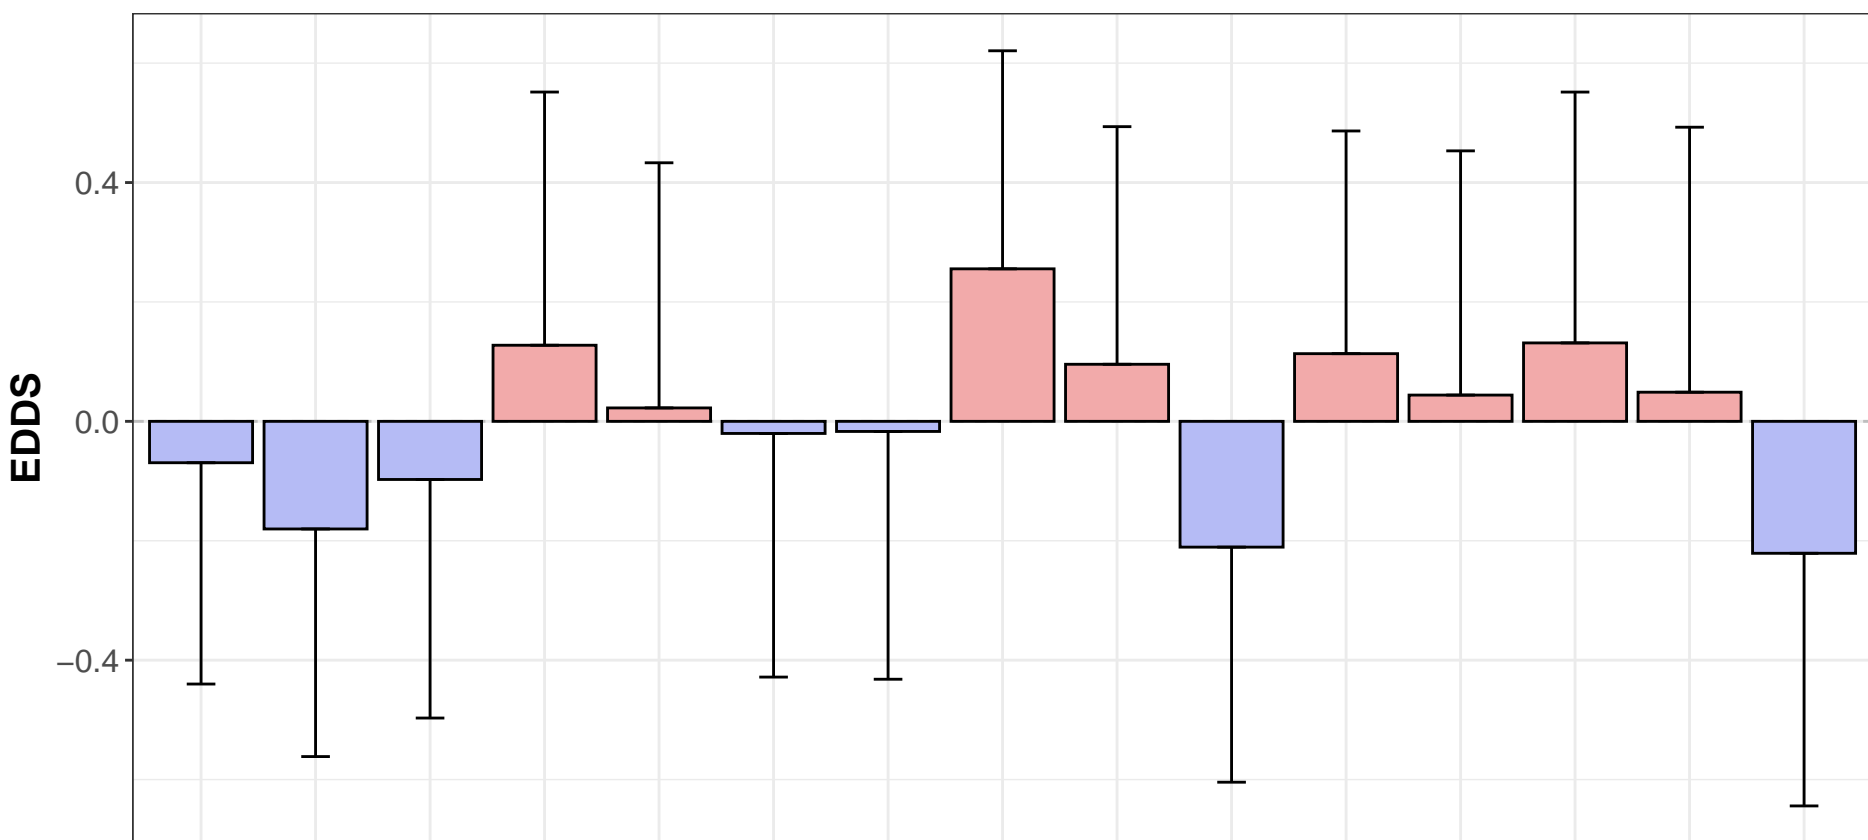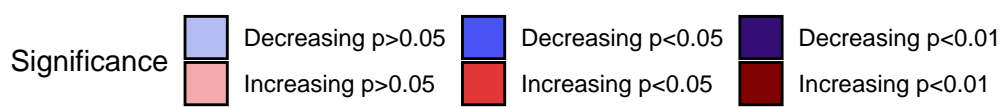

# Ceramides

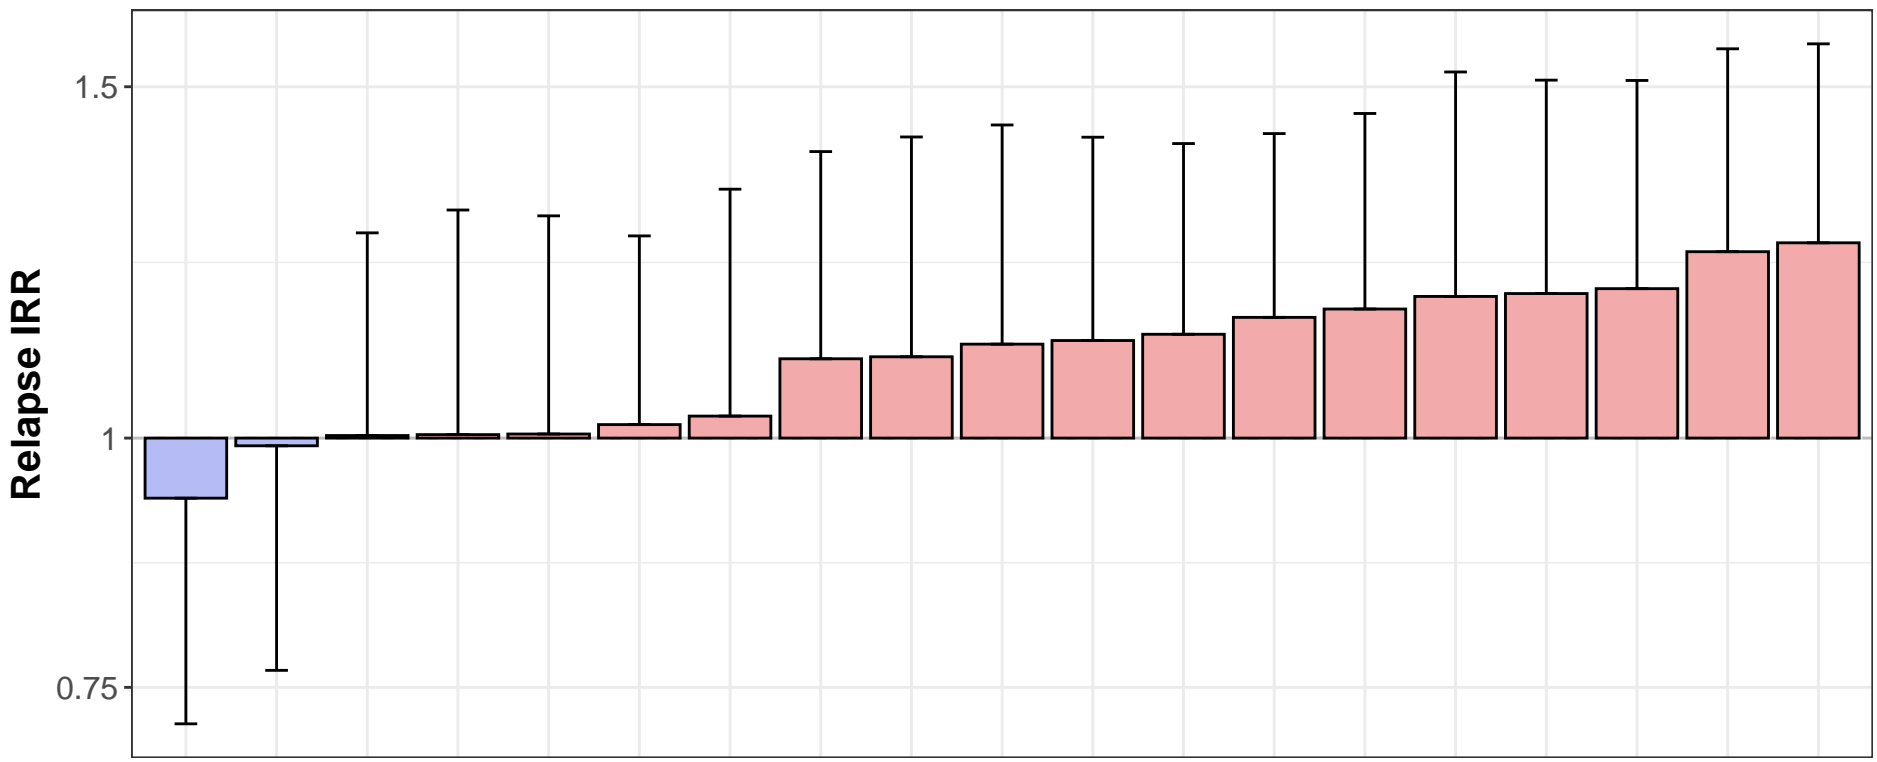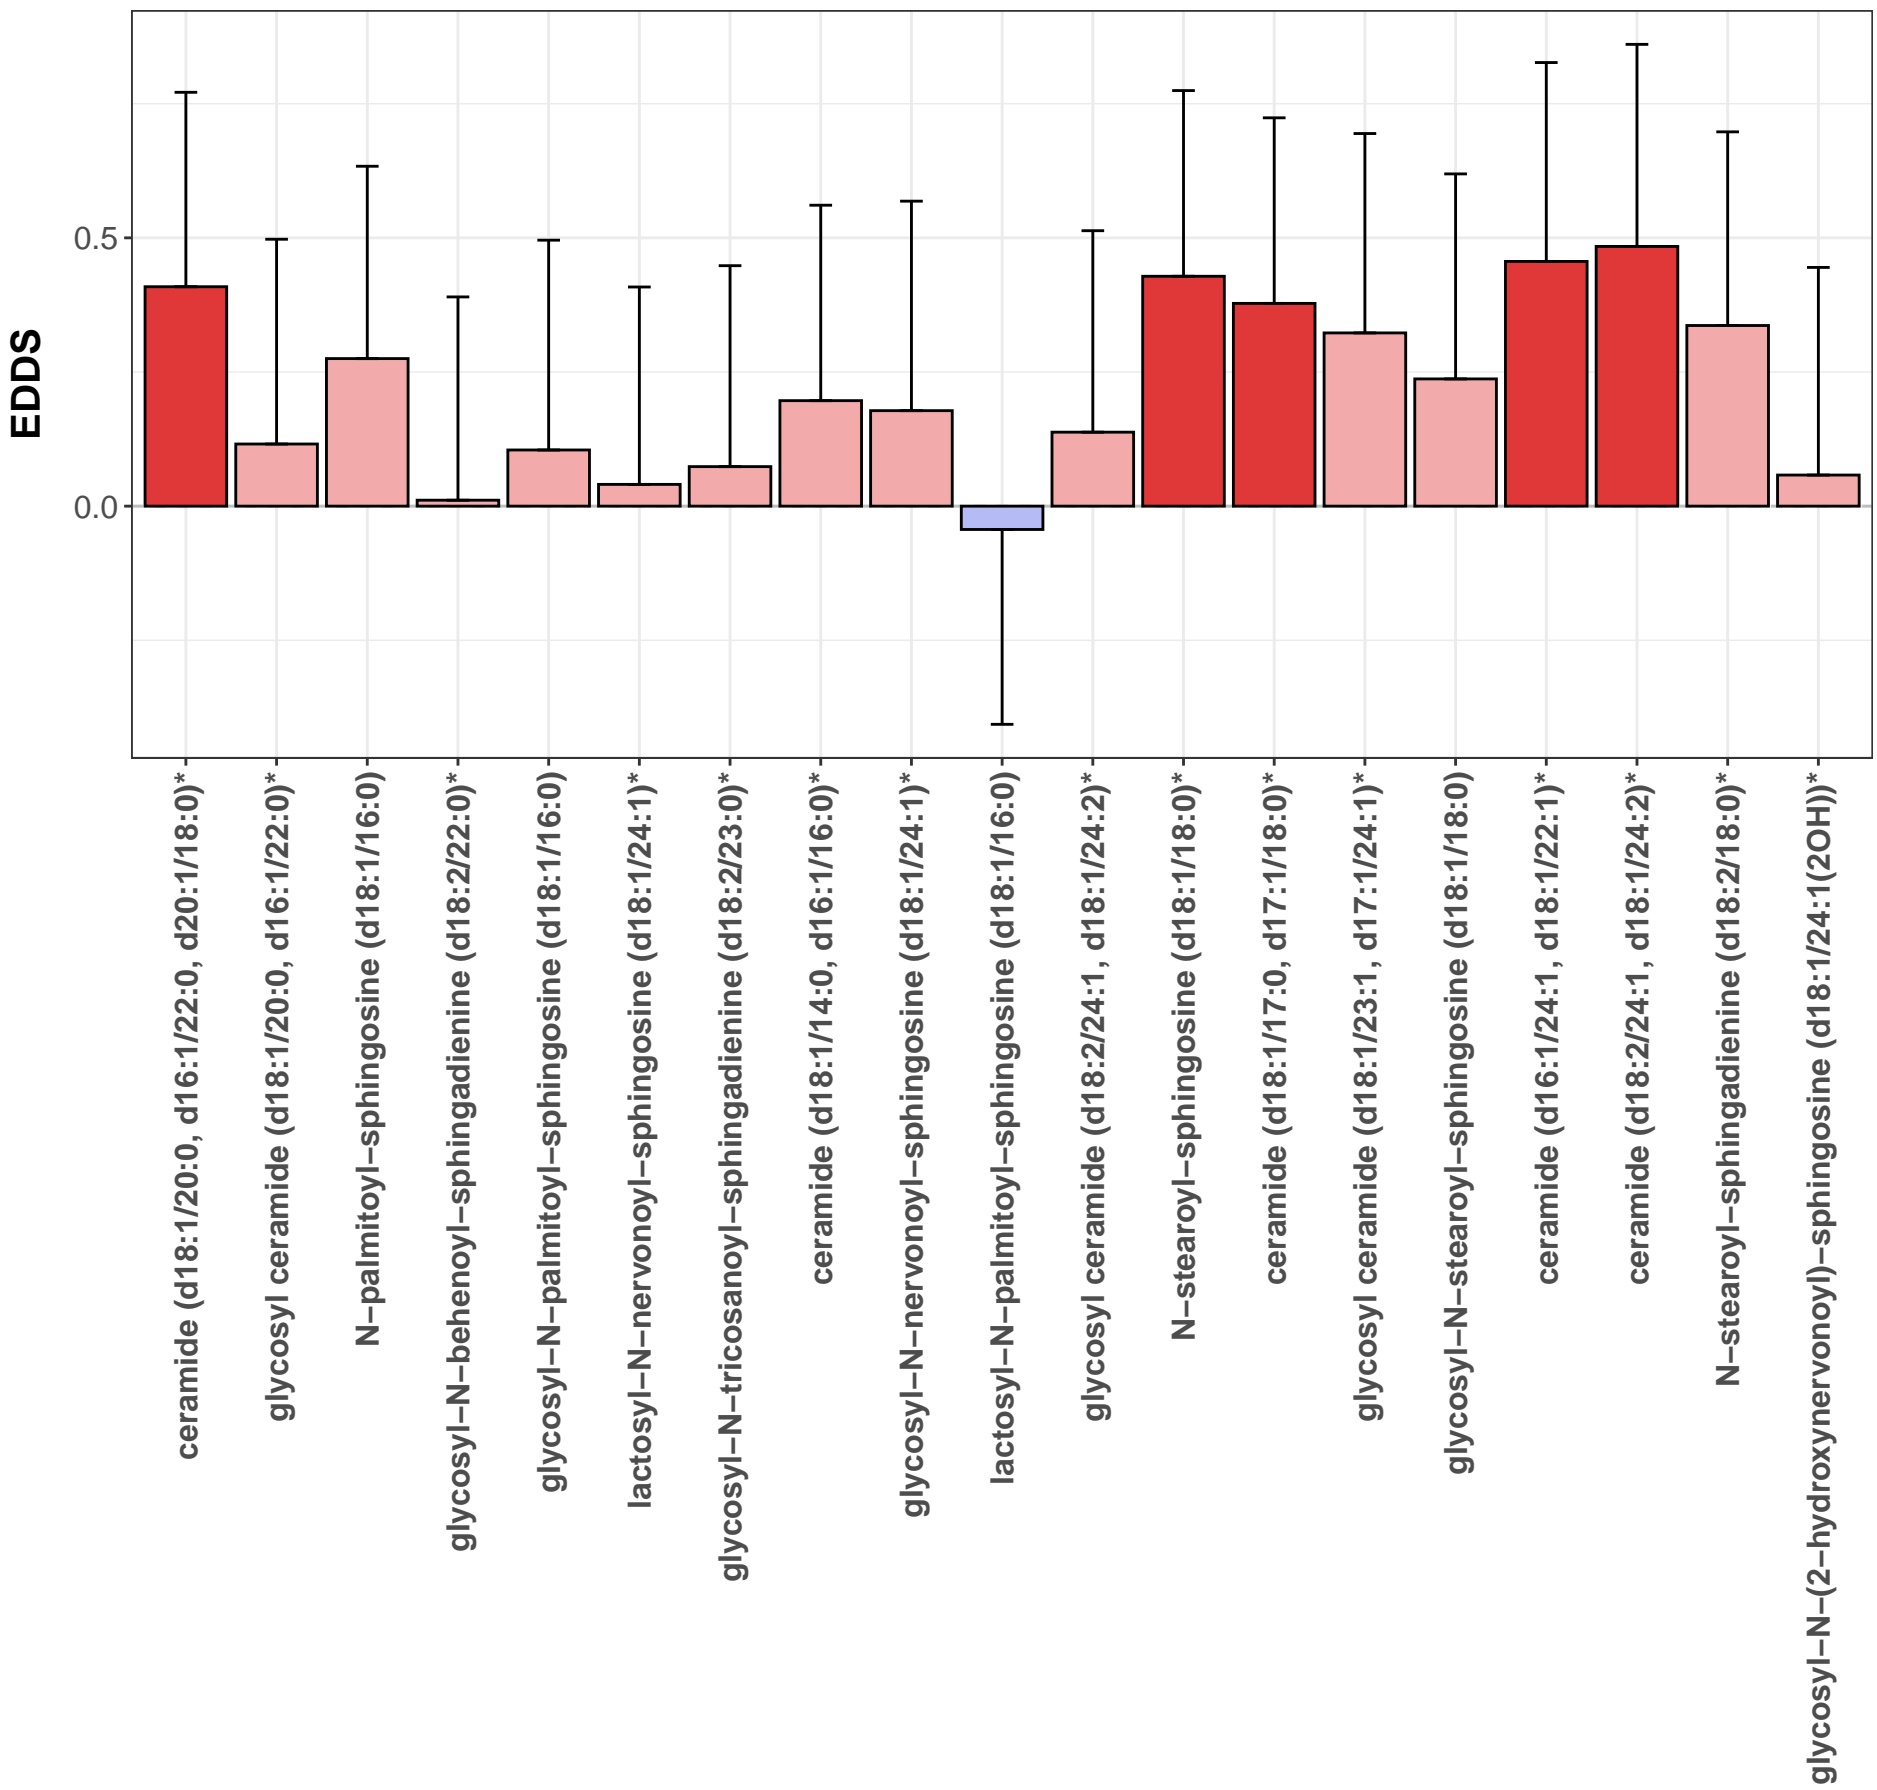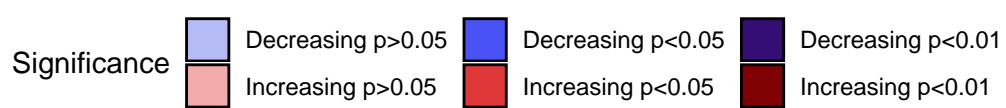

# Diacylglycerol

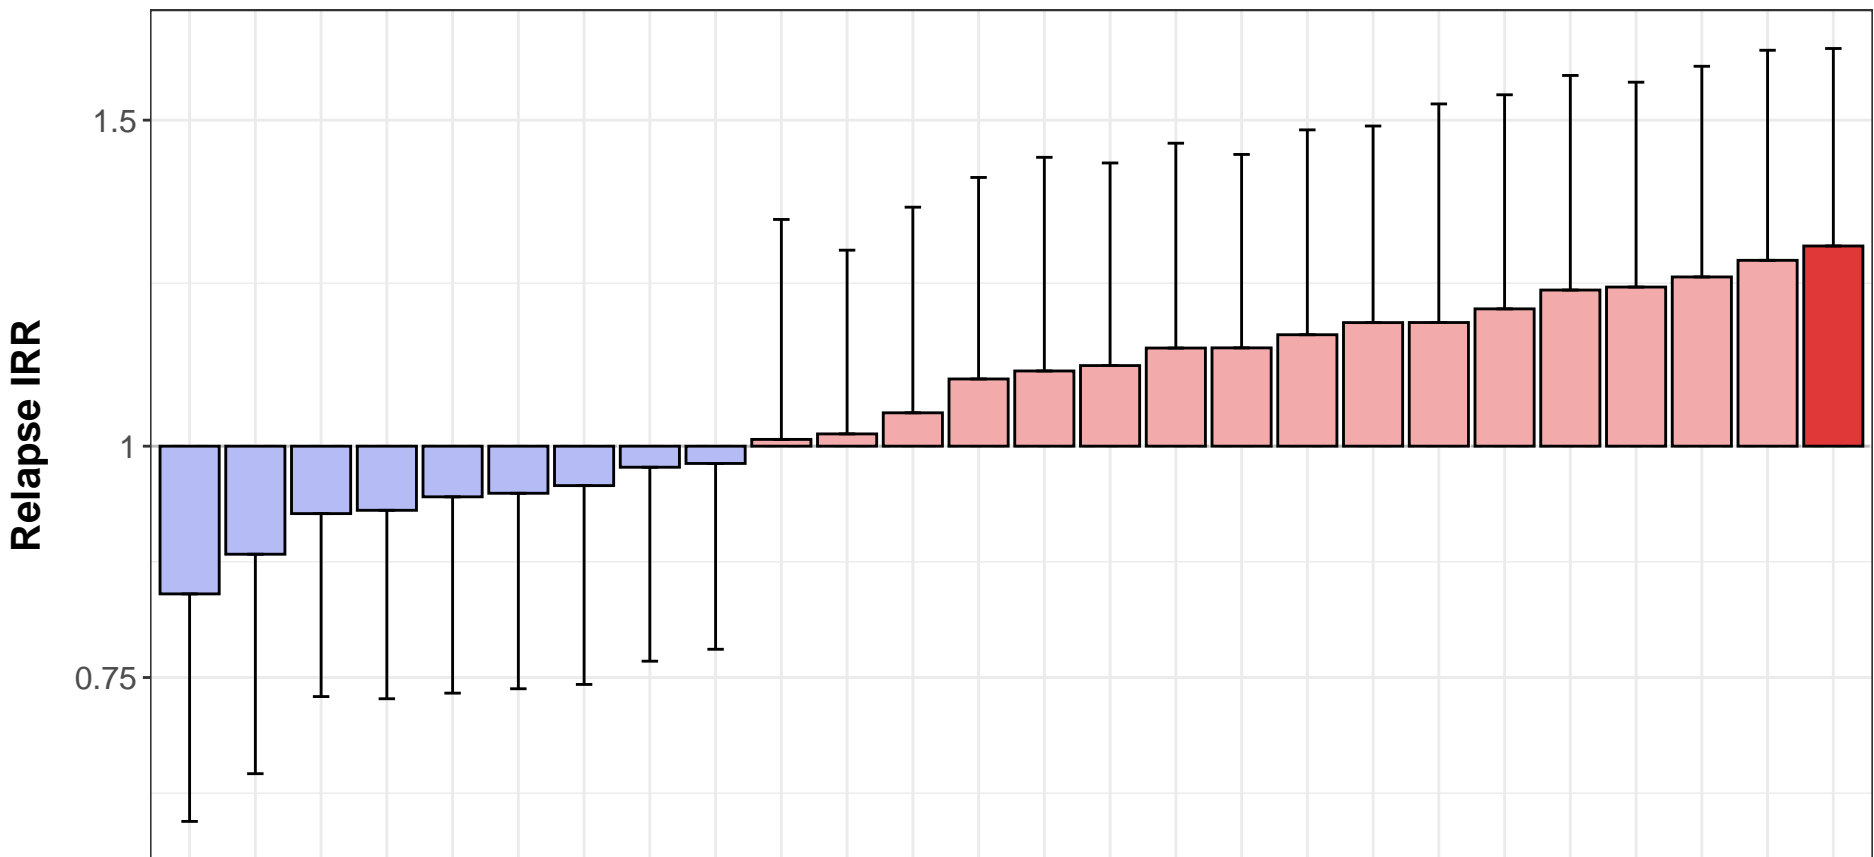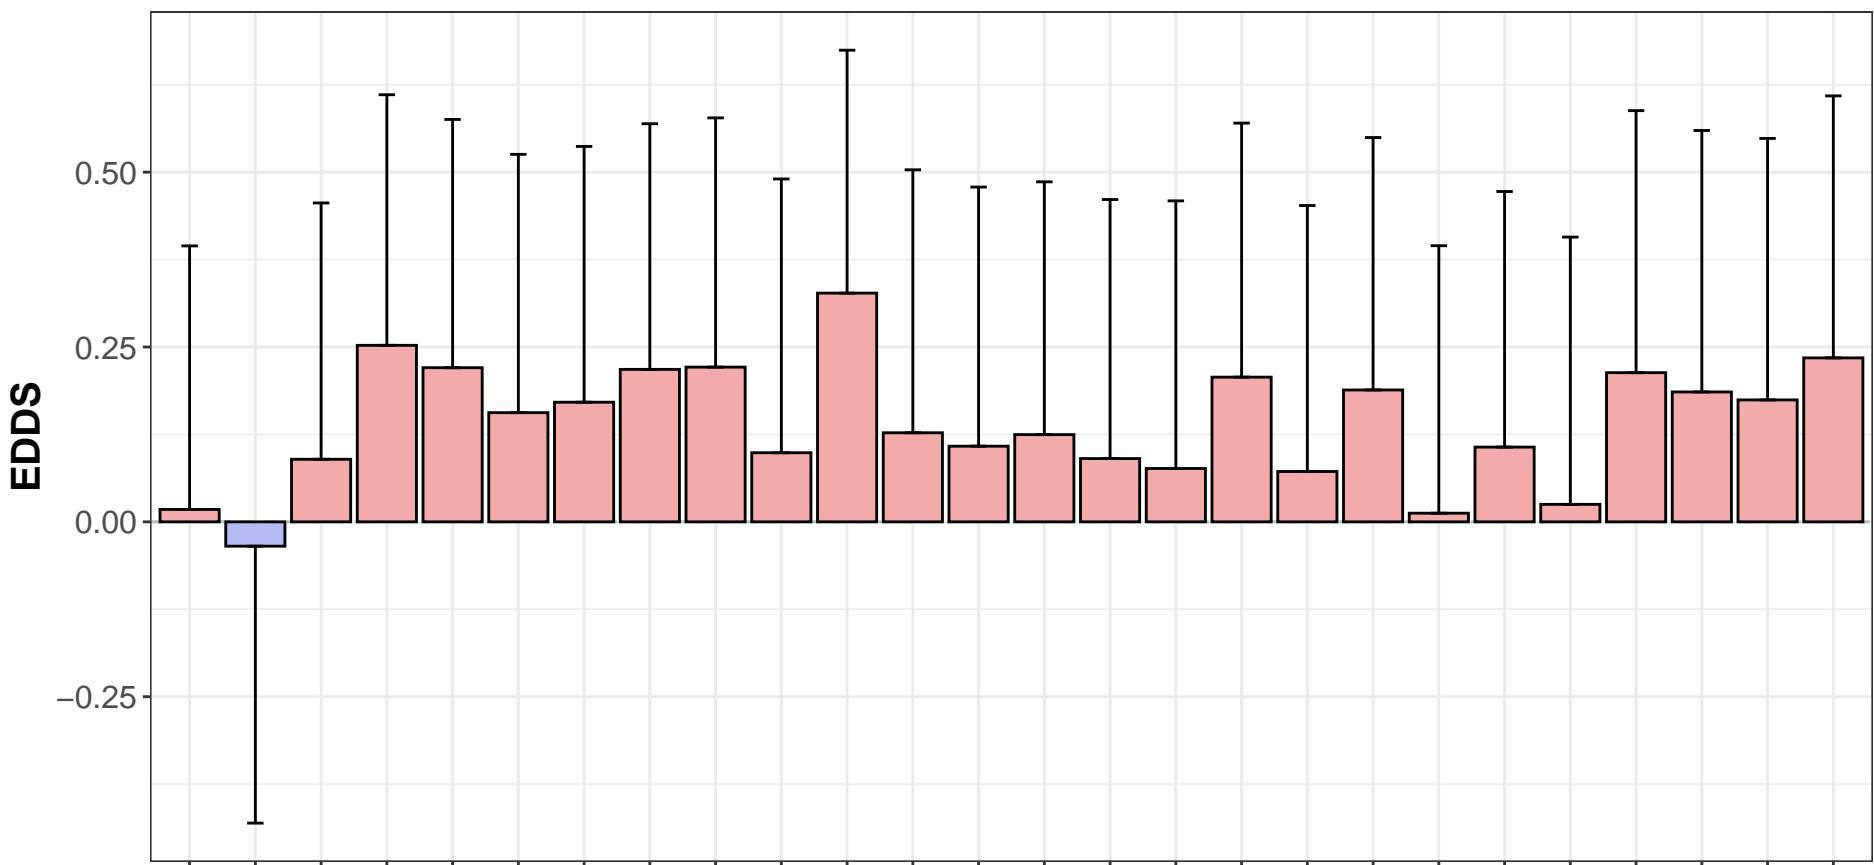

palmitoyl–arachidonoyl–glycerol (16:0/20:4) [1]\*  
 palmitoyl–palmitoyl–glycerol (16:0/16:0) [2]\*  
 palmitoyl–arachidonoyl–glycerol (16:0/20:4) [2]\*  
 linoleoyl–arachidonoyl–glycerol (18:2/20:4) [2]\*  
 palmitoleoyl–arachidonoyl–glycerol (16:1/20:4) [2]\*  
 stearoyl–arachidonoyl–glycerol (18:0/20:4) [2]\*  
 stearoyl–arachidonoyl–glycerol (18:0/20:4) [1]\*  
 oleoyl–arachidonoyl–glycerol (18:1/20:4) [1]\*  
 linoleoyl–arachidonoyl–glycerol (18:2/20:4) [1]\*  
 diacylglycerol (14:0/18:1, 16:0/16:1) [1]\*  
 oleoyl–arachidonoyl–glycerol (18:1/20:4) [2]\*  
 diacylglycerol (14:0/18:1, 16:0/16:1) [2]\*  
 palmitoyl–oleoyl–glycerol (16:0/18:1) [2]\*  
 oleoyl–linolenoyl–glycerol (18:1/18:3) [2]\*  
 palmitoyl–oleoyl–glycerol (16:0/18:1) [1]\*  
 palmitoyl–linoleoyl–glycerol (16:0/18:2) [2]\*  
 oleoyl–oleoyl–glycerol (18:1/18:1) [2]\*  
 palmitoyl–linoleoyl–glycerol (16:0/18:2) [1]\*  
 oleoyl–oleoyl–glycerol (18:1/18:1) [1]\*  
 linoleoyl–docosahexaenoyl–glycerol (18:2/22:6) [2]\*  
 linoleoyl–linolenoyl–glycerol (18:2/18:3) [2]\*  
 linoleoyl–linoleoyl–glycerol (18:2/18:2) [1]\*  
 diacylglycerol (16:1/18:2 [2], 16:0/18:3 [1]) [1]\*  
 oleoyl–linoleoyl–glycerol (18:1/18:2) [2]  
 oleoyl–linoleoyl–glycerol (18:1/18:2) [1]  
 palmitoleoyl–linoleoyl–glycerol (16:1/18:2) [1]\*

Significance  
 Decreasing p>0.05    Decreasing p<0.05    Decreasing p<0.01  
 Increasing p>0.05    Increasing p<0.05    Increasing p<0.01

# Endocannabinoid

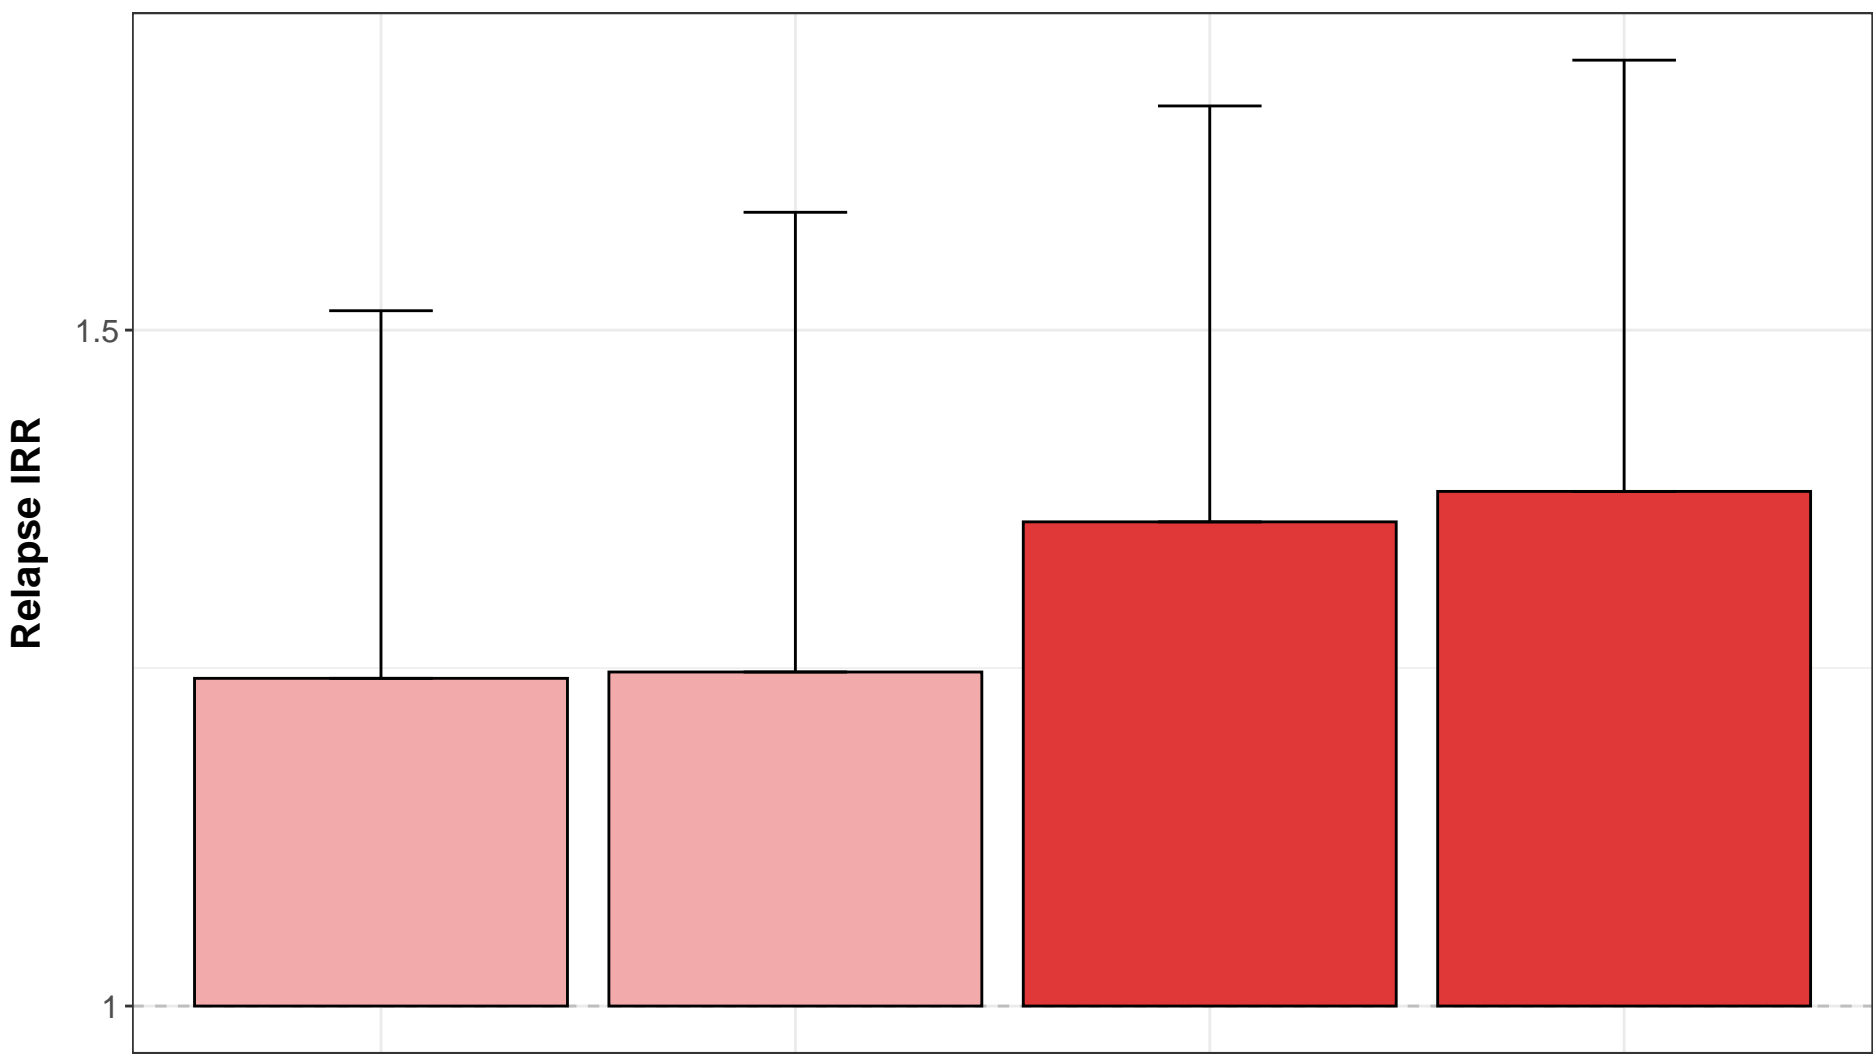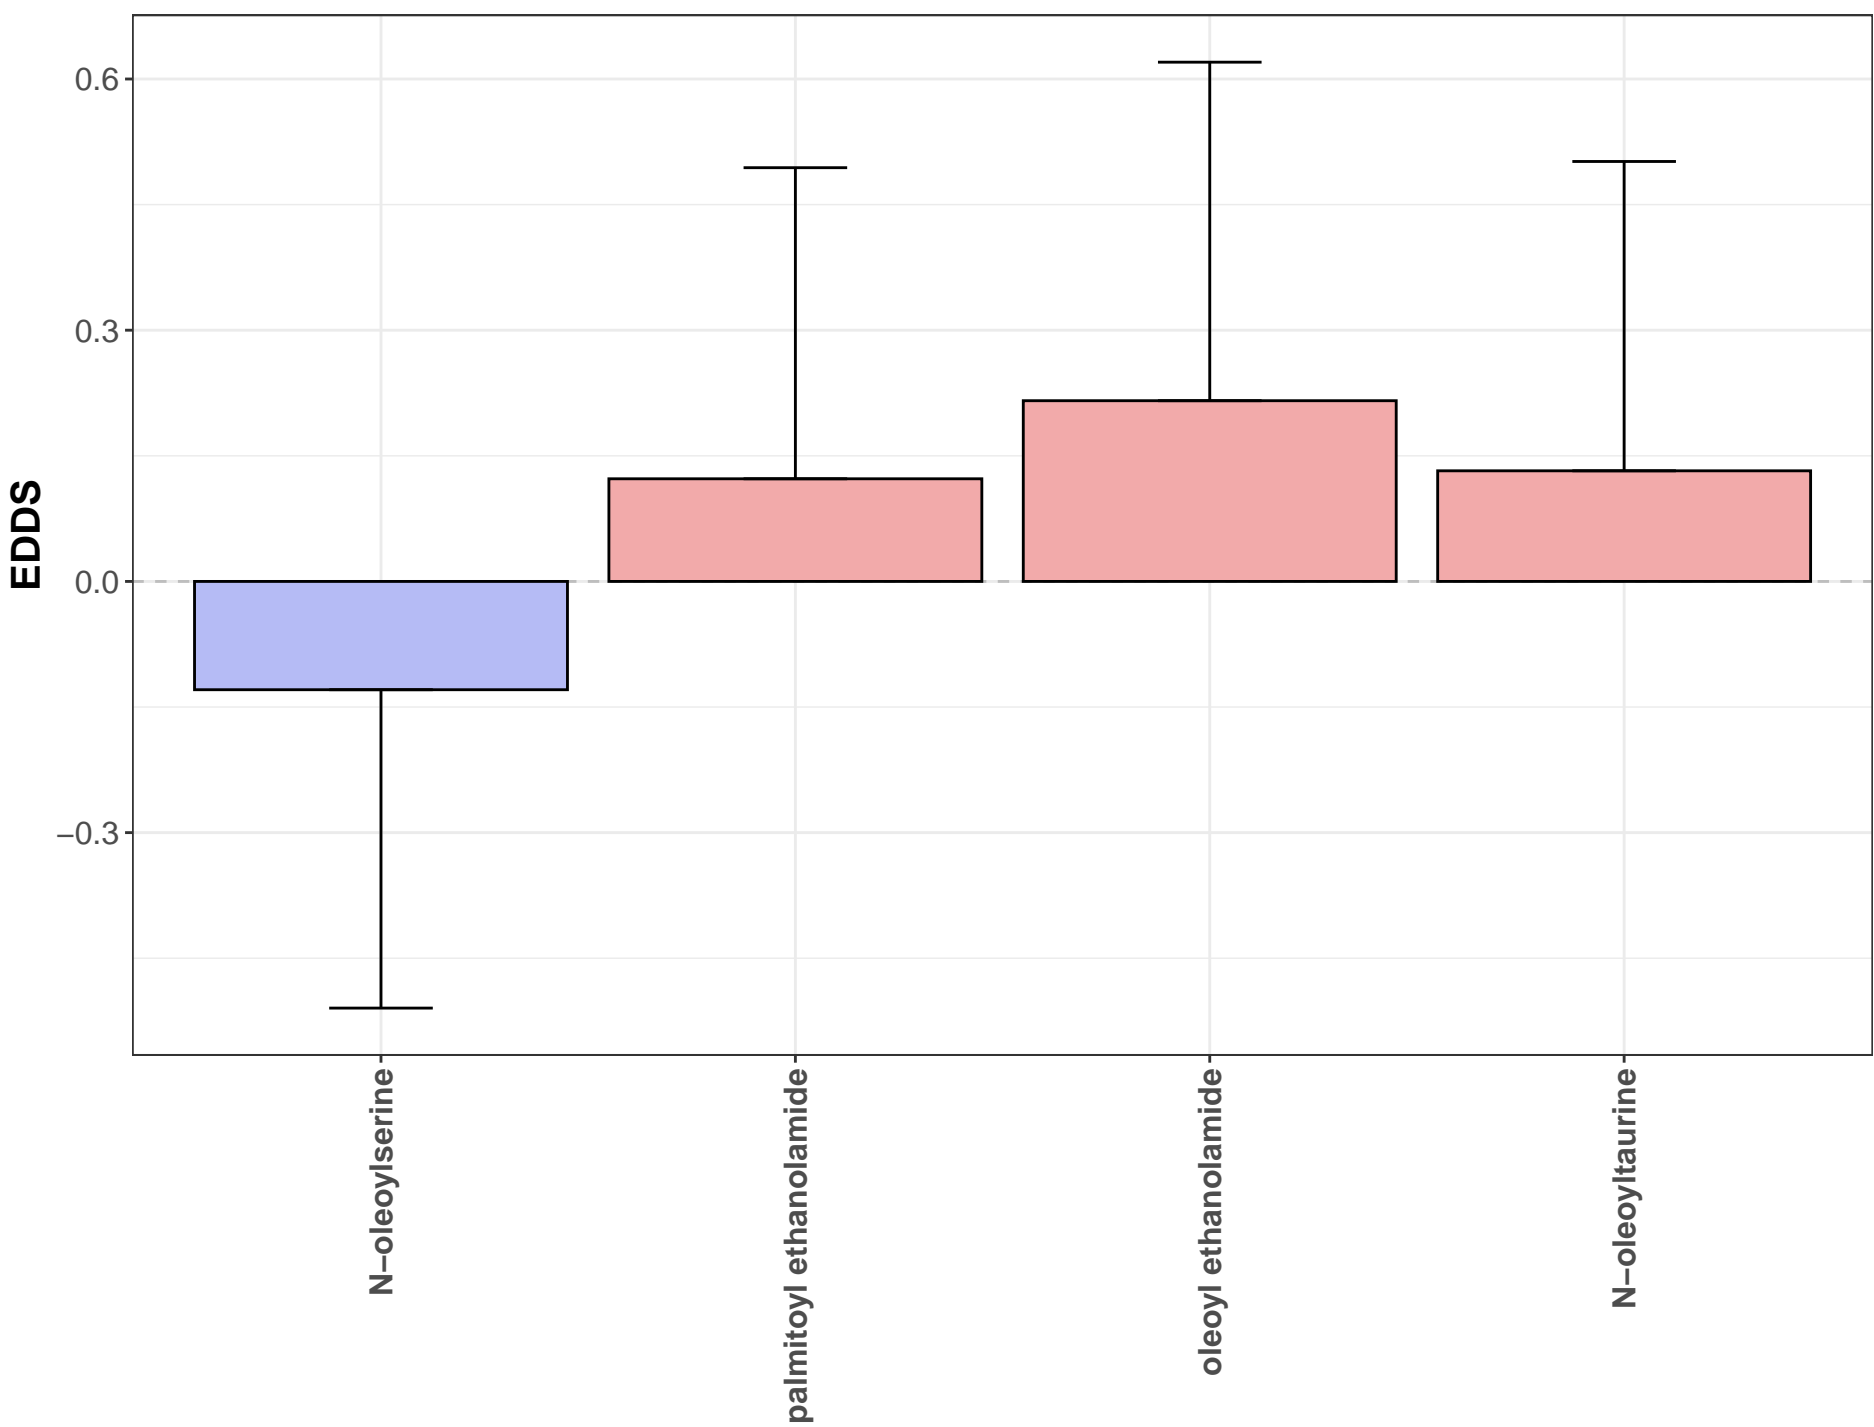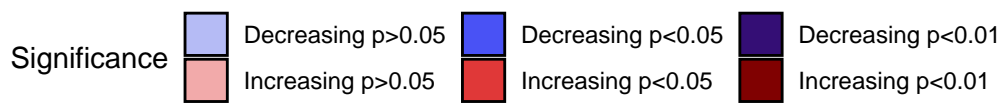

# Fatty Acid Metabolism (Acyl Choline)

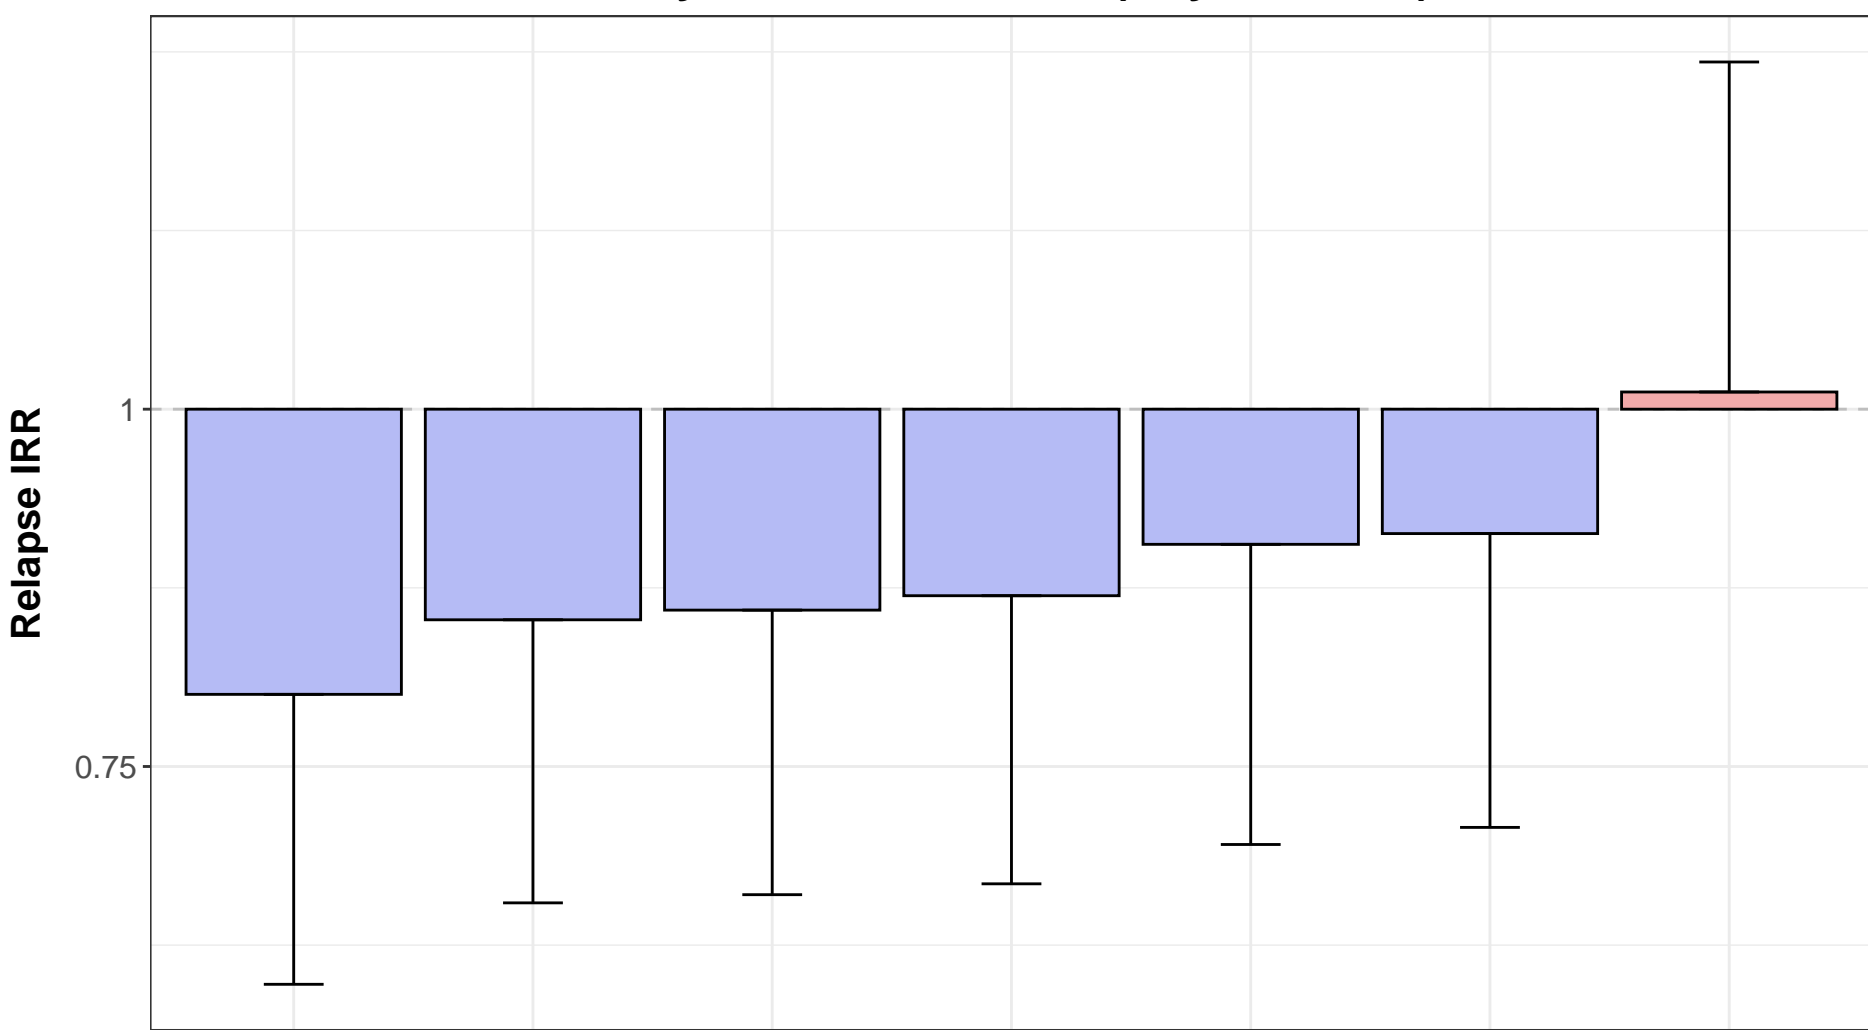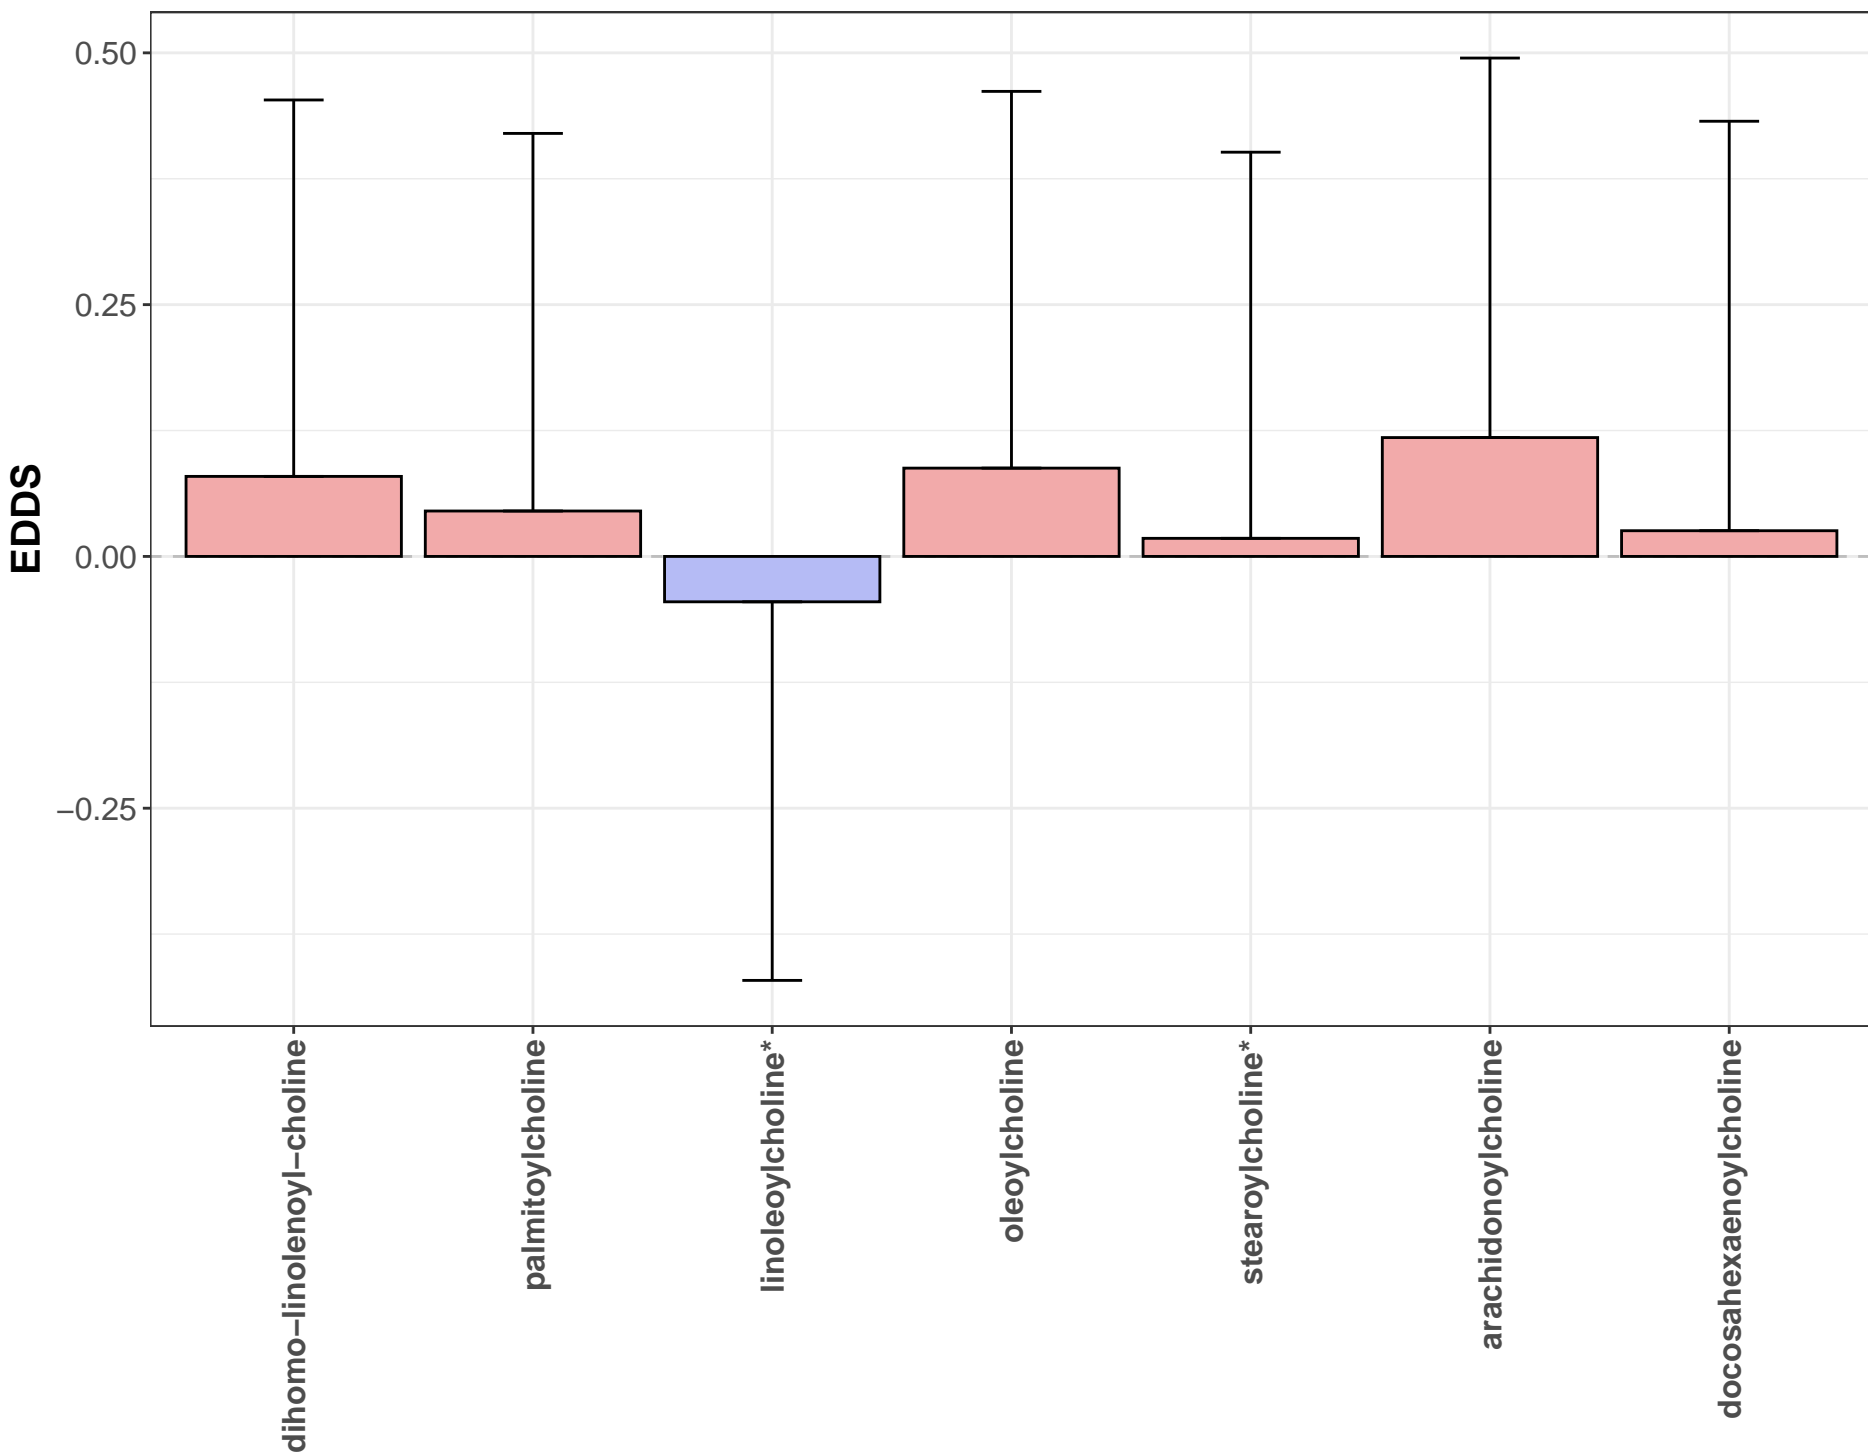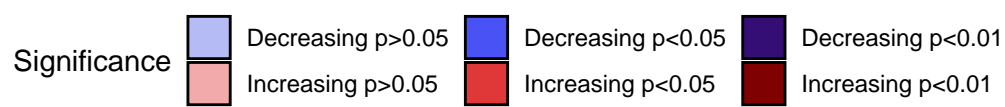

# Fatty Acid Metabolism(Acyl Carnitine)

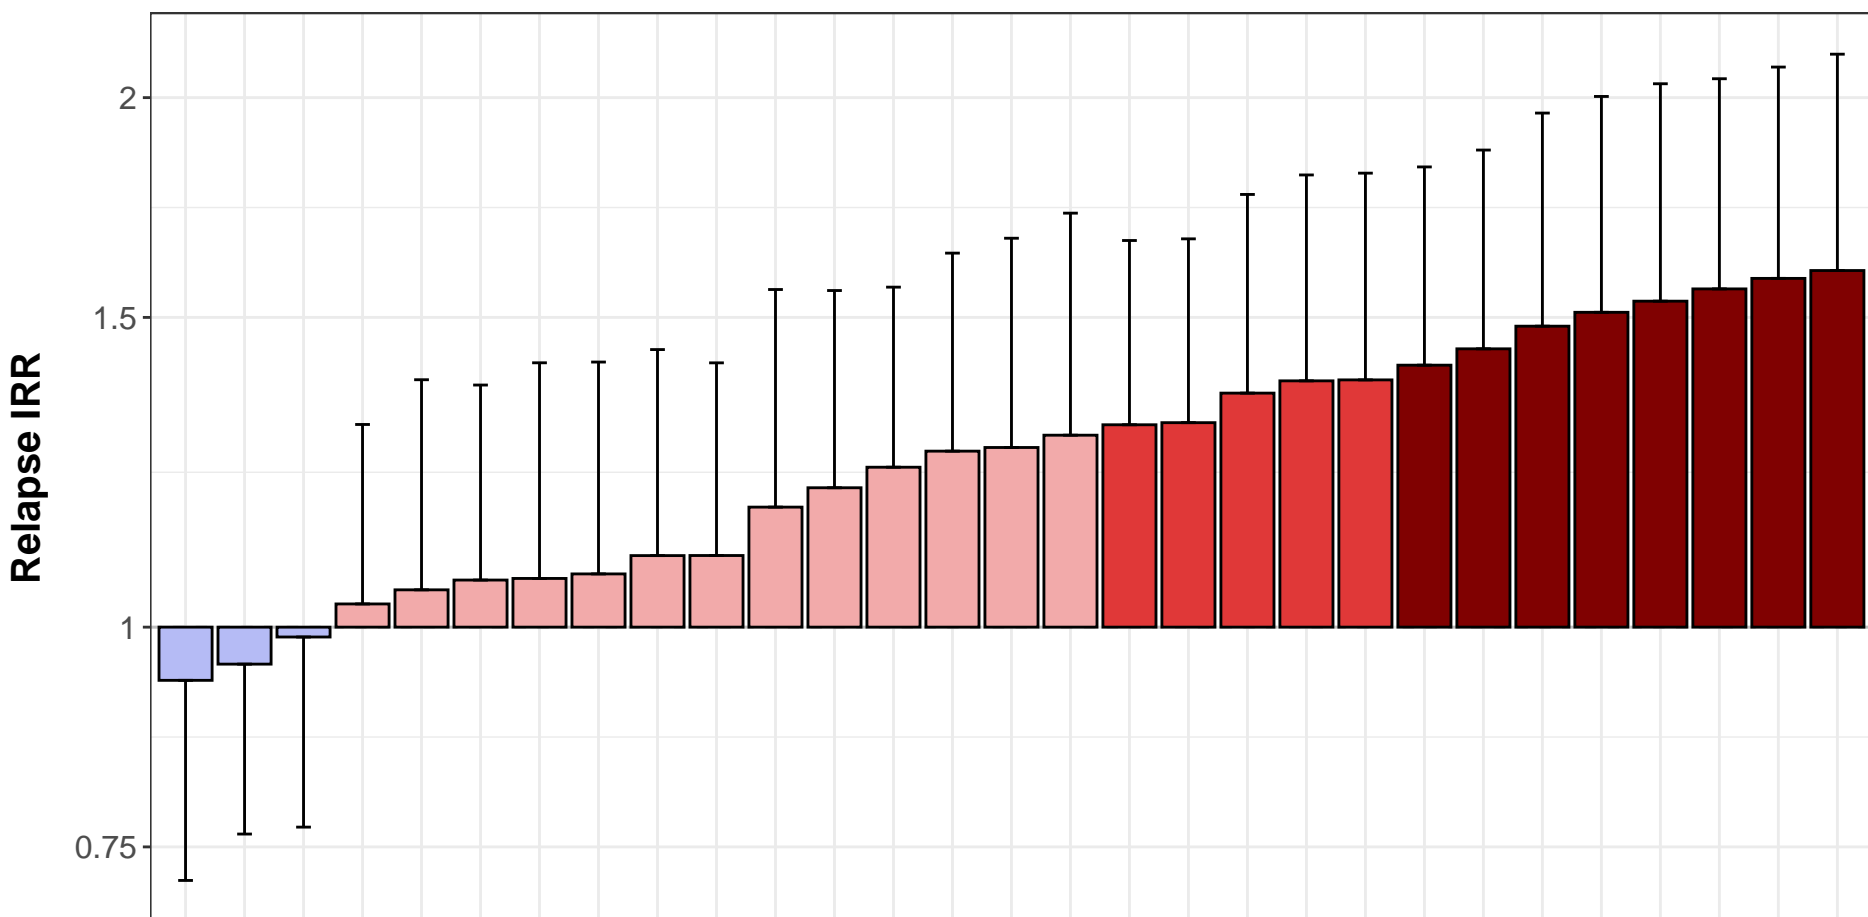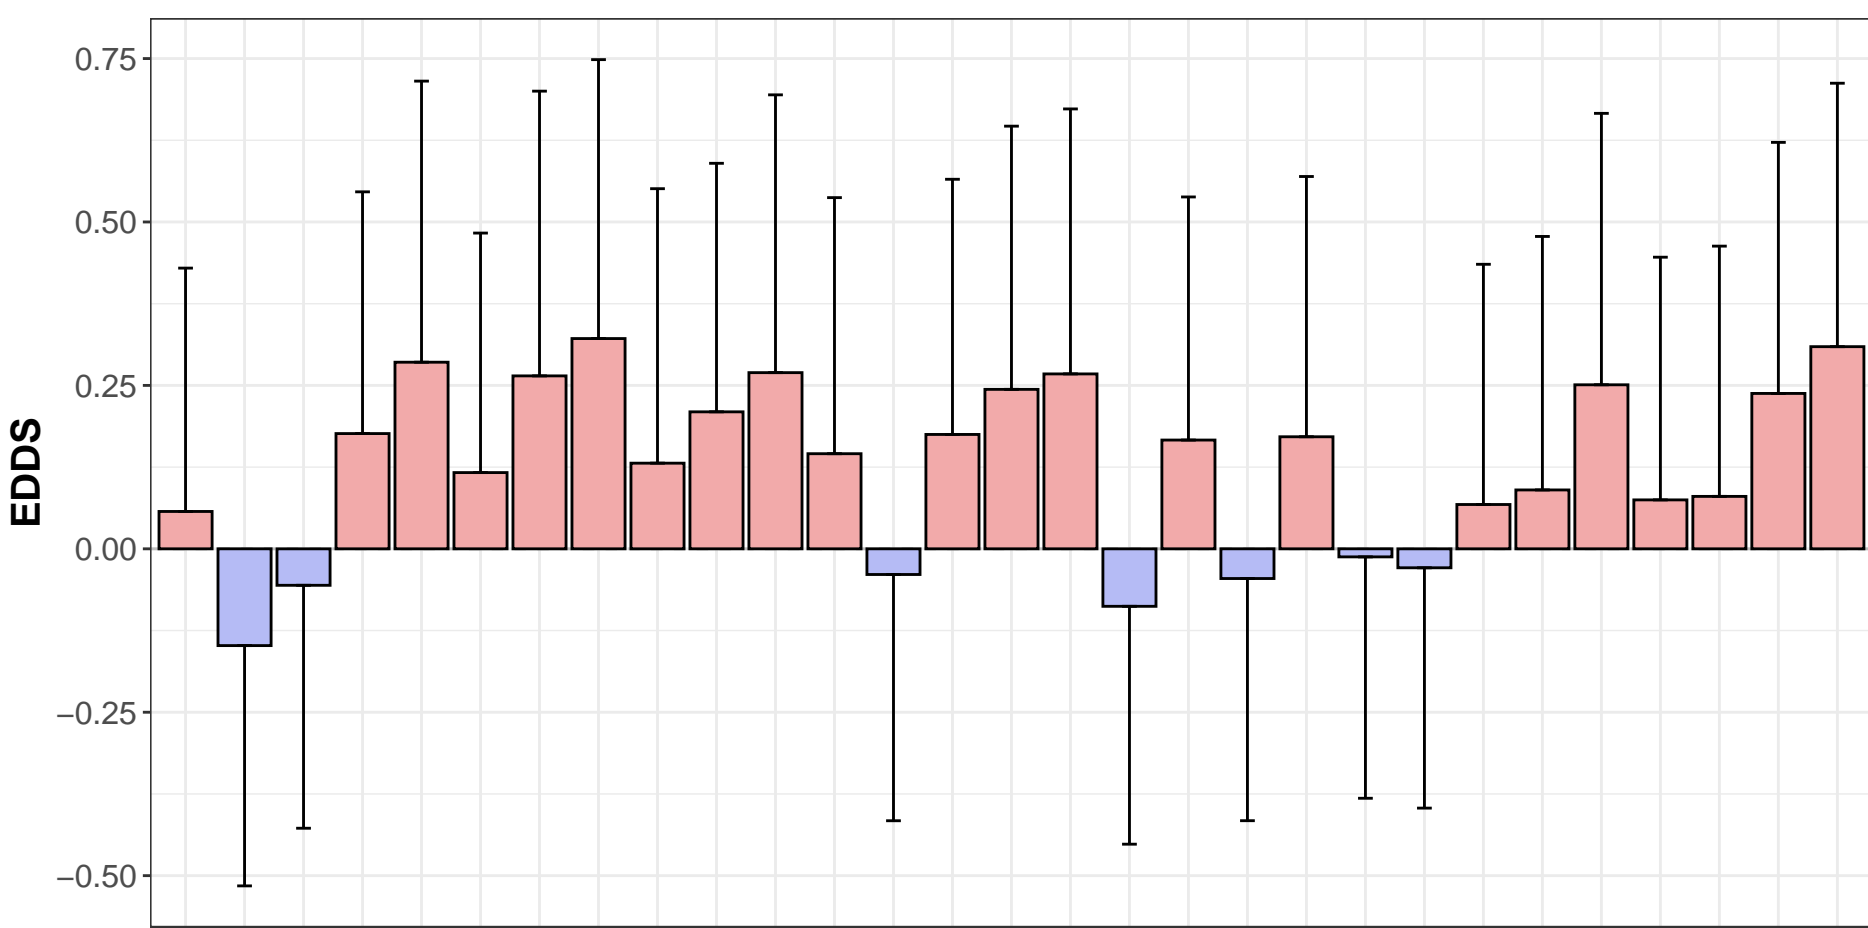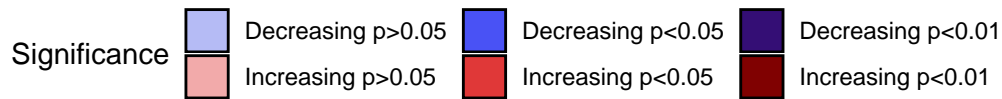

# Fatty Acid, Dicarboxylate

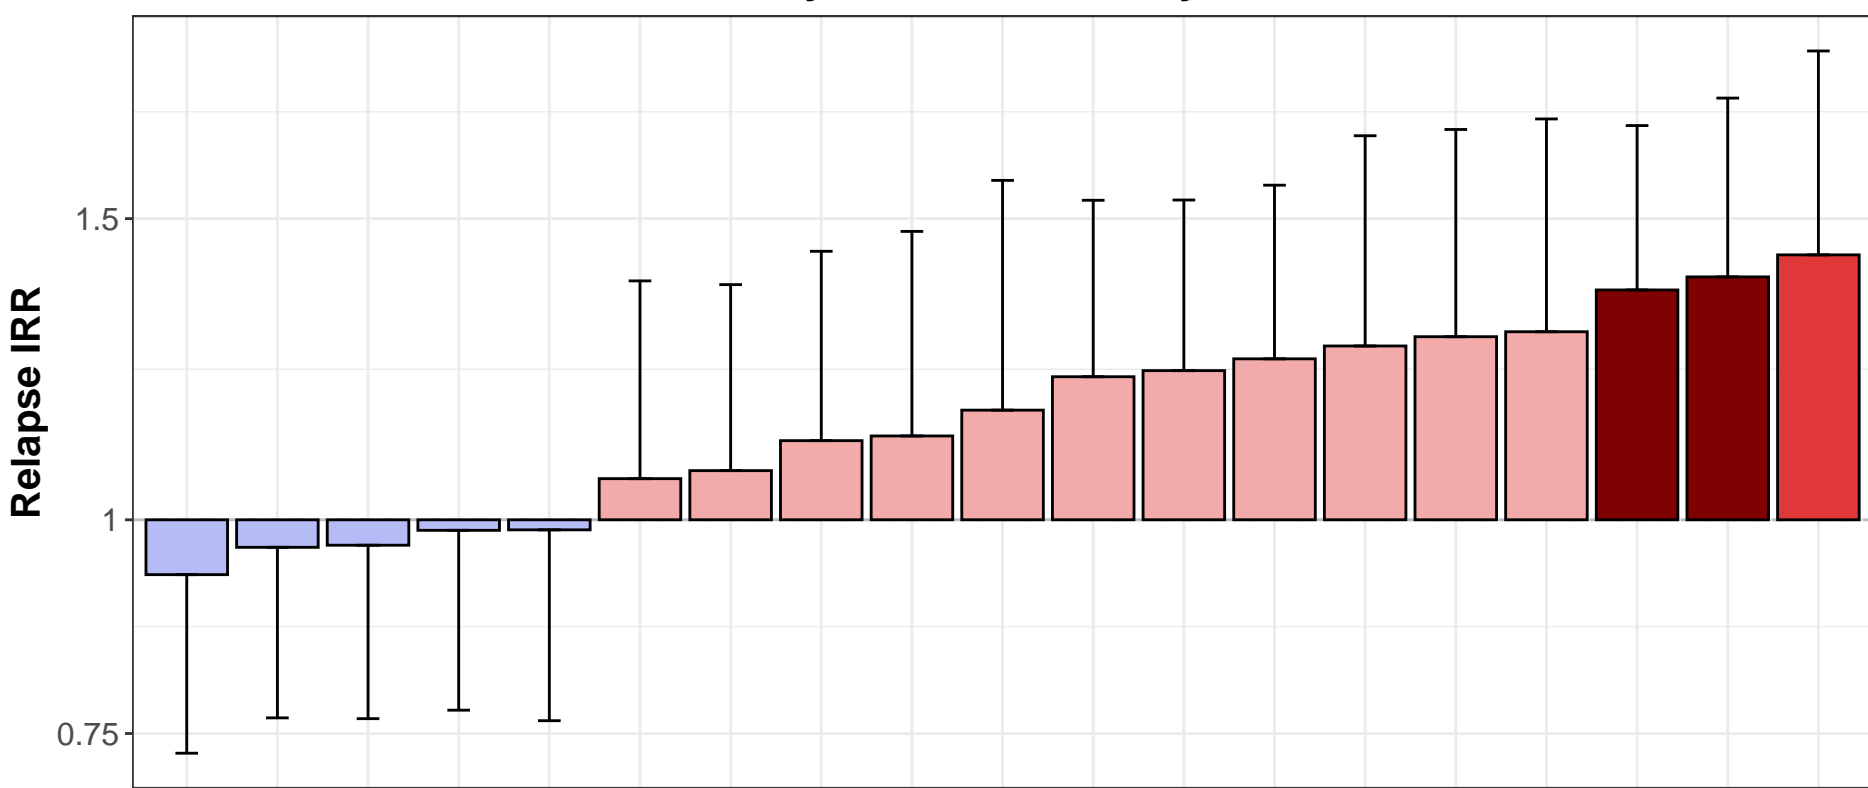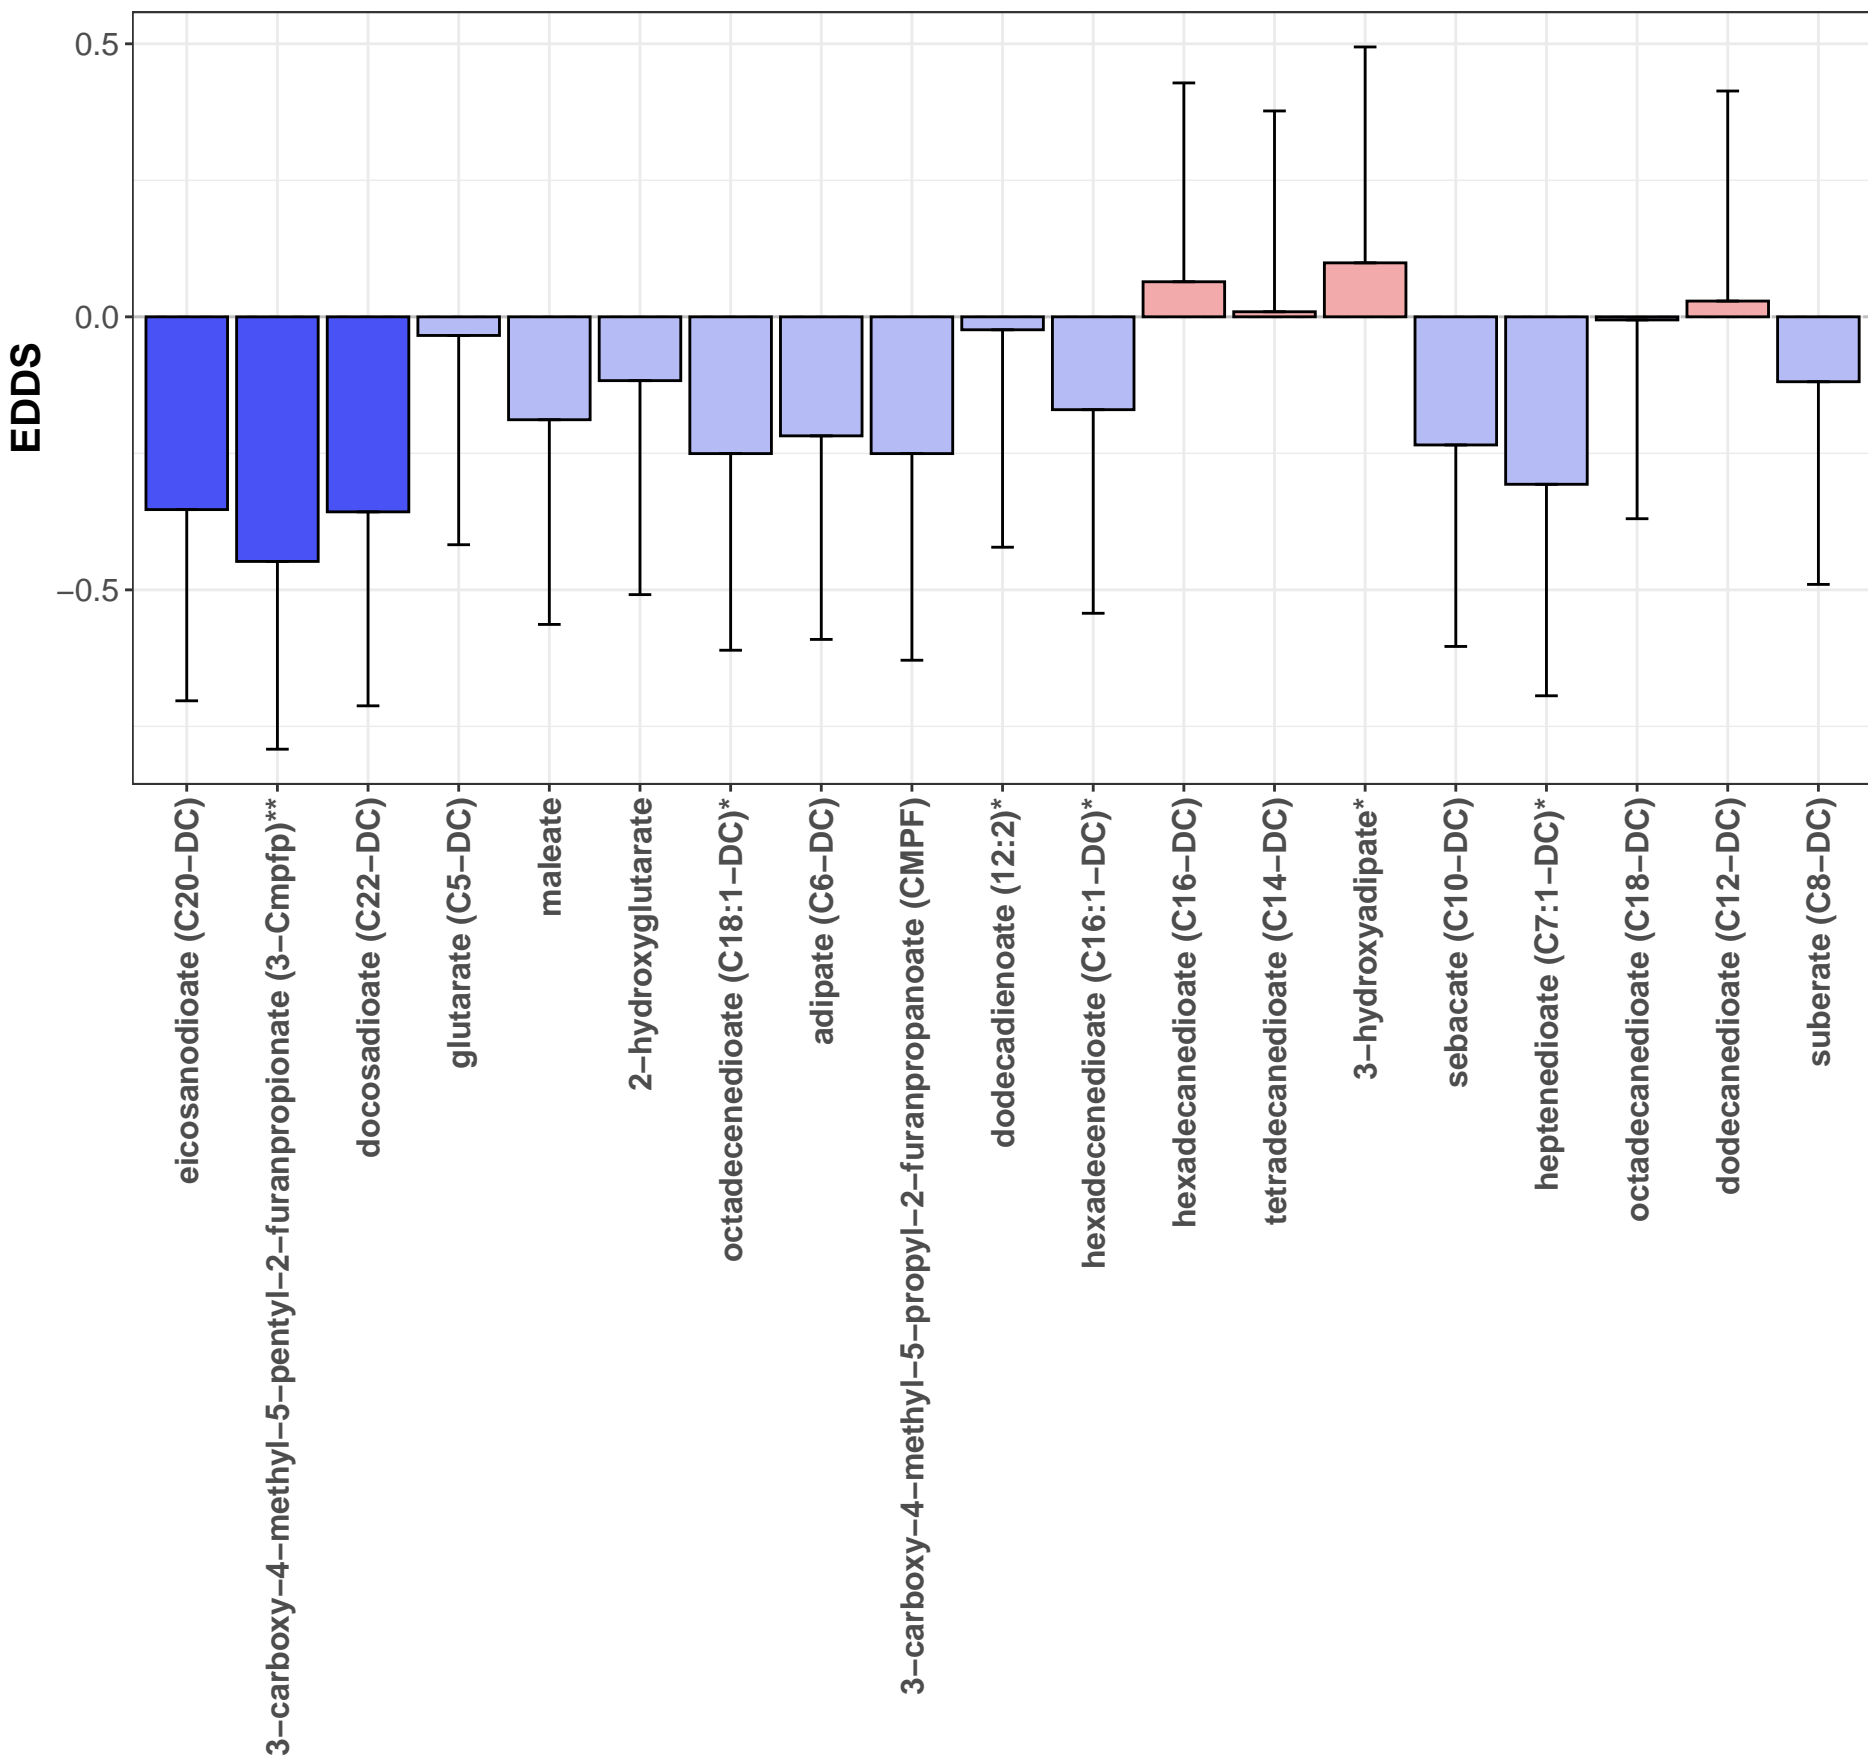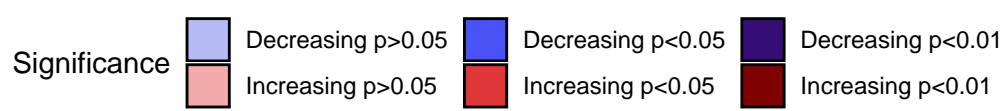

# Fatty Acid, Monohydroxy

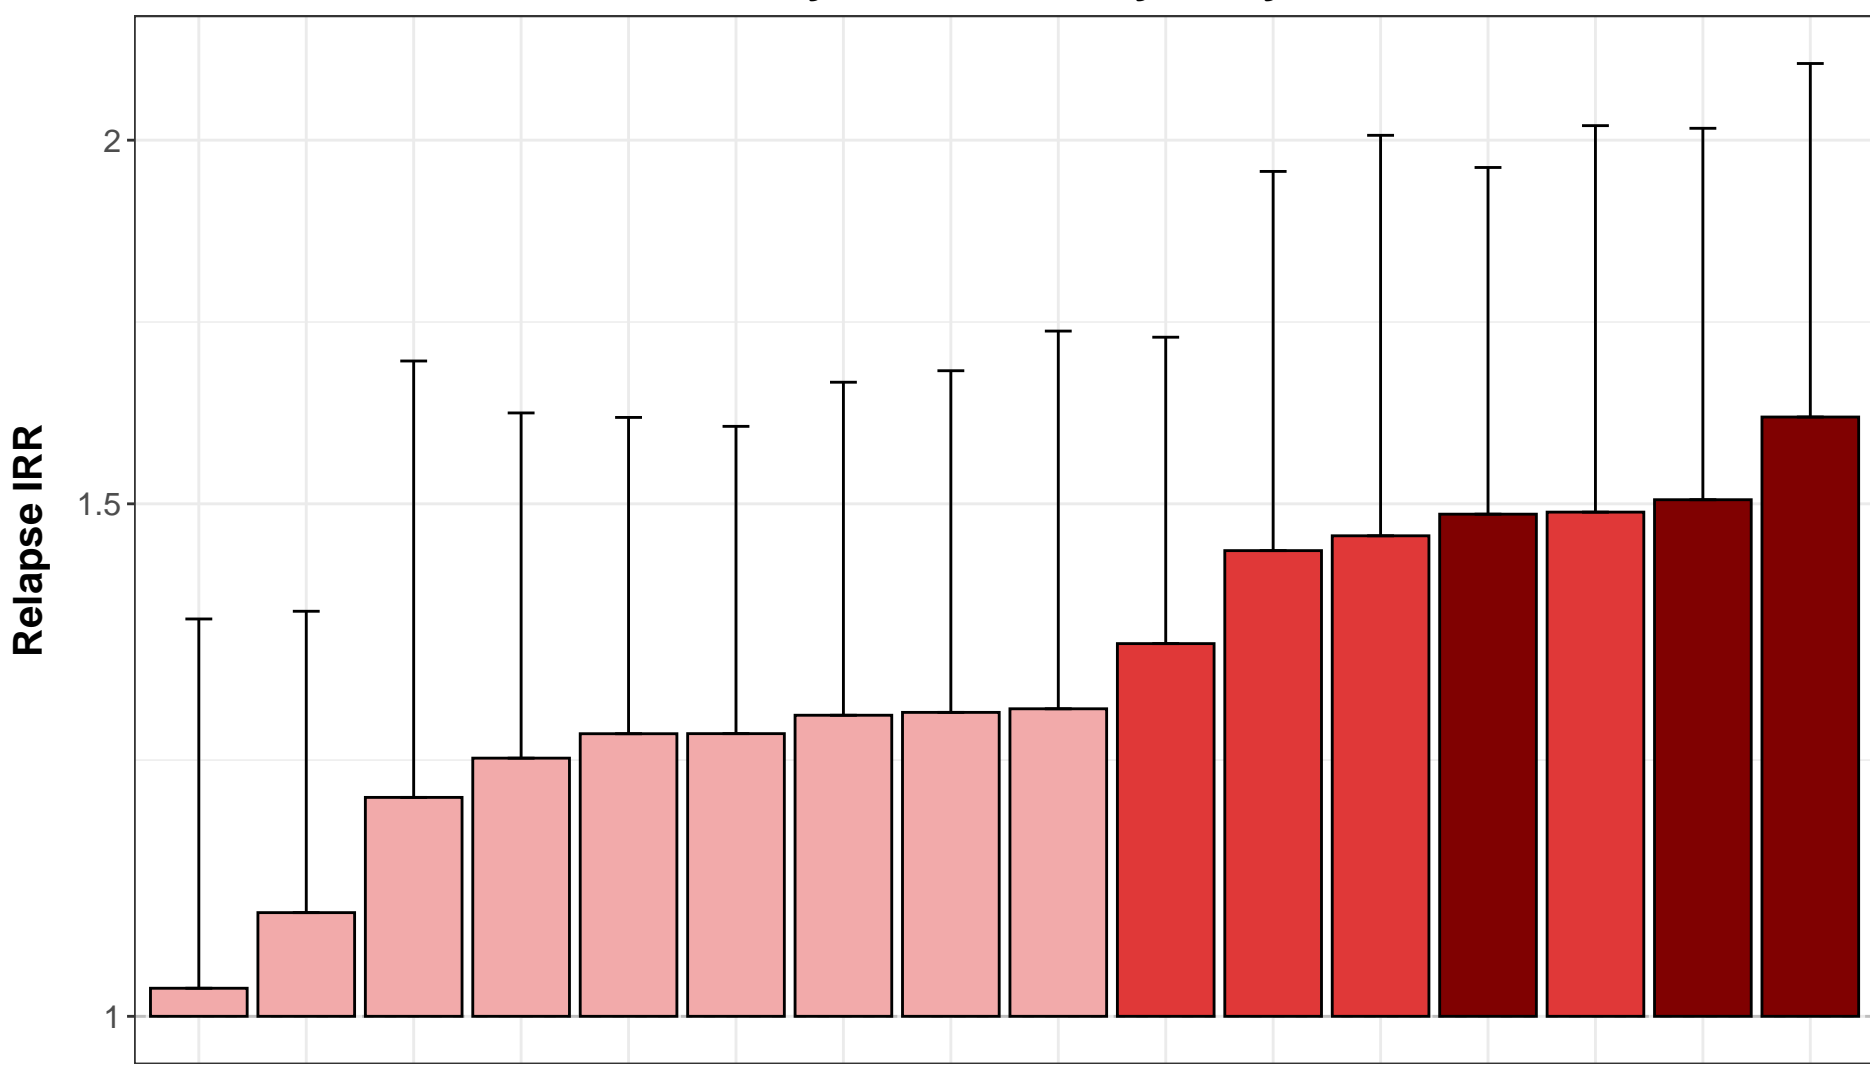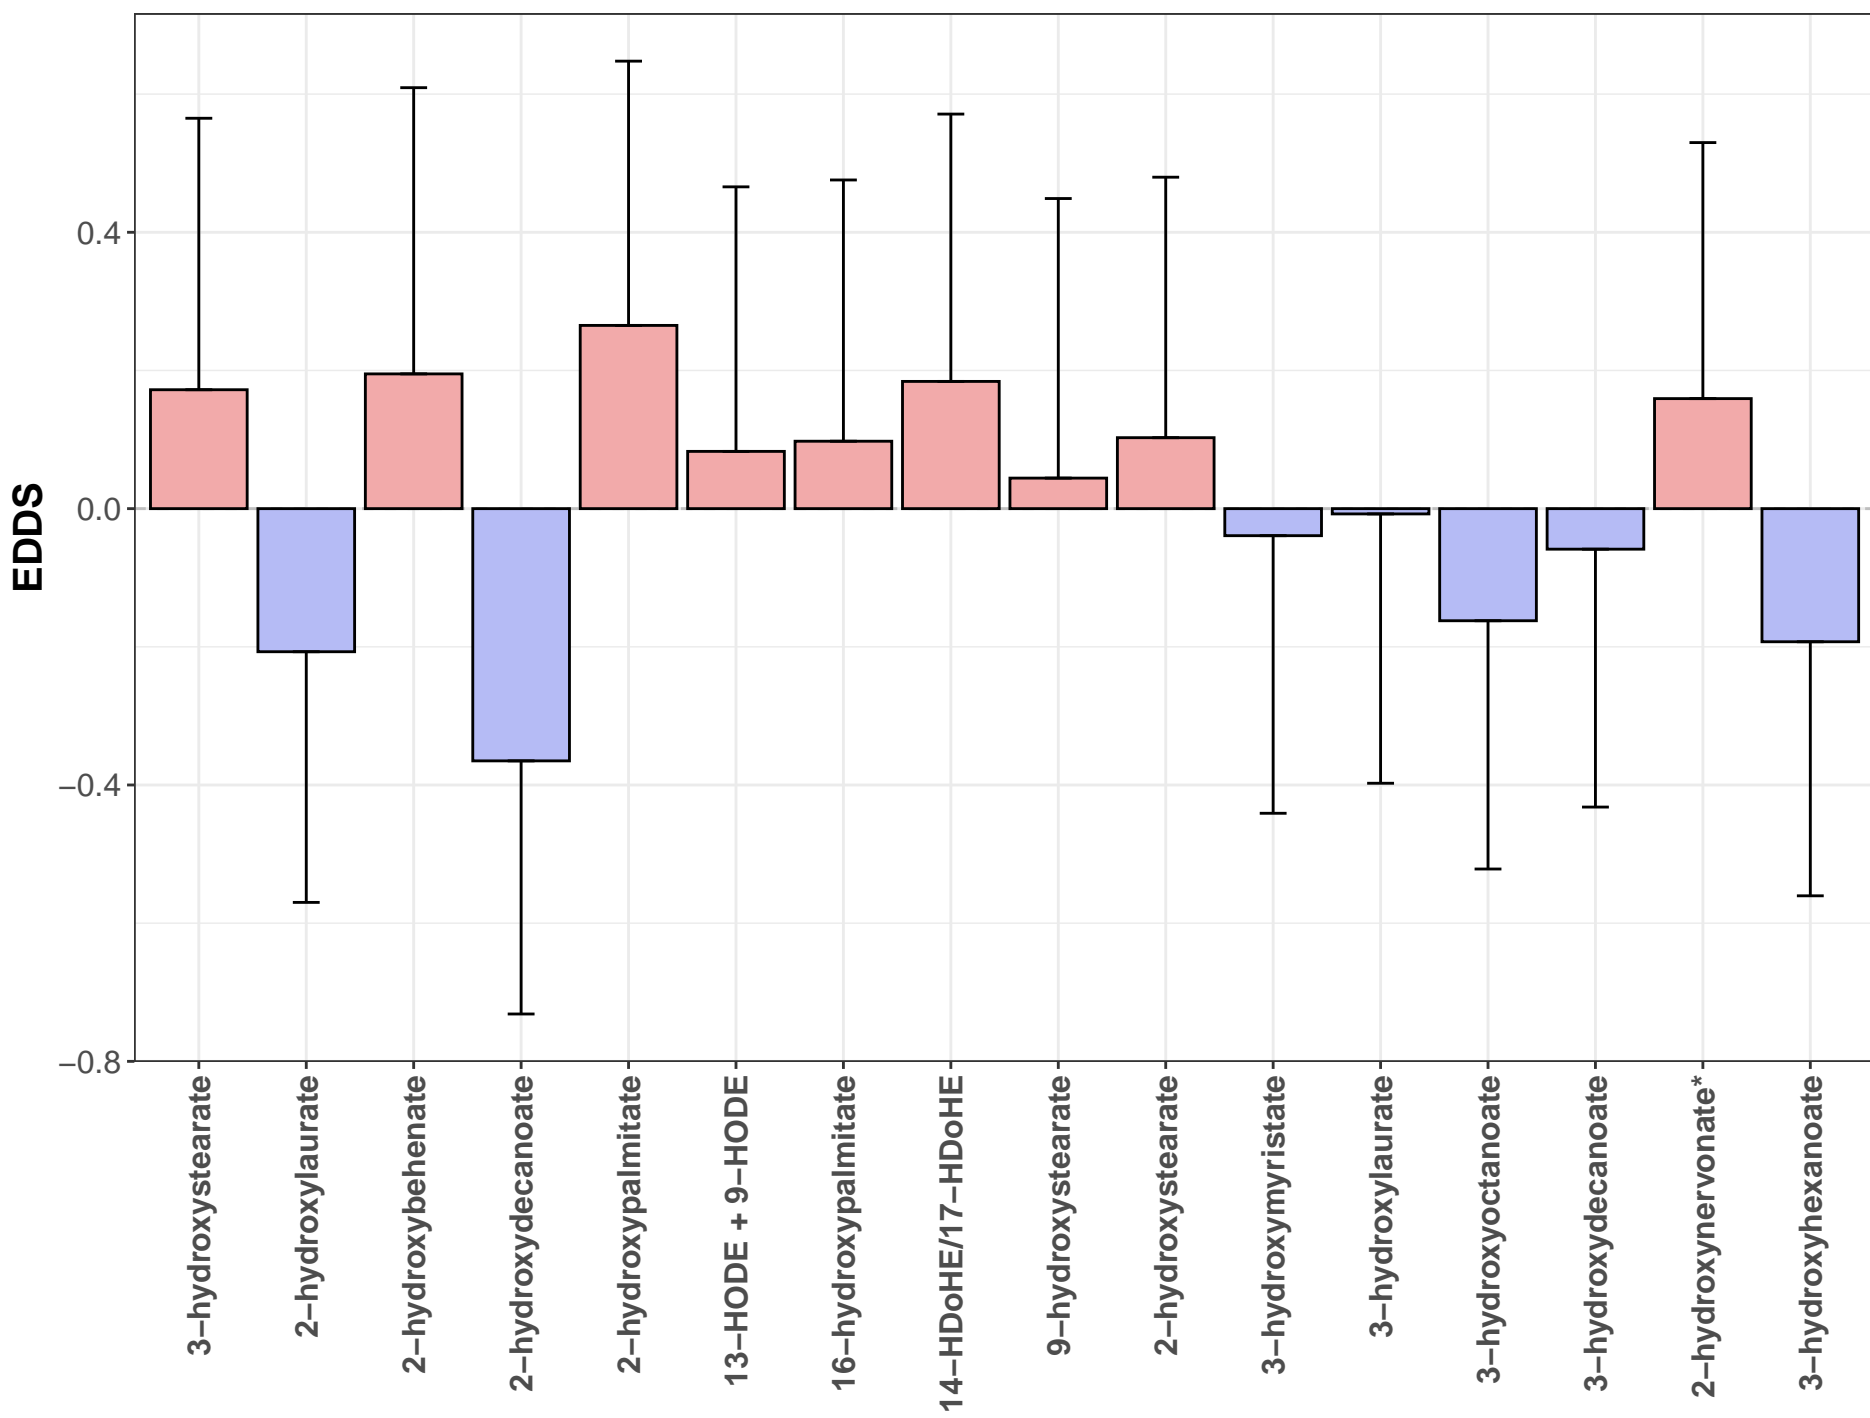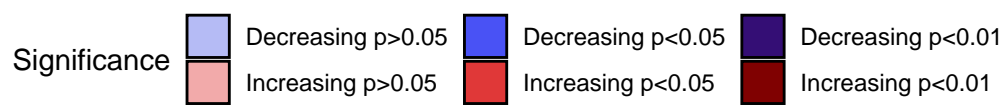



# Long Chain Fatty Acid

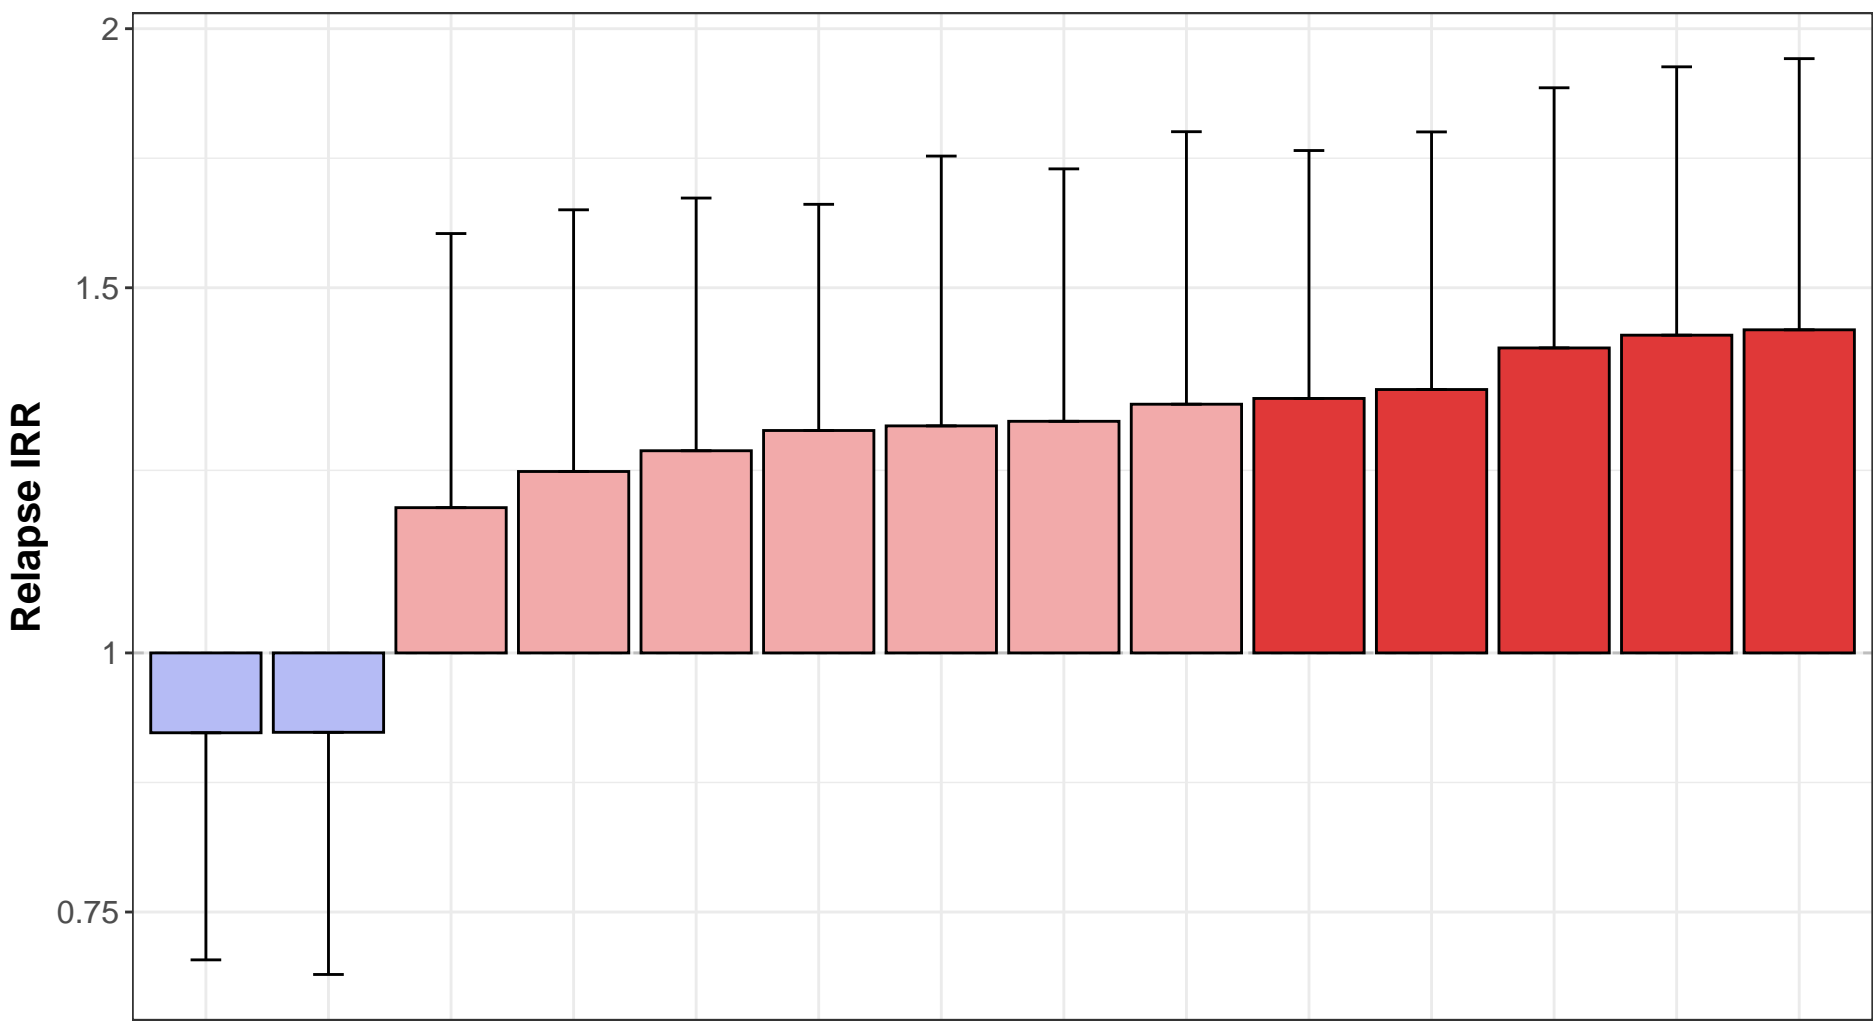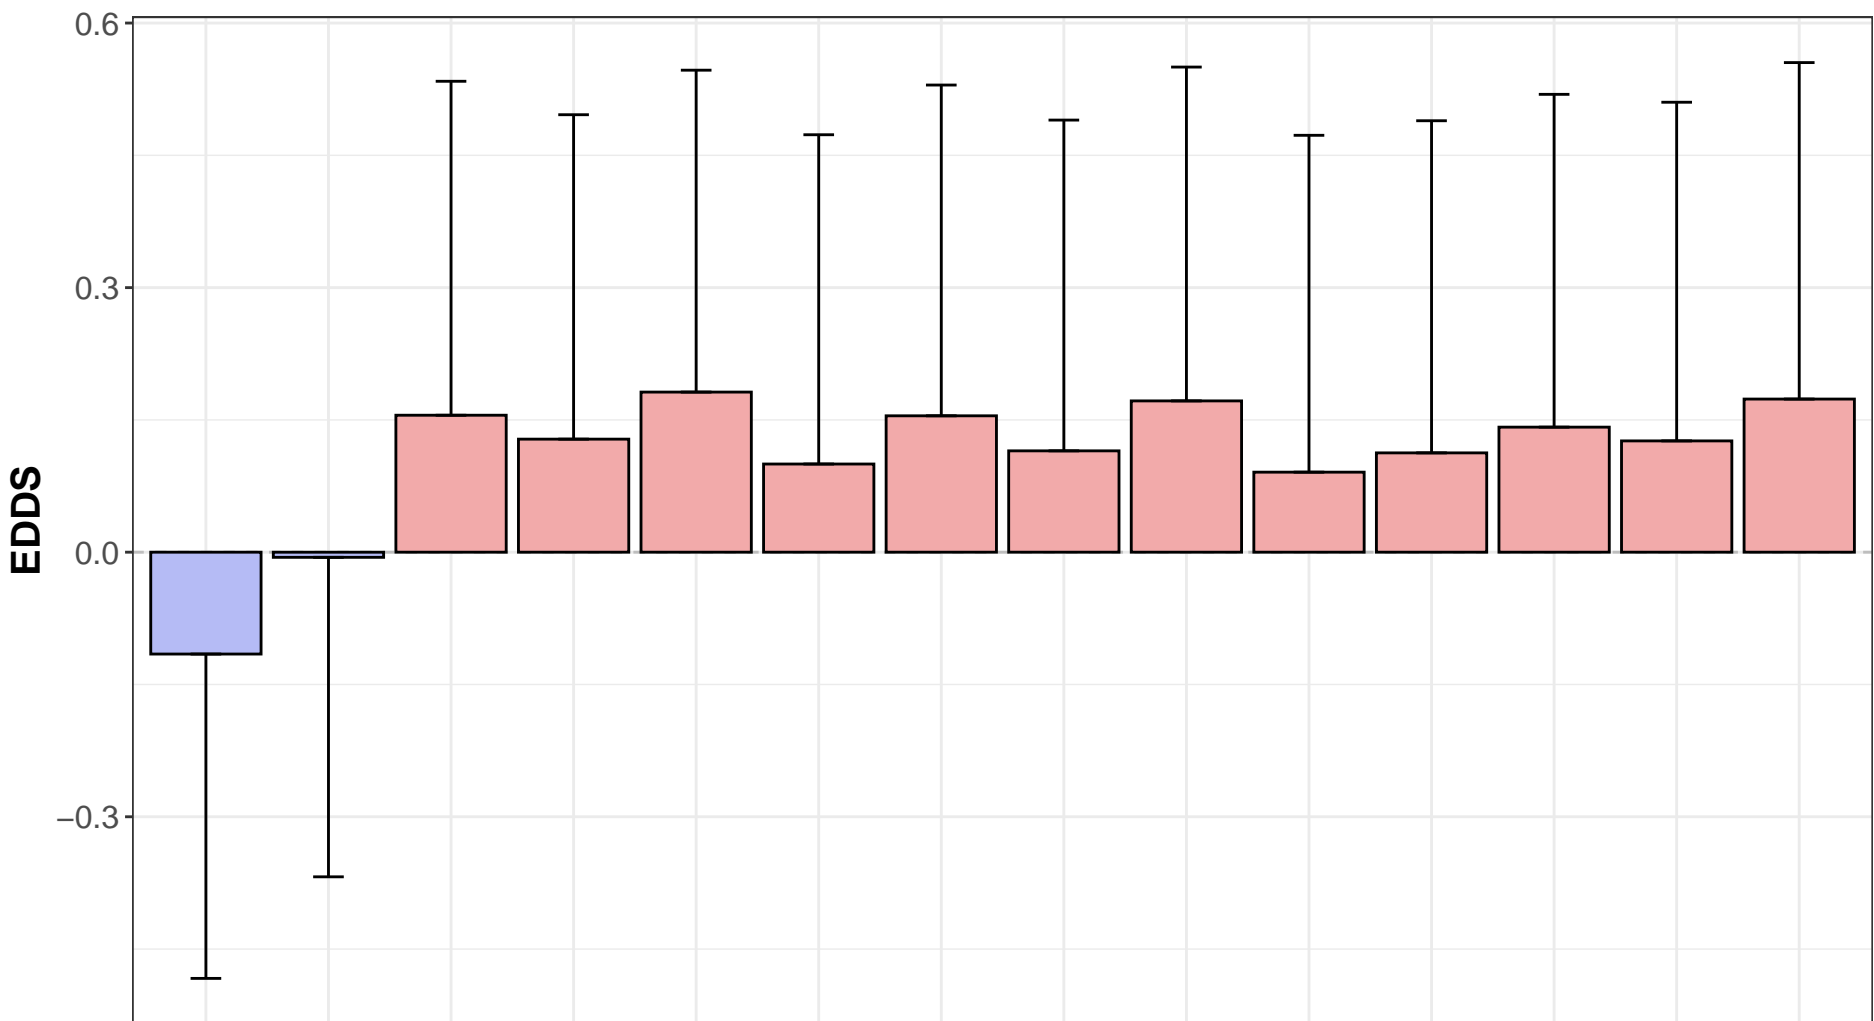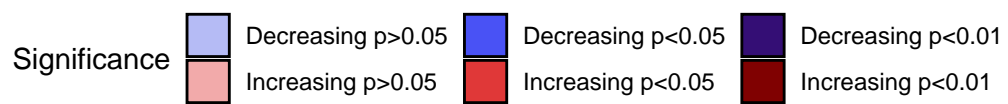

# Lysophospholipid

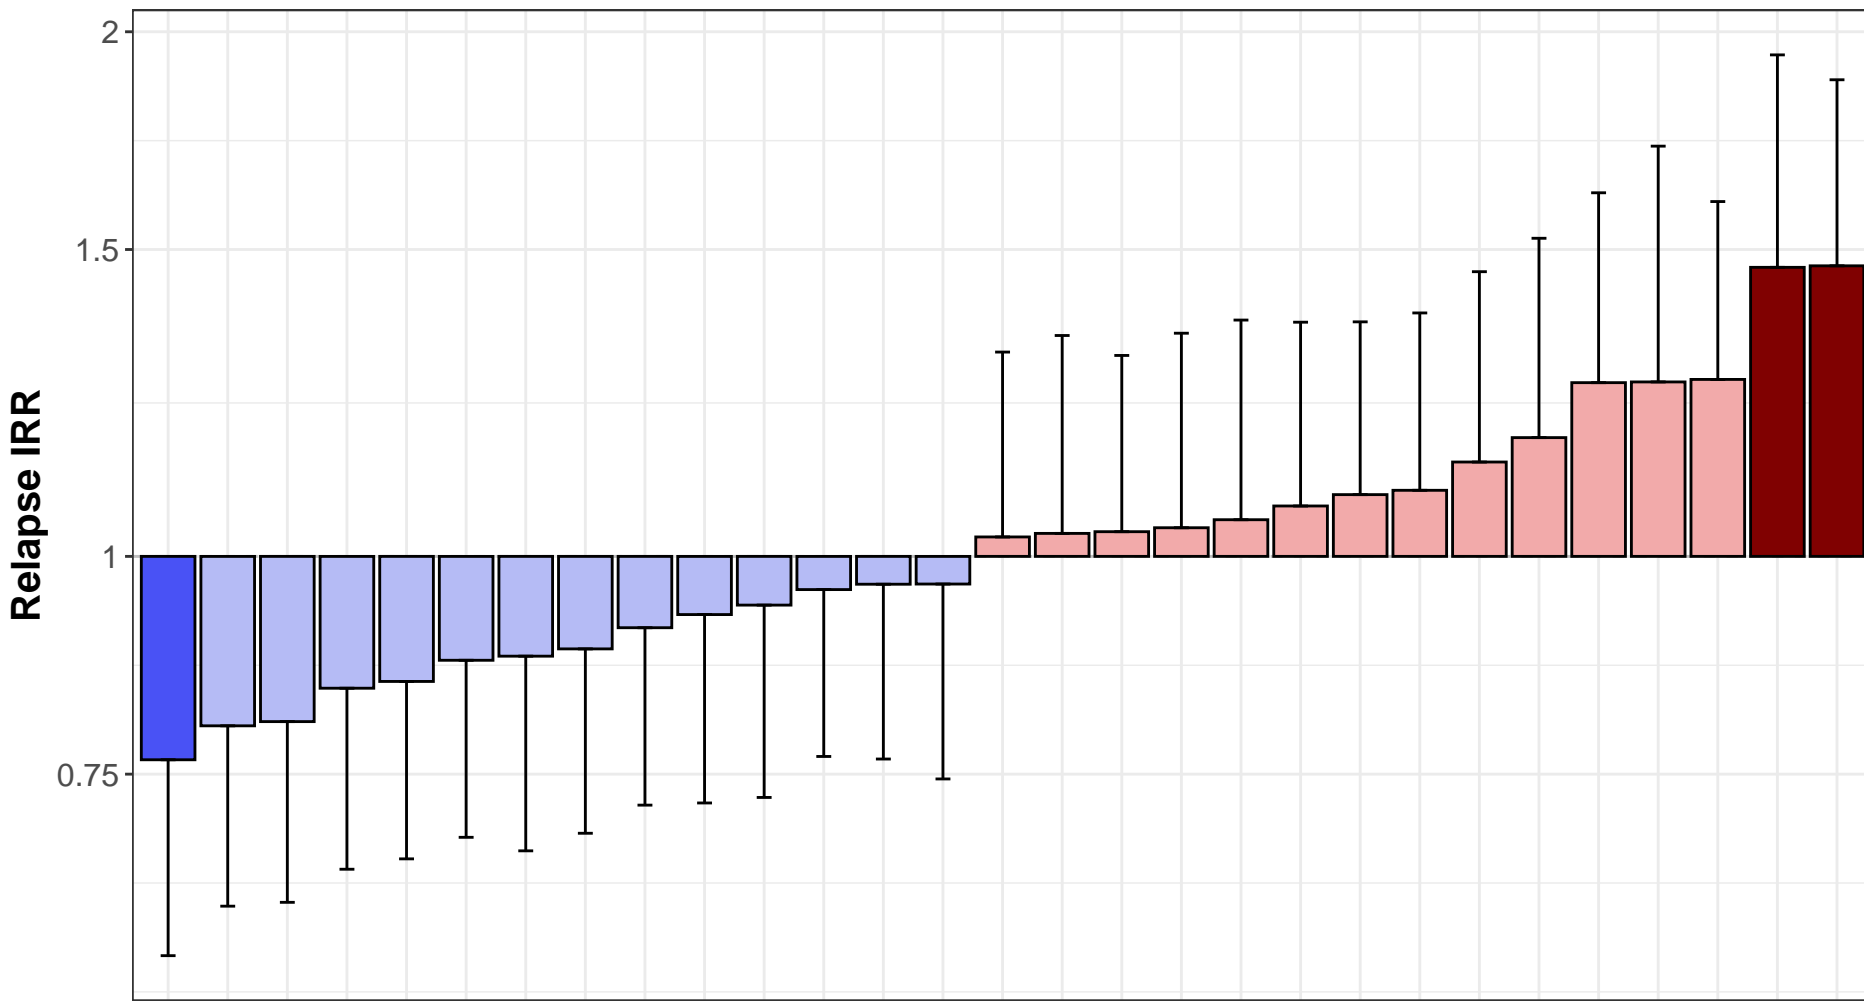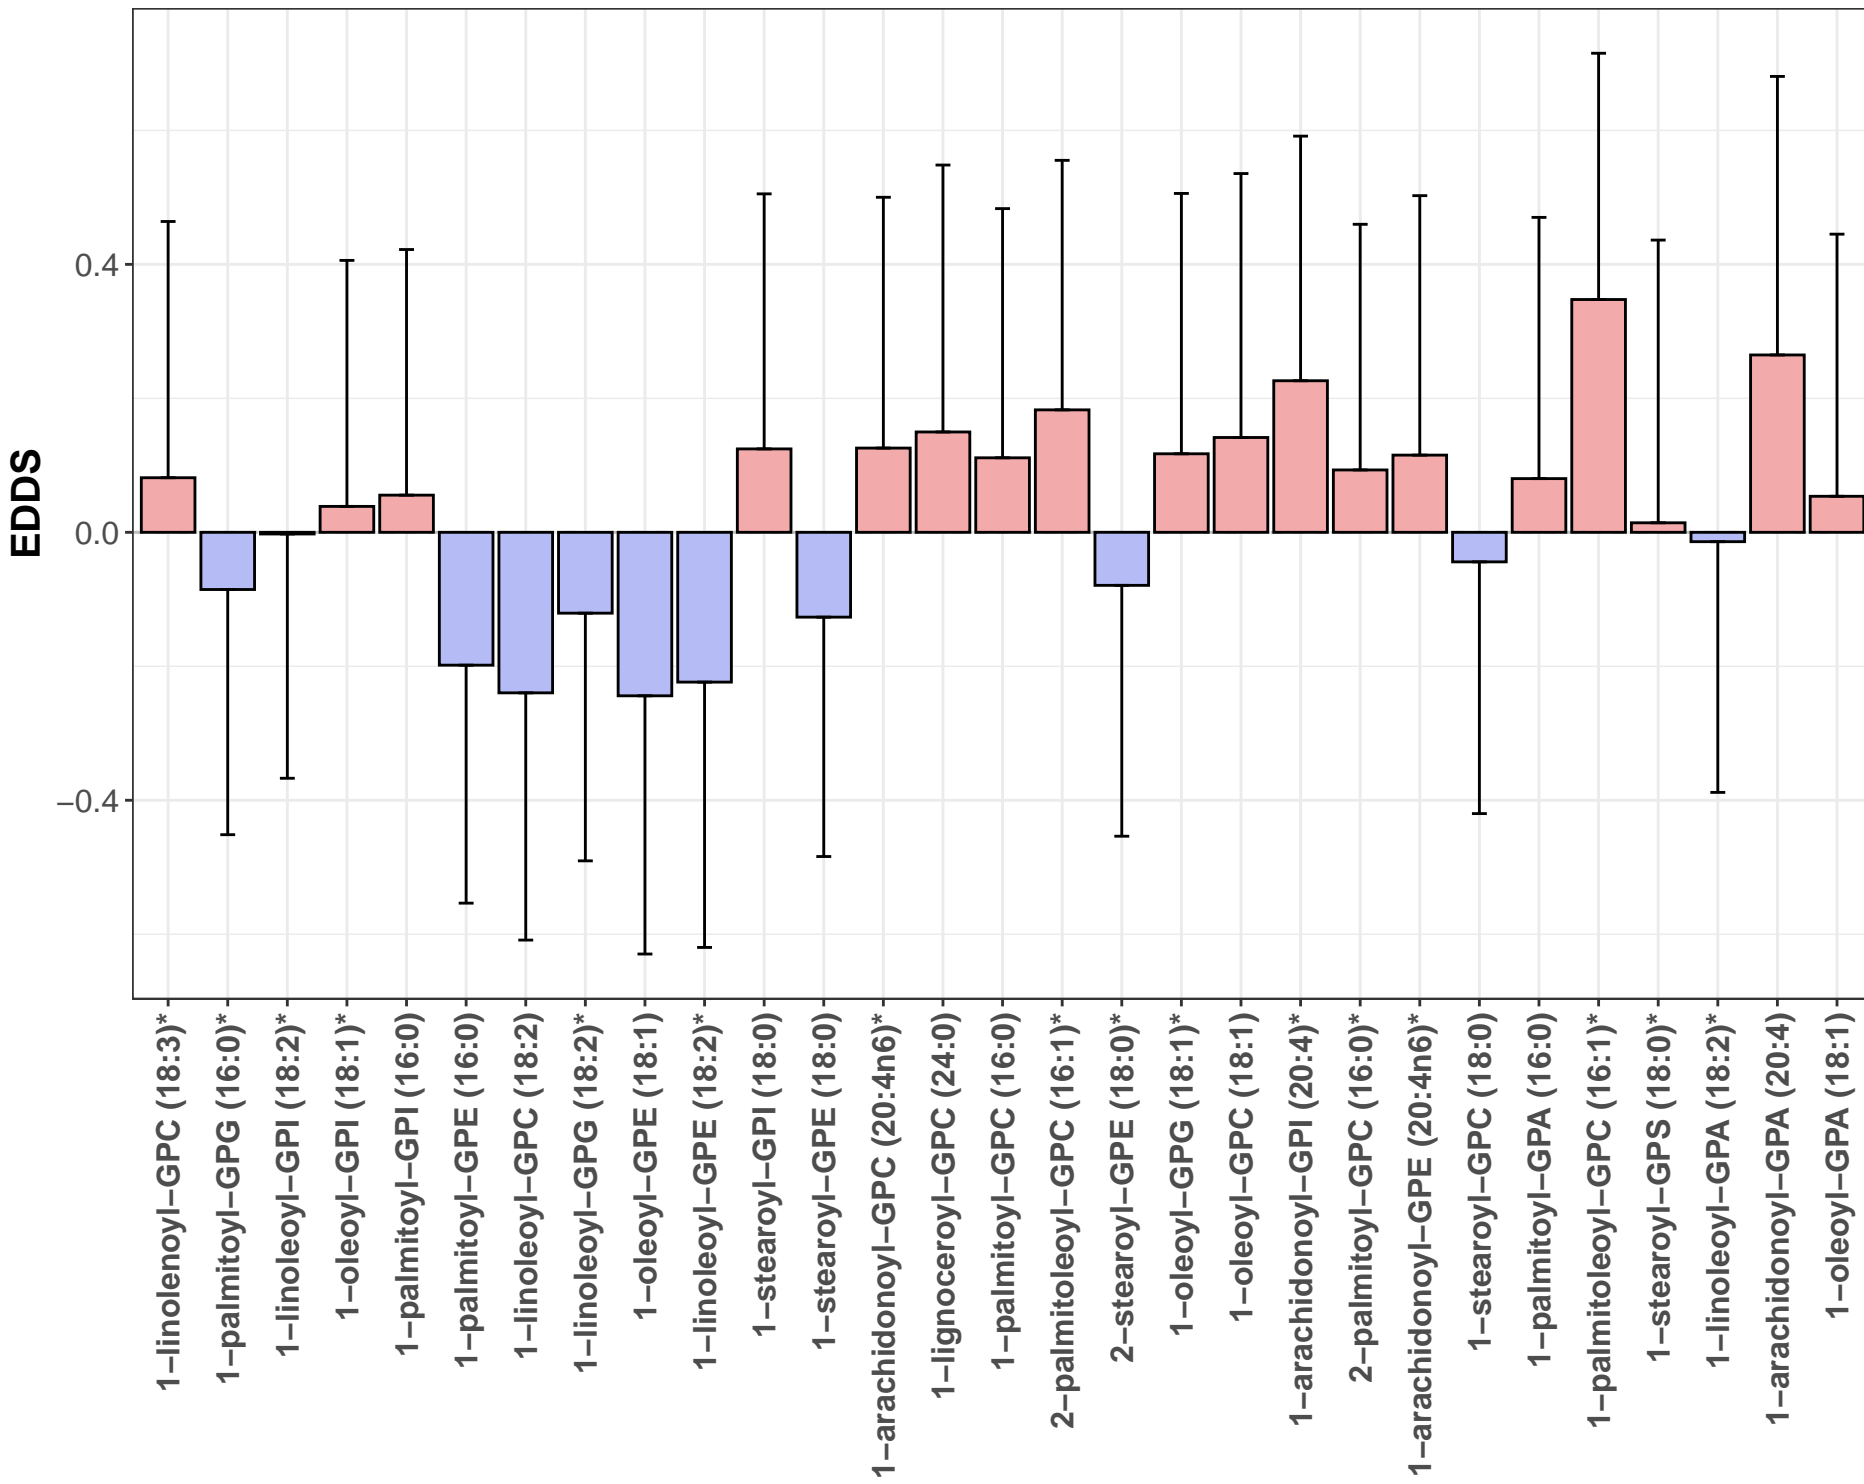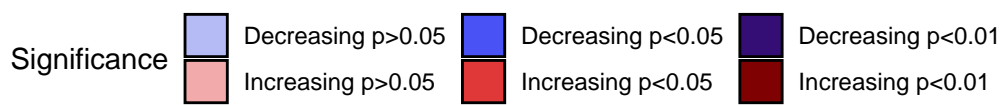

# Lysoplasmalogen

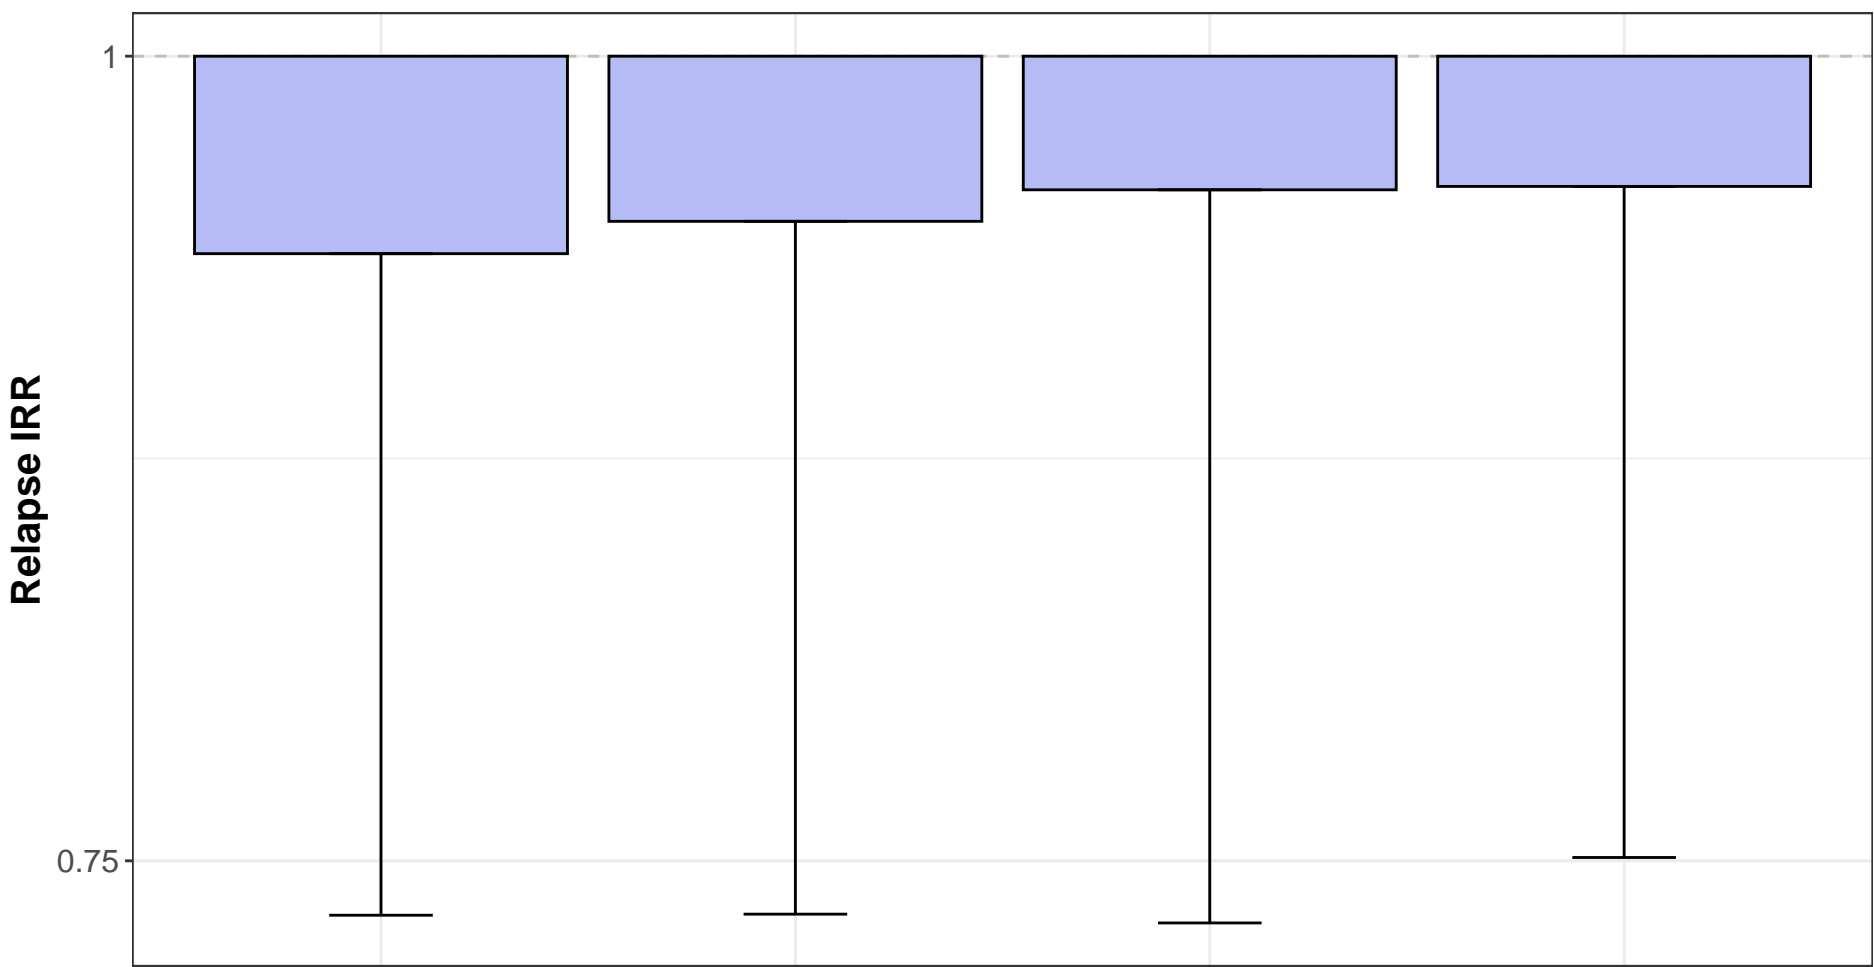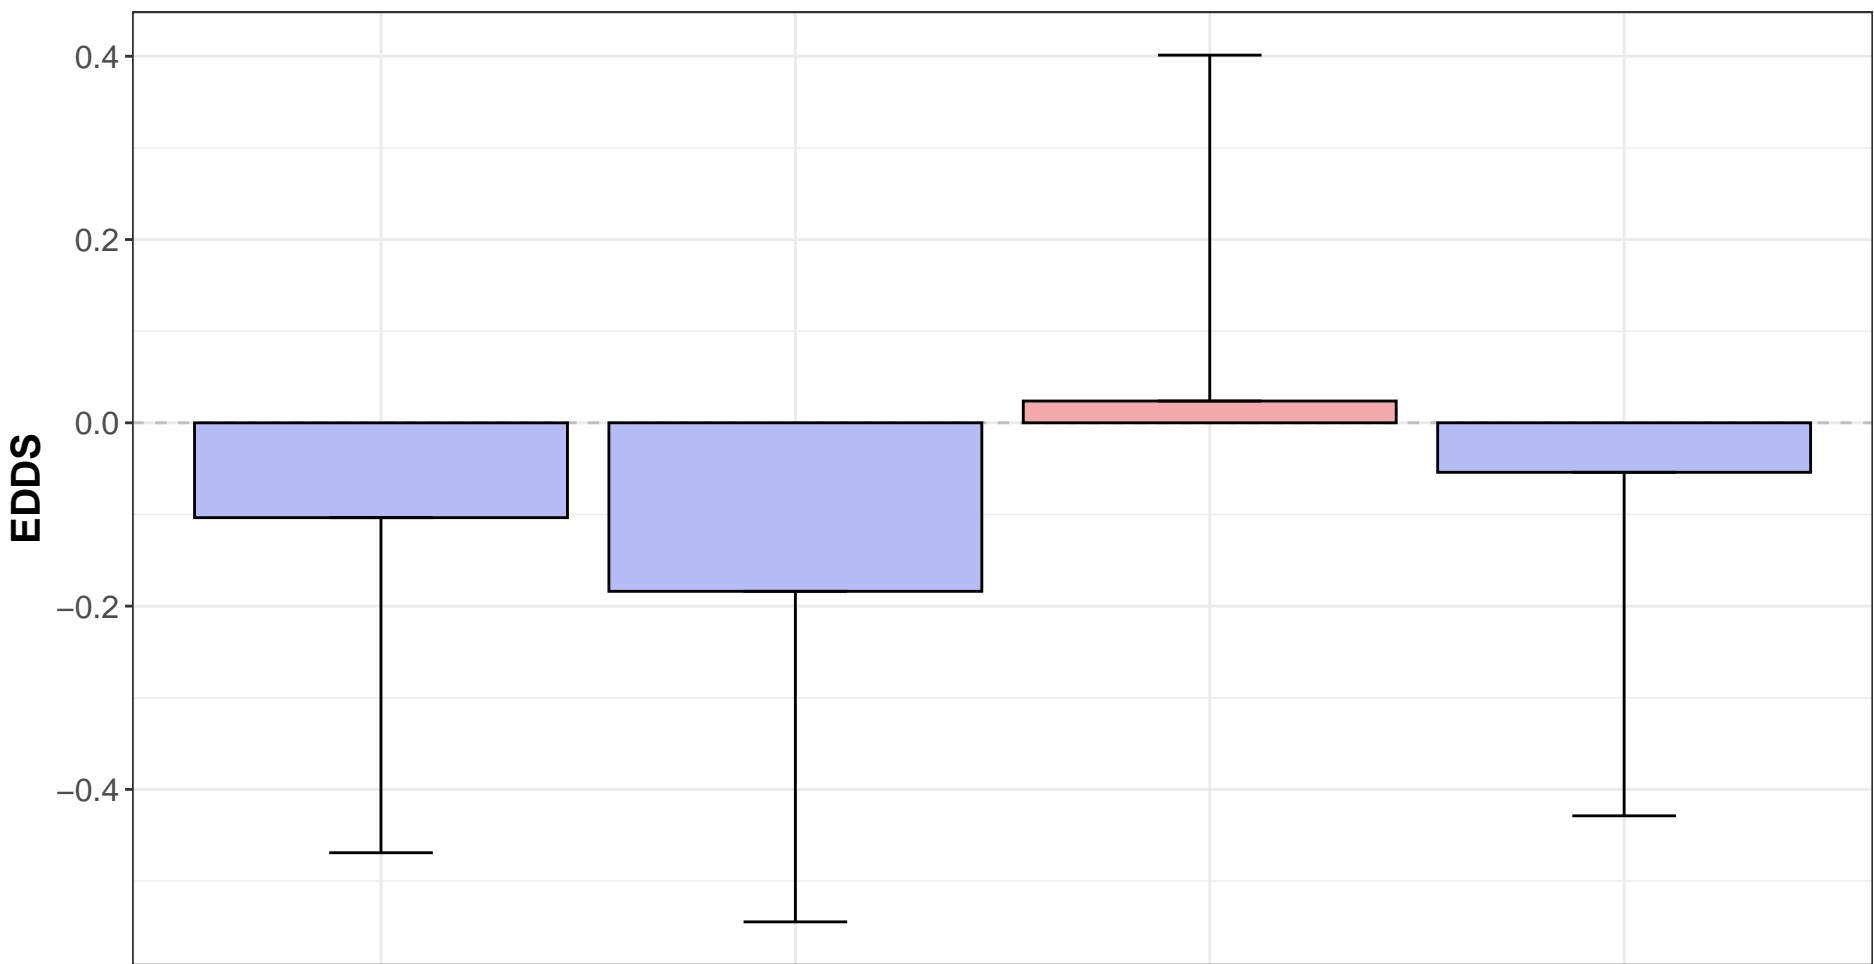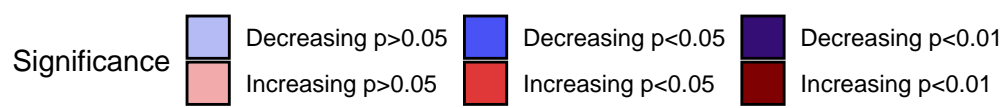

# Medium Chain Fatty Acid

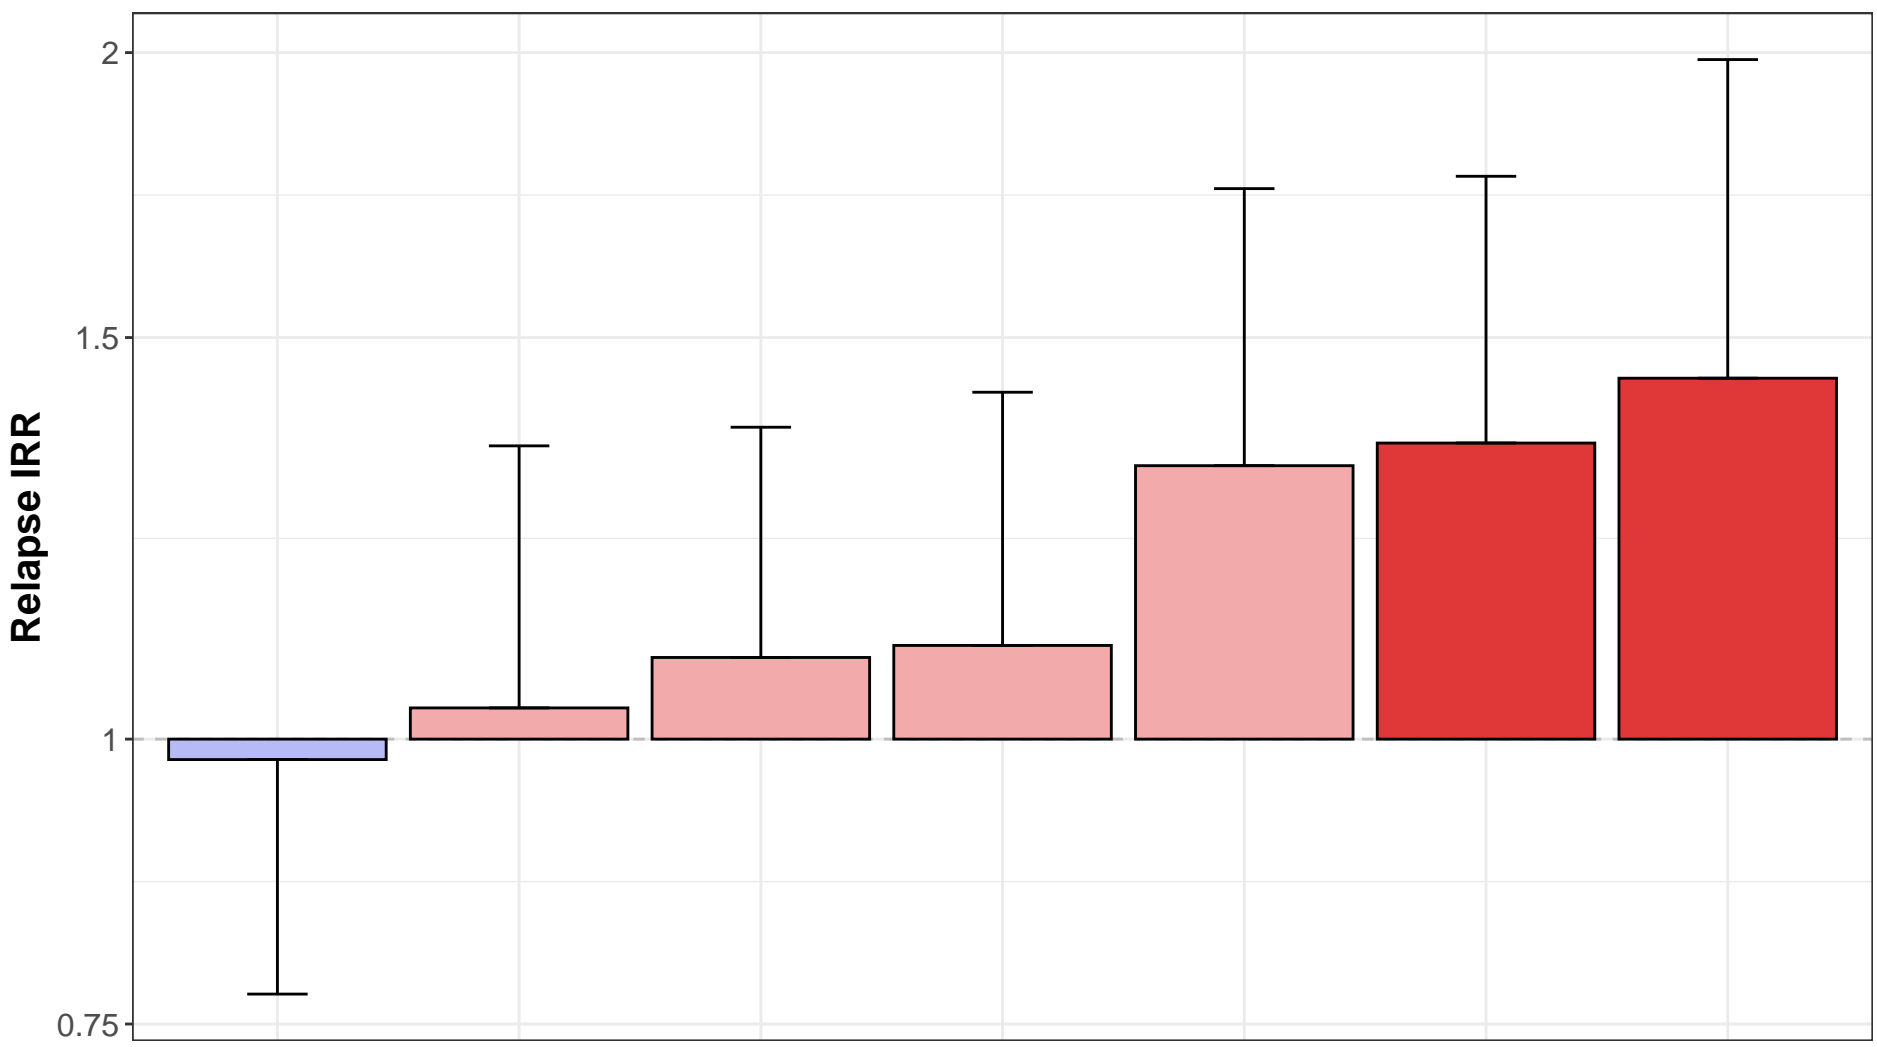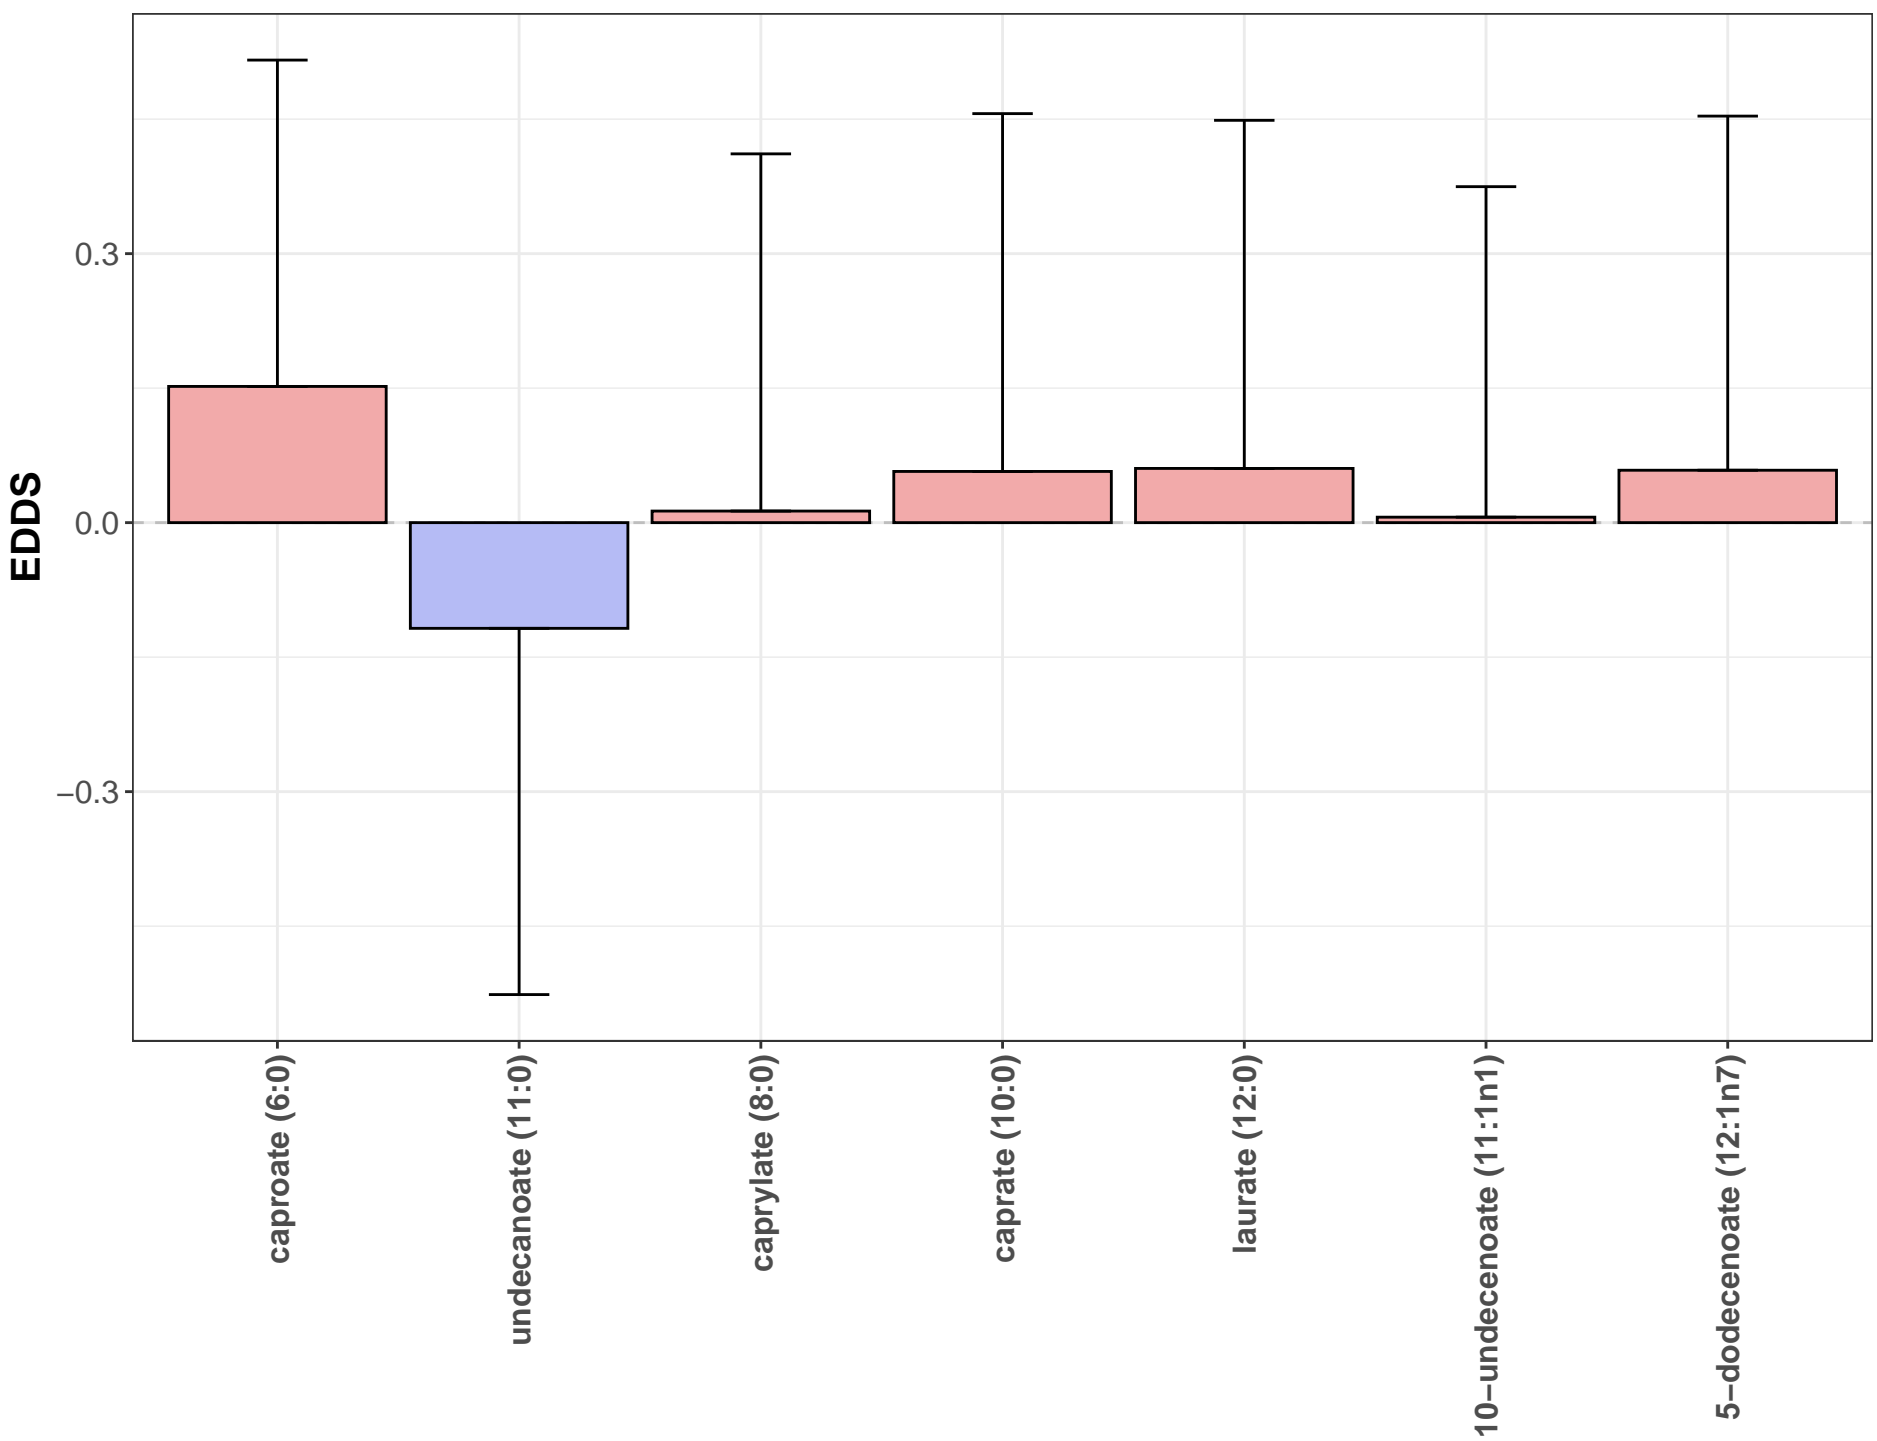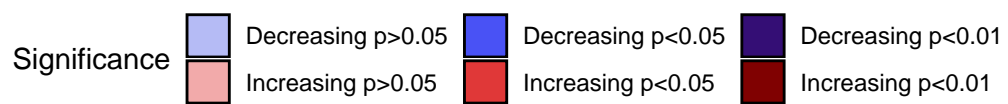

# Monoacylglycerol

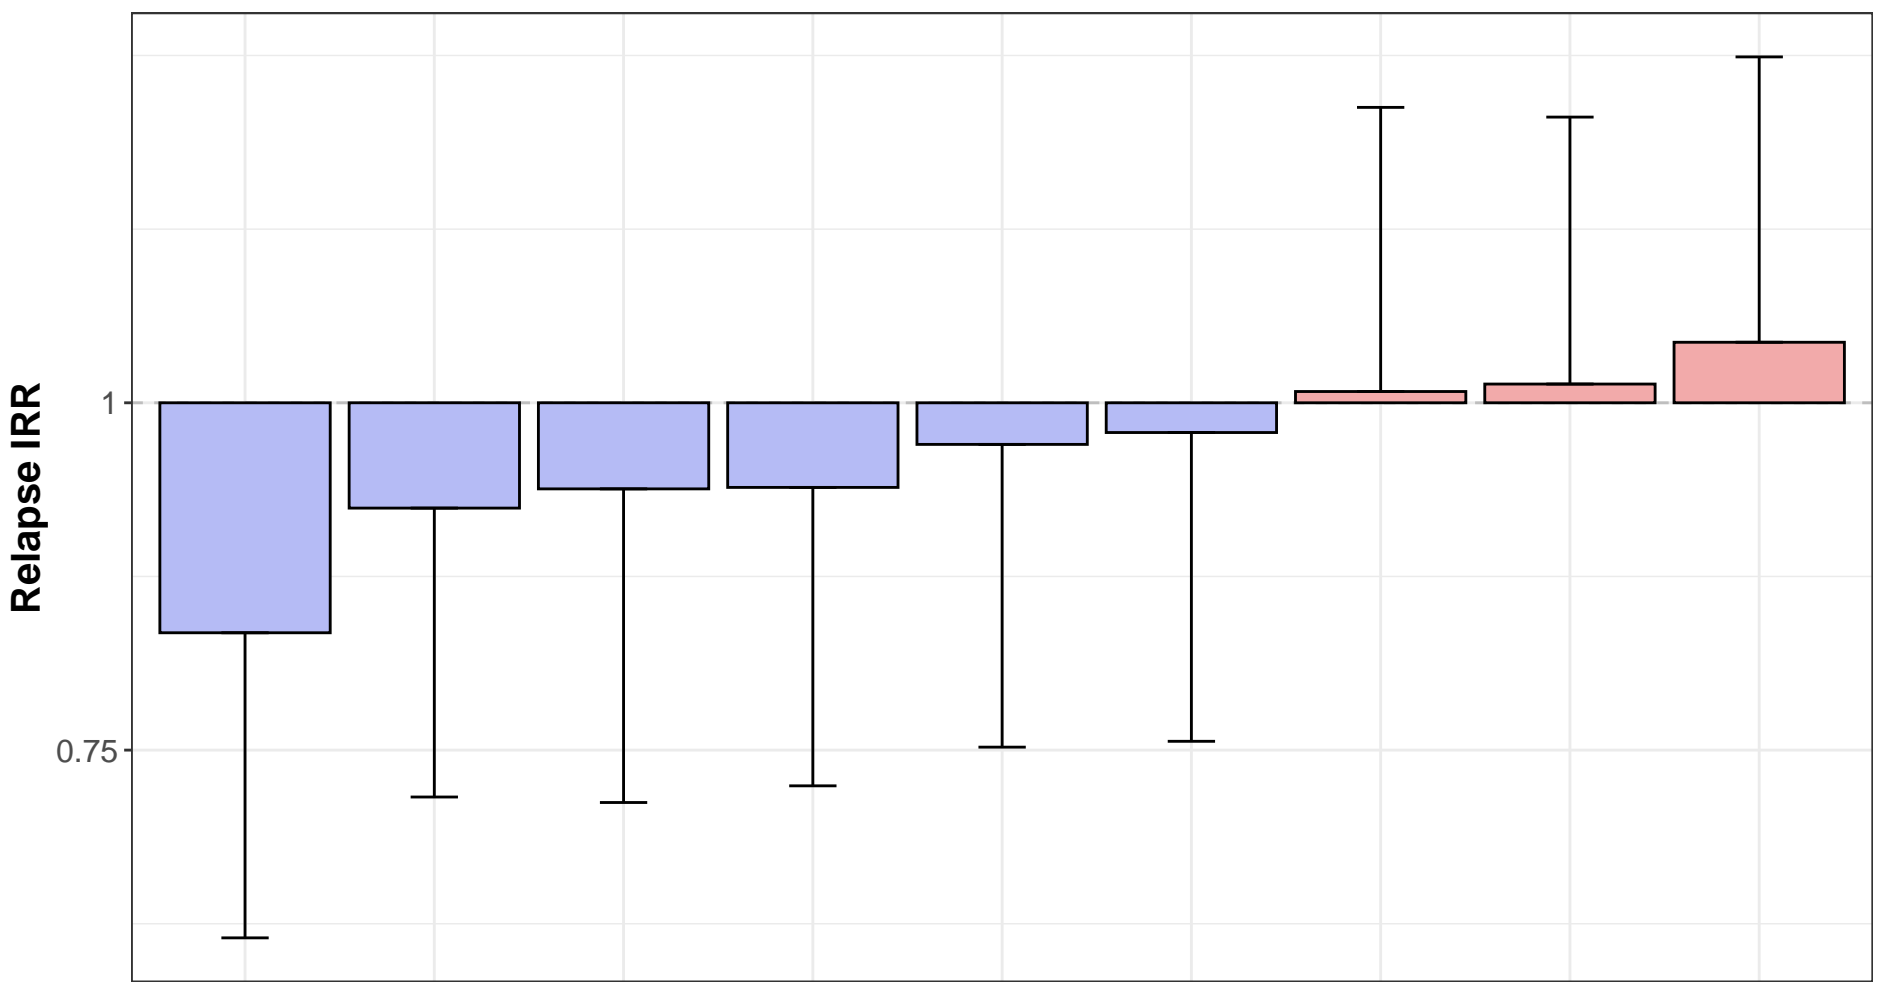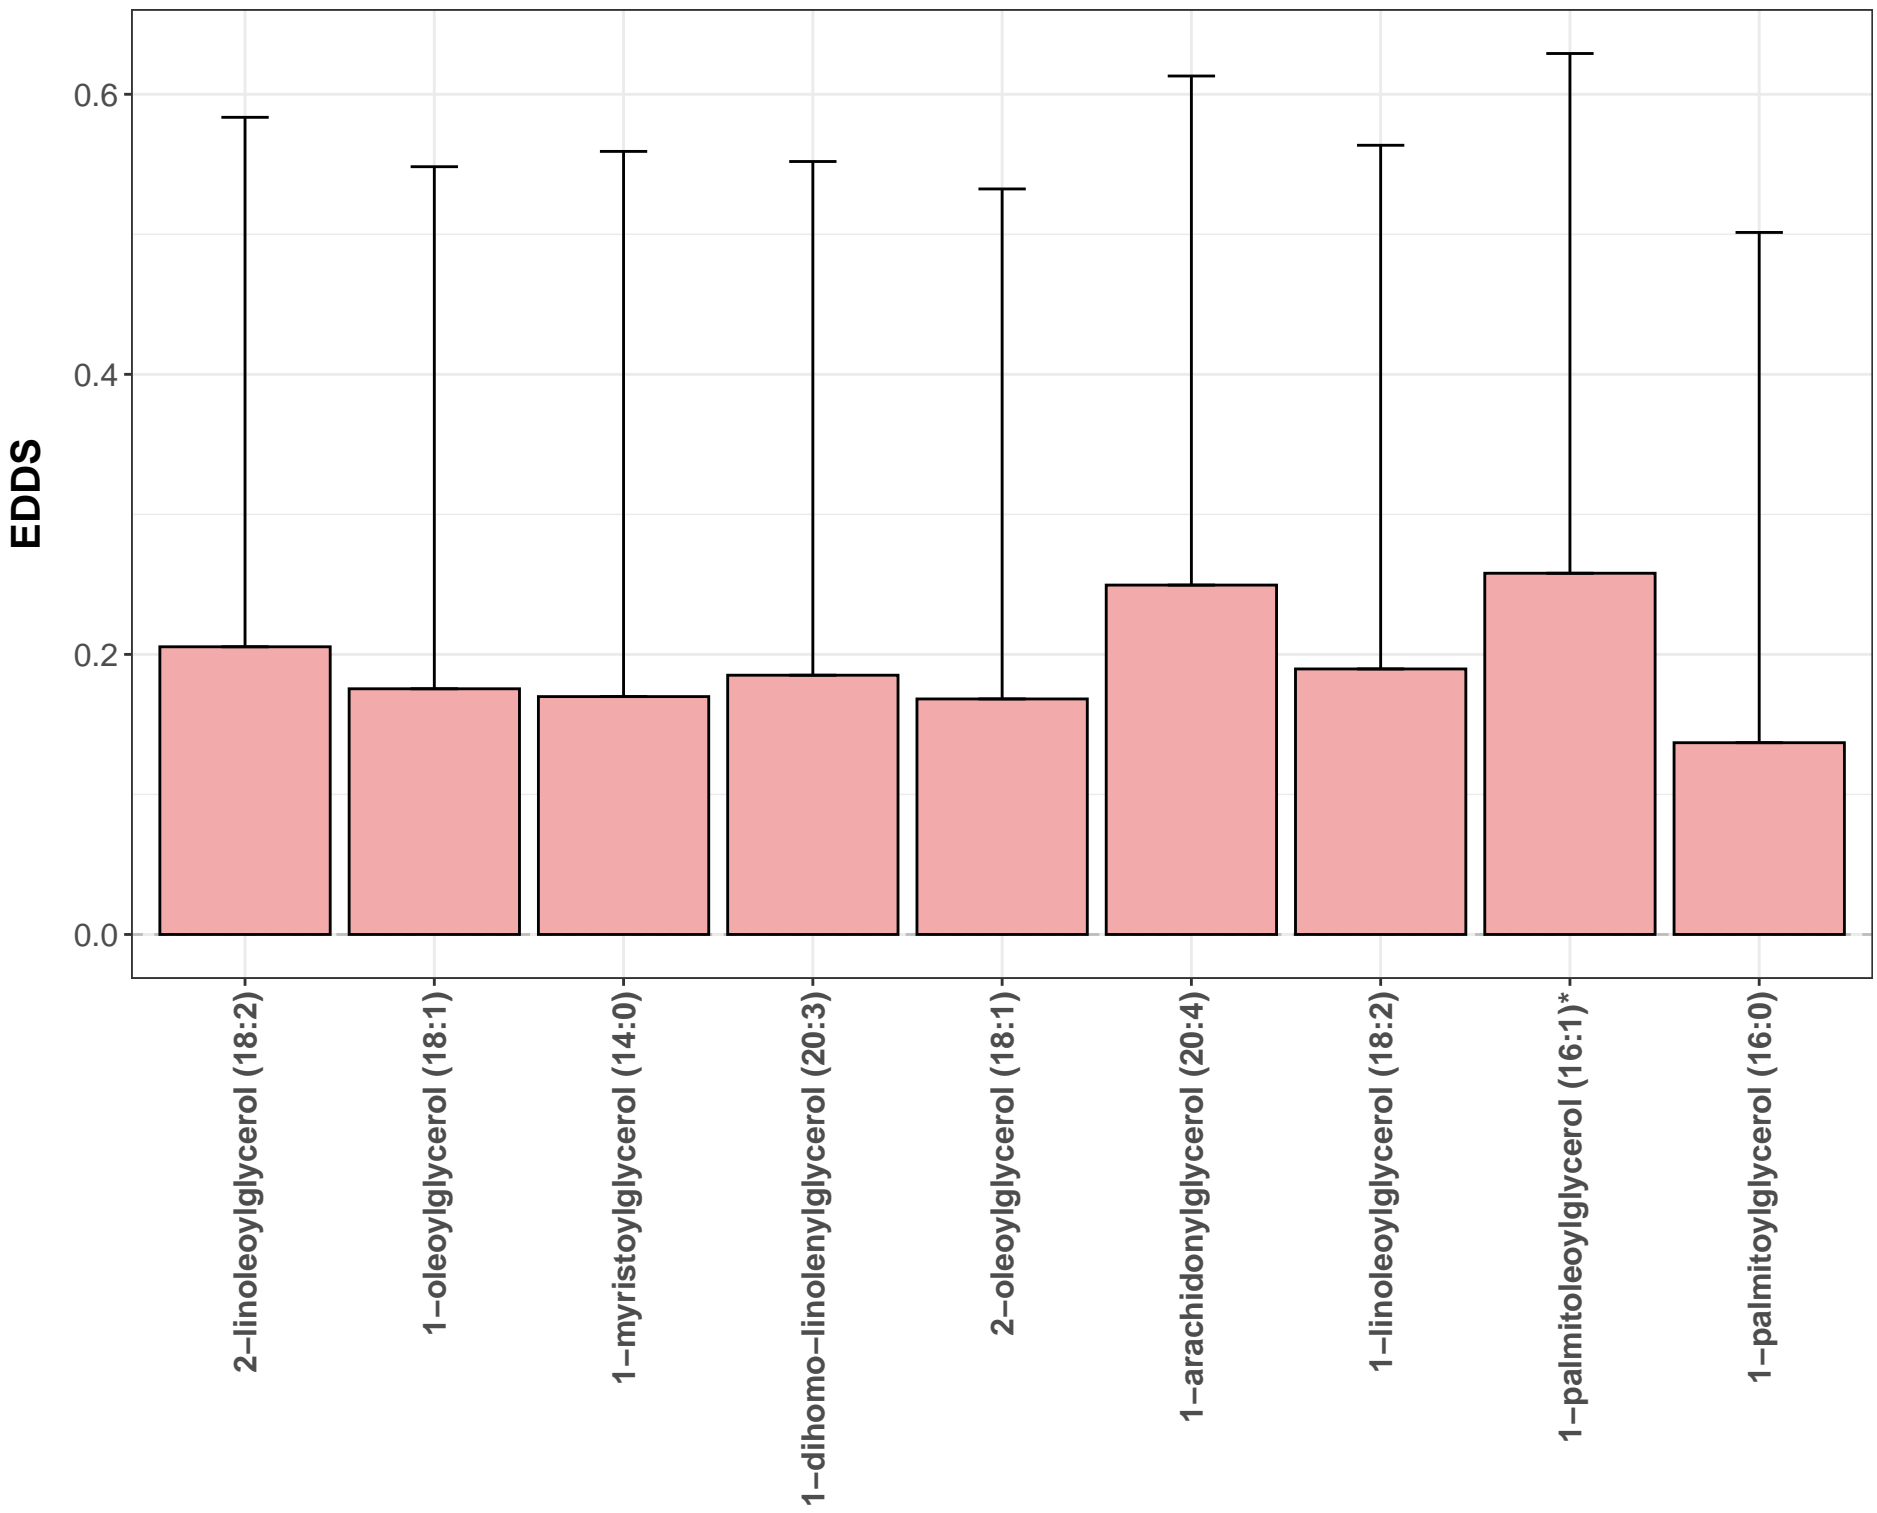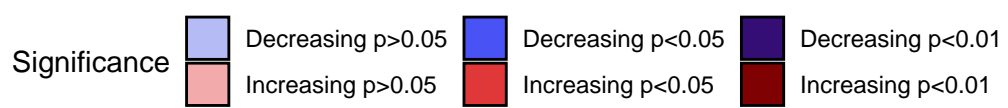

# Phosphatidylcholine (PC)

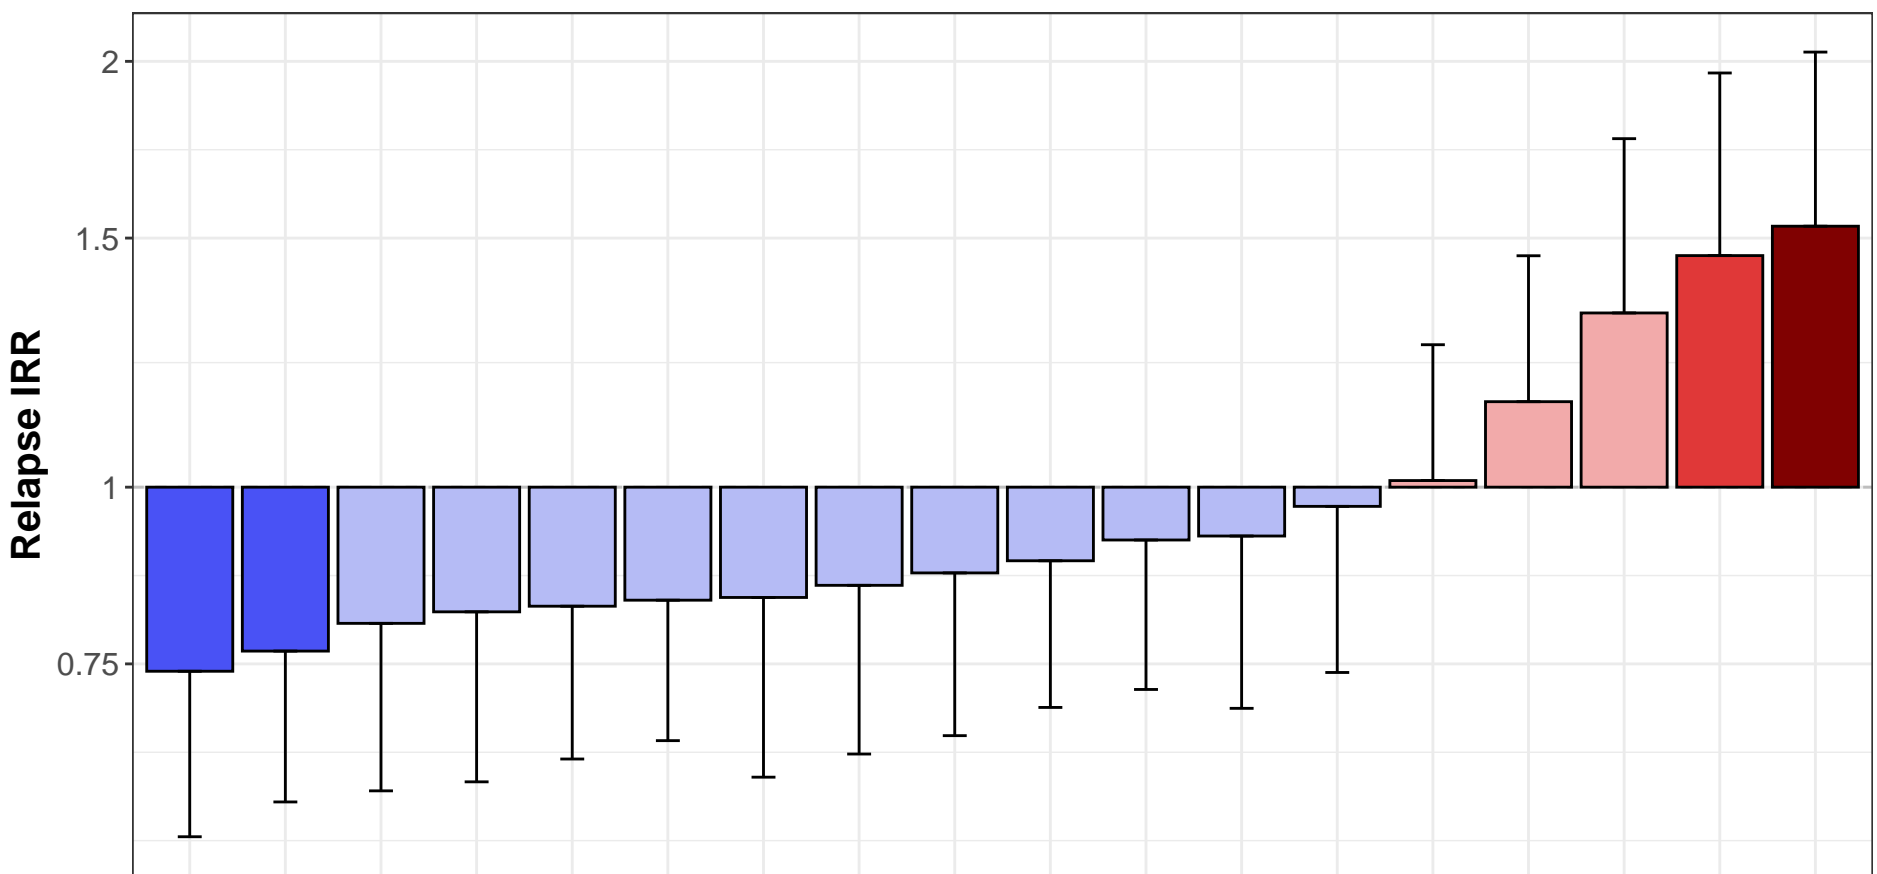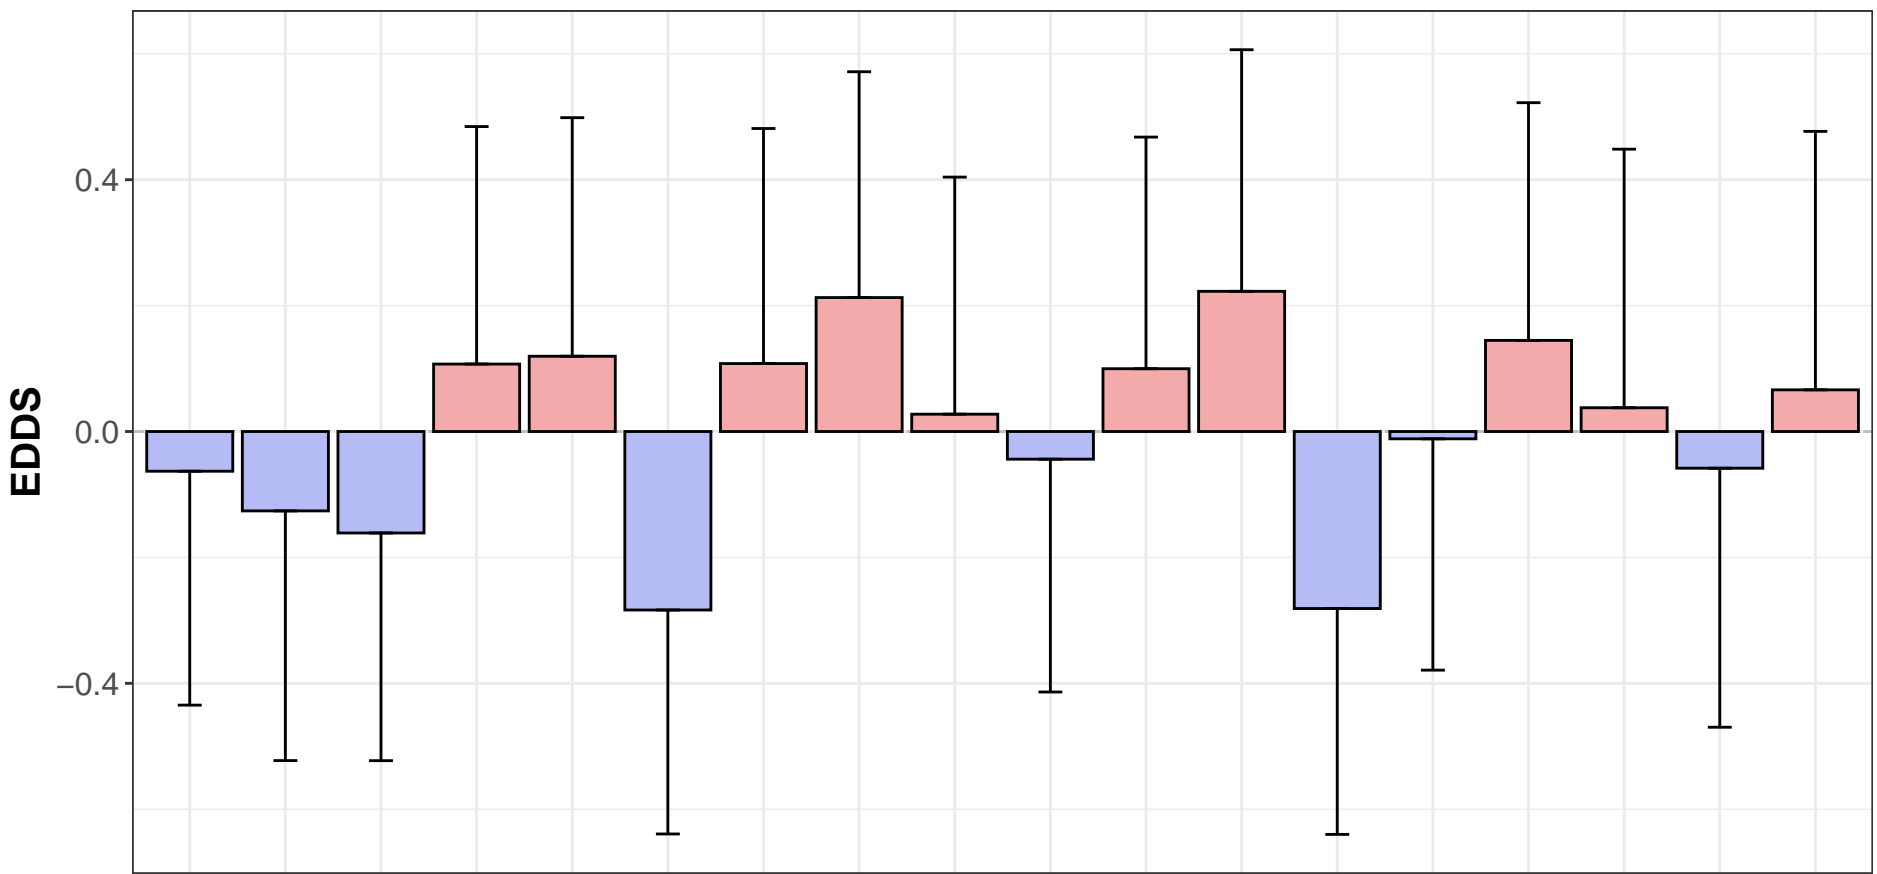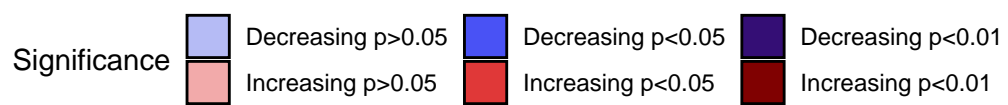

# Phosphatidylethanolamine (PE)

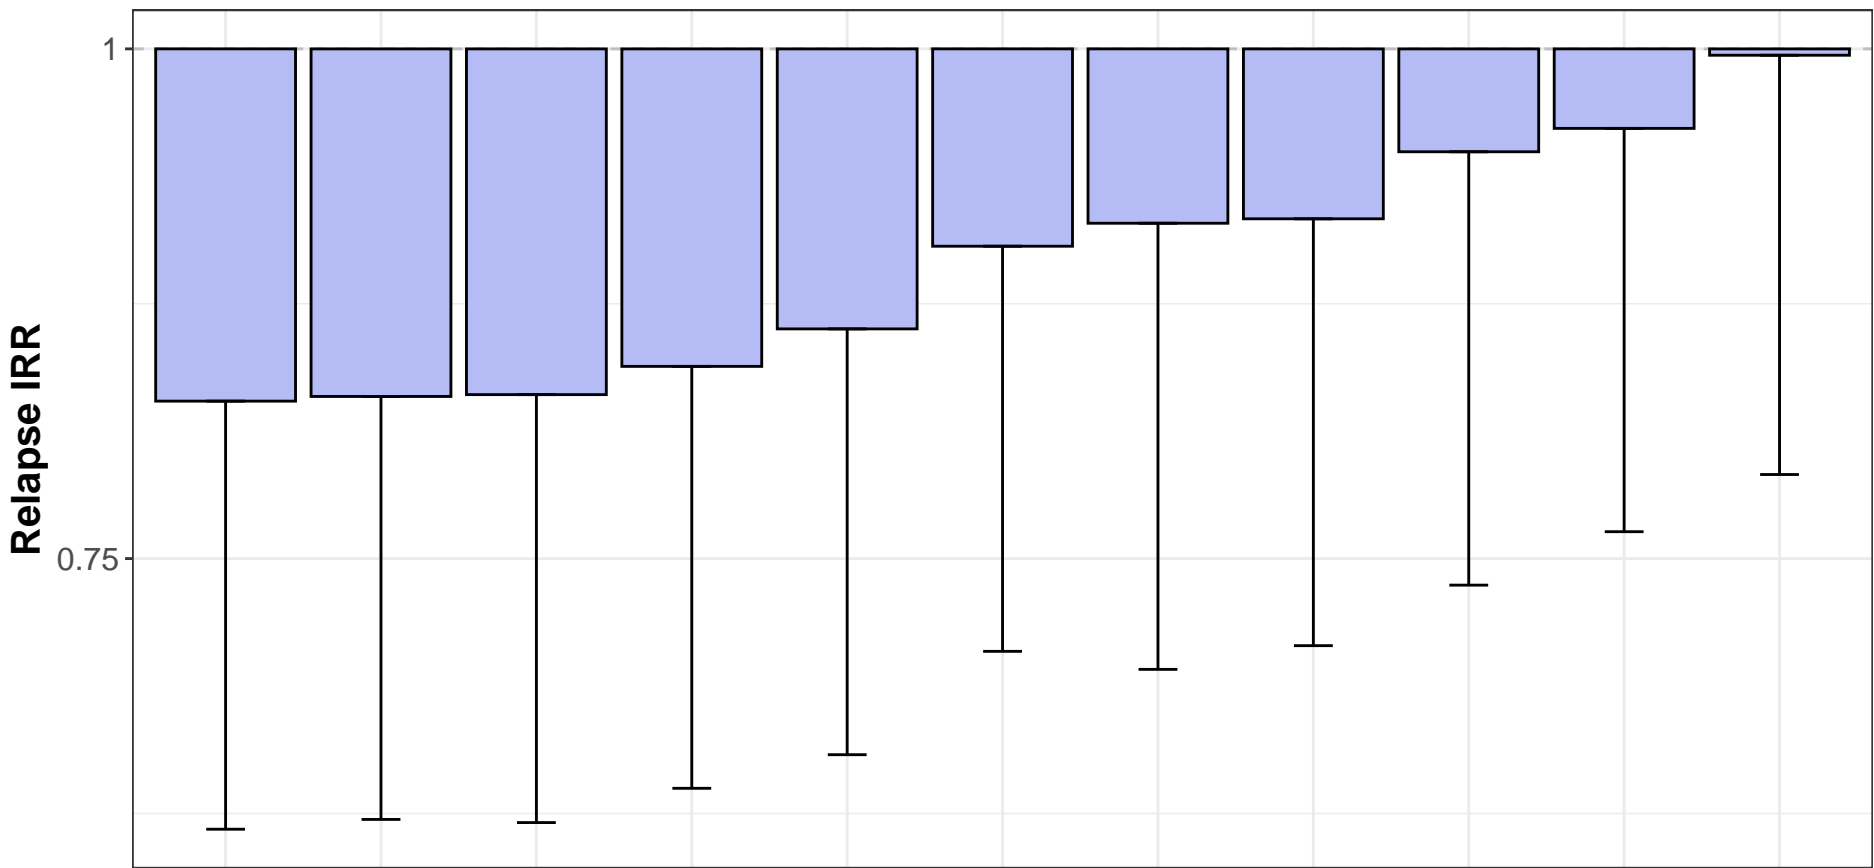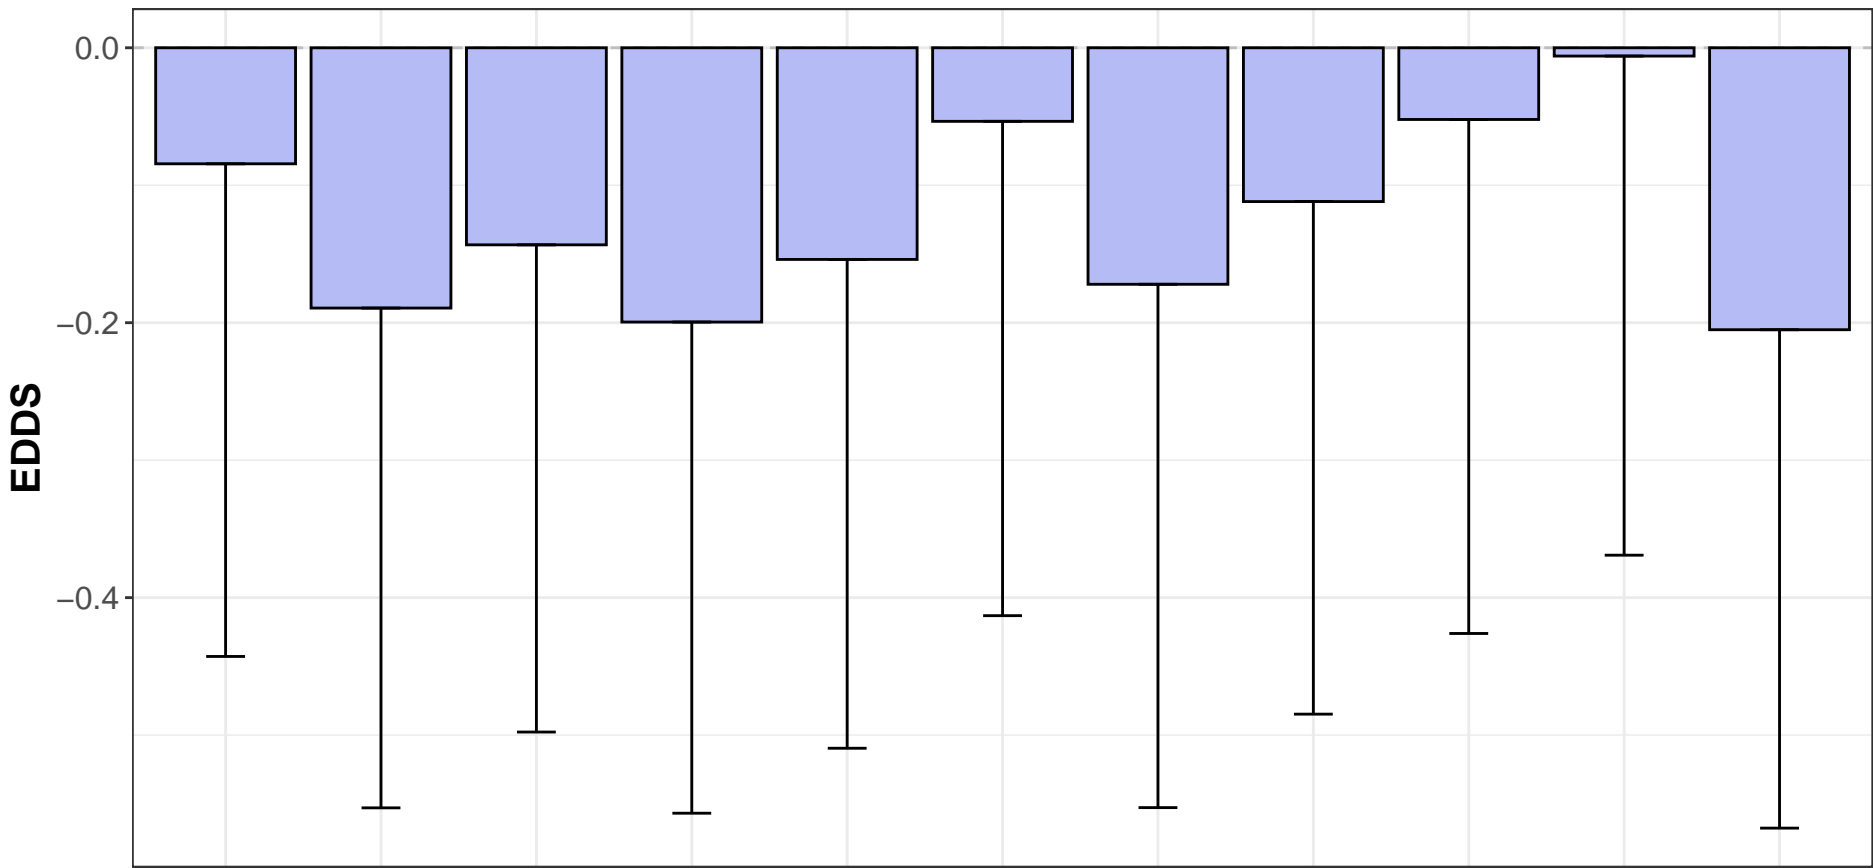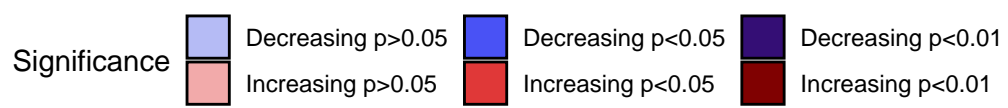

# Phosphatidylinositol (PI)

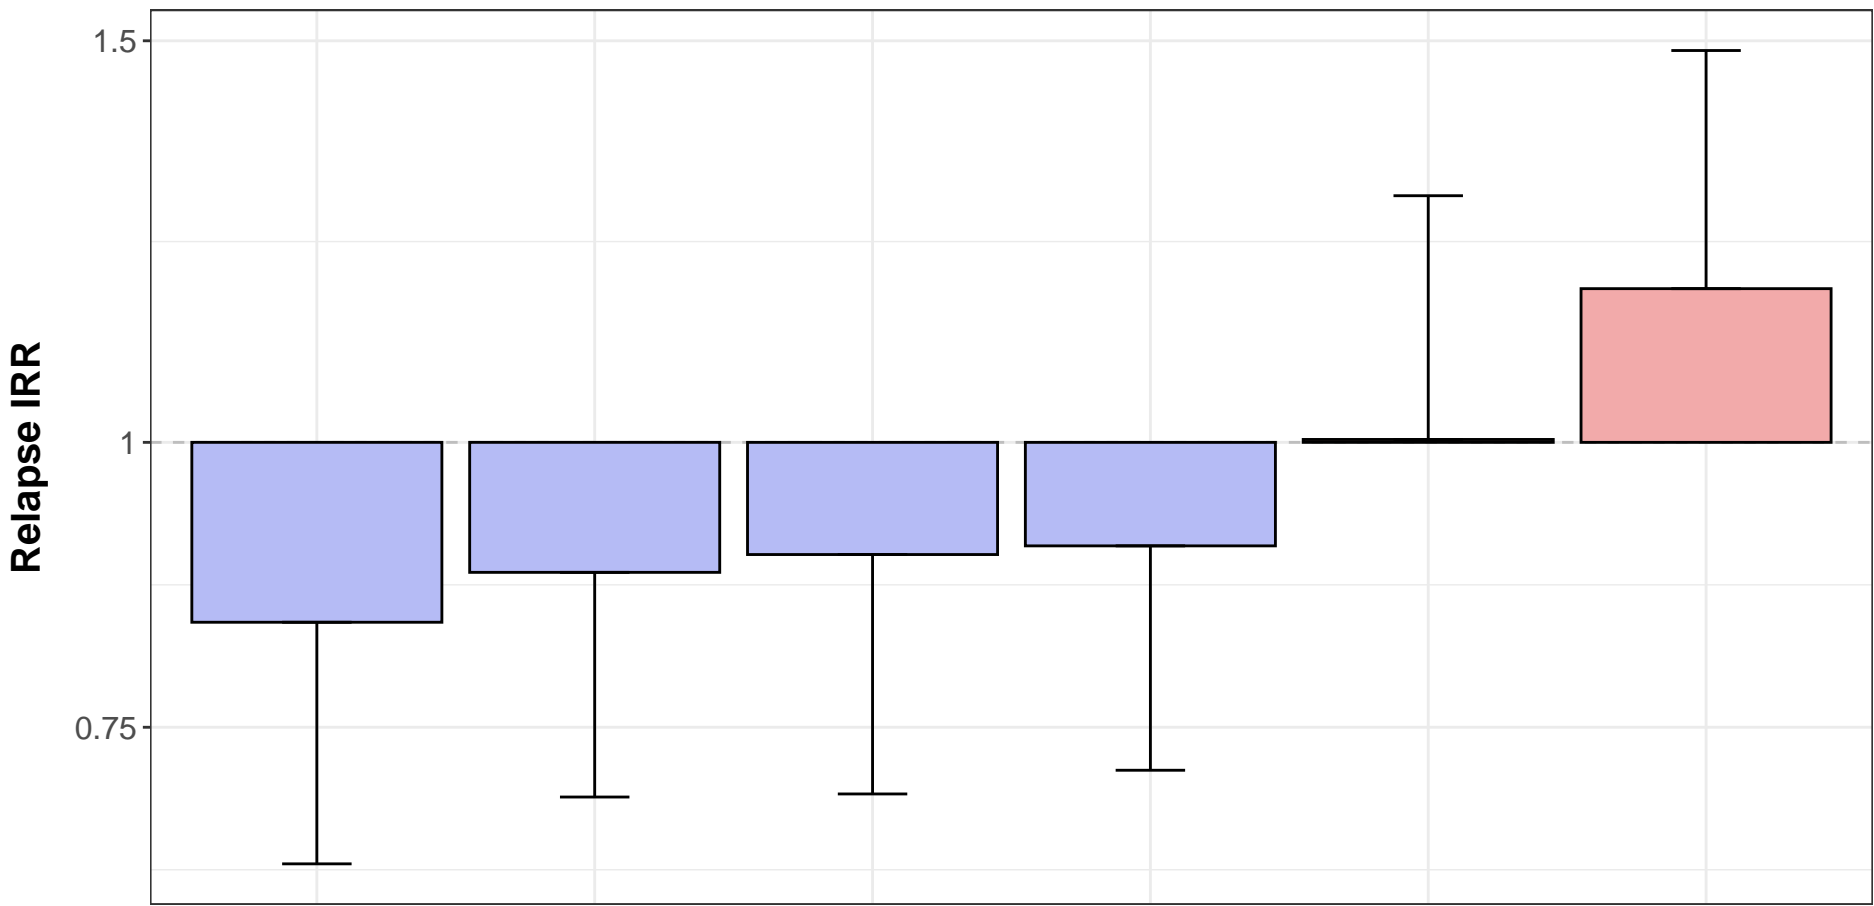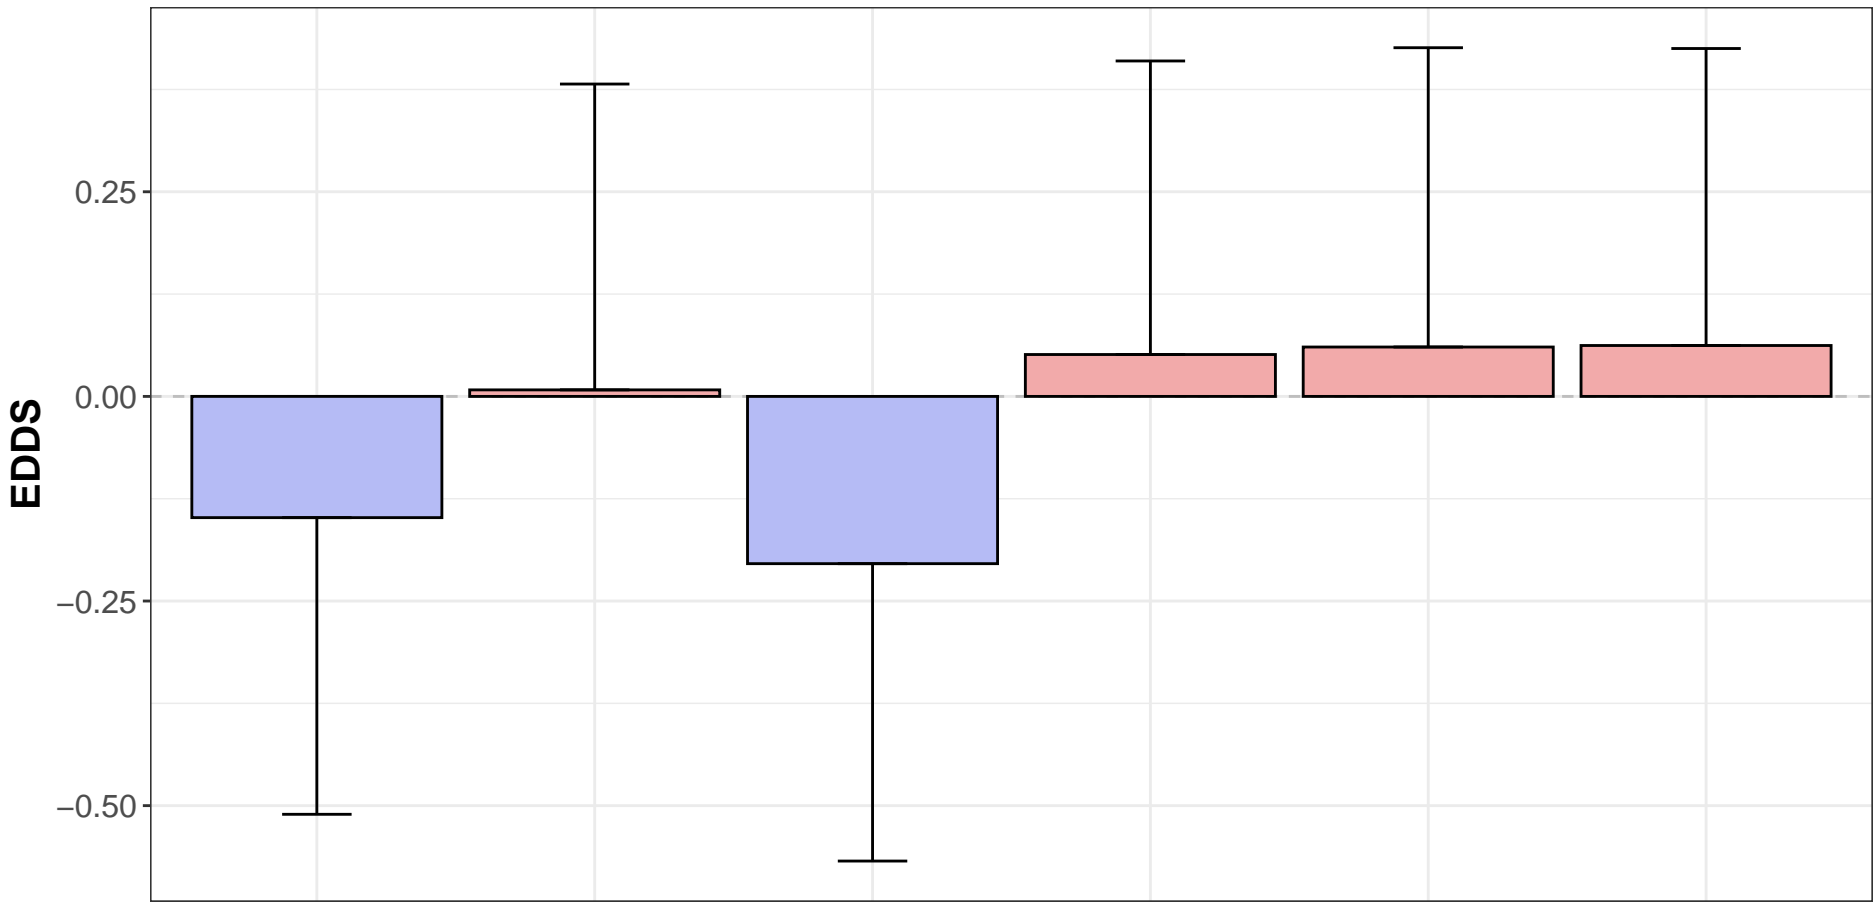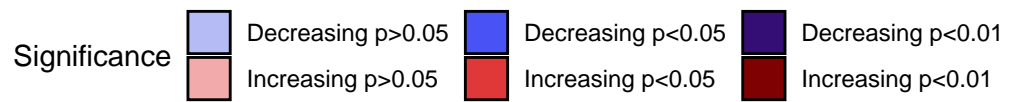



# Phospholipid Metabolism

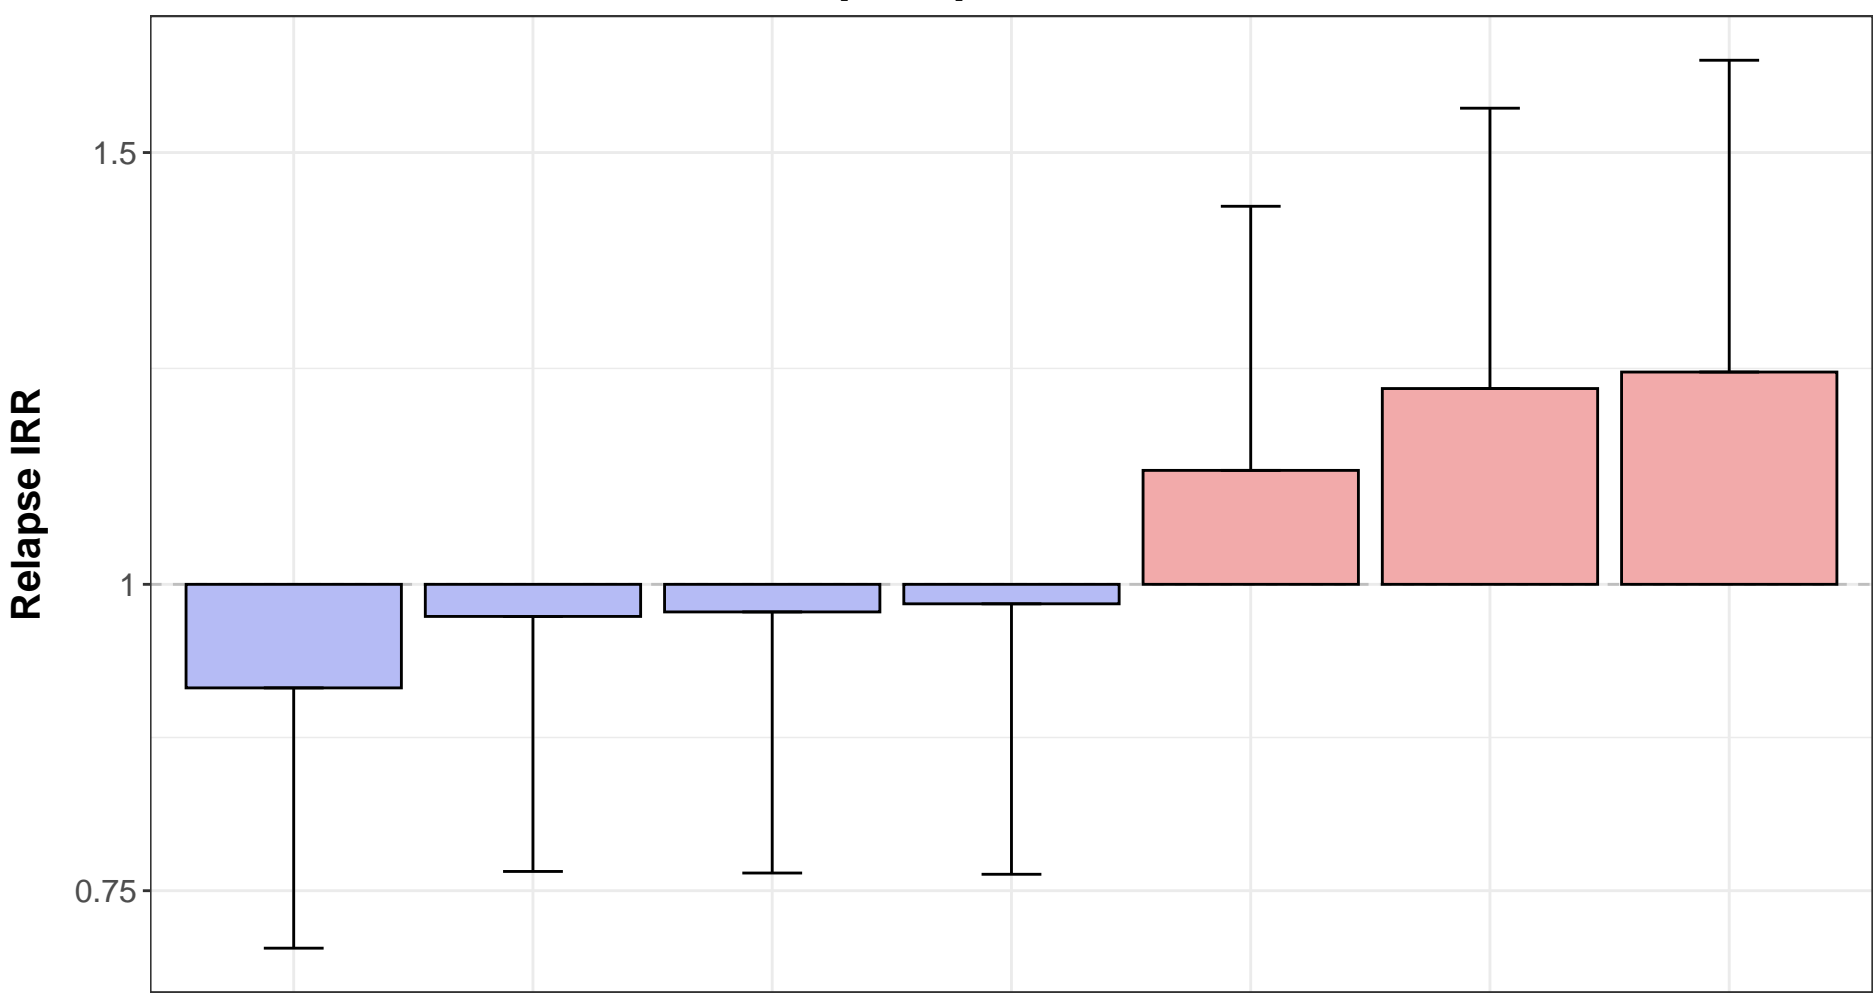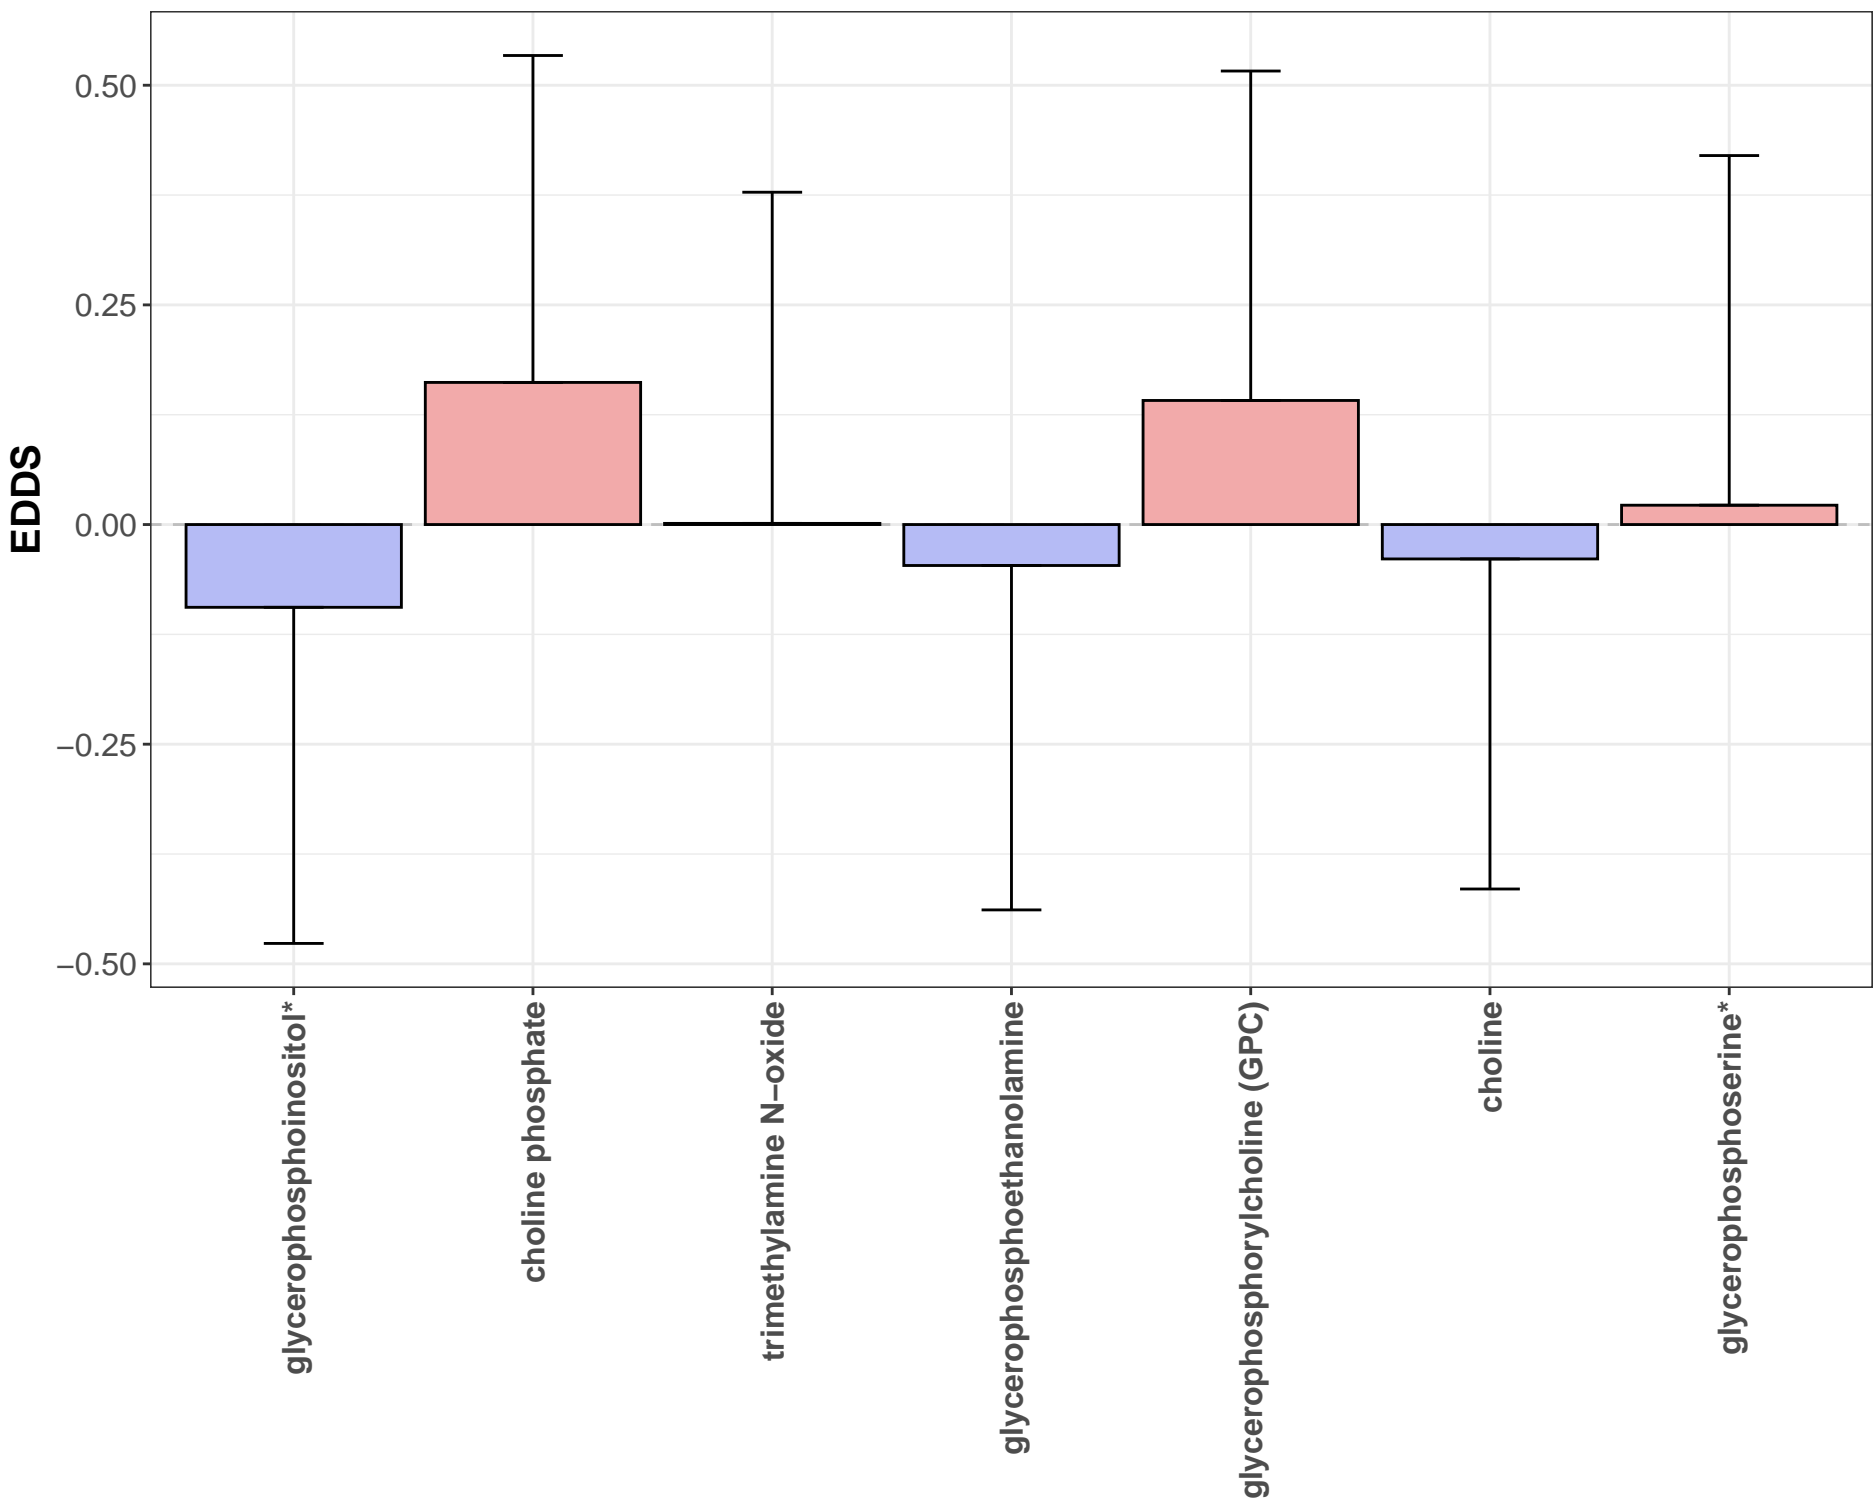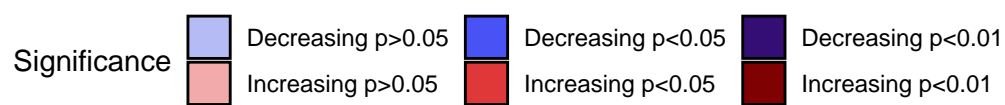

# Plasmalogen

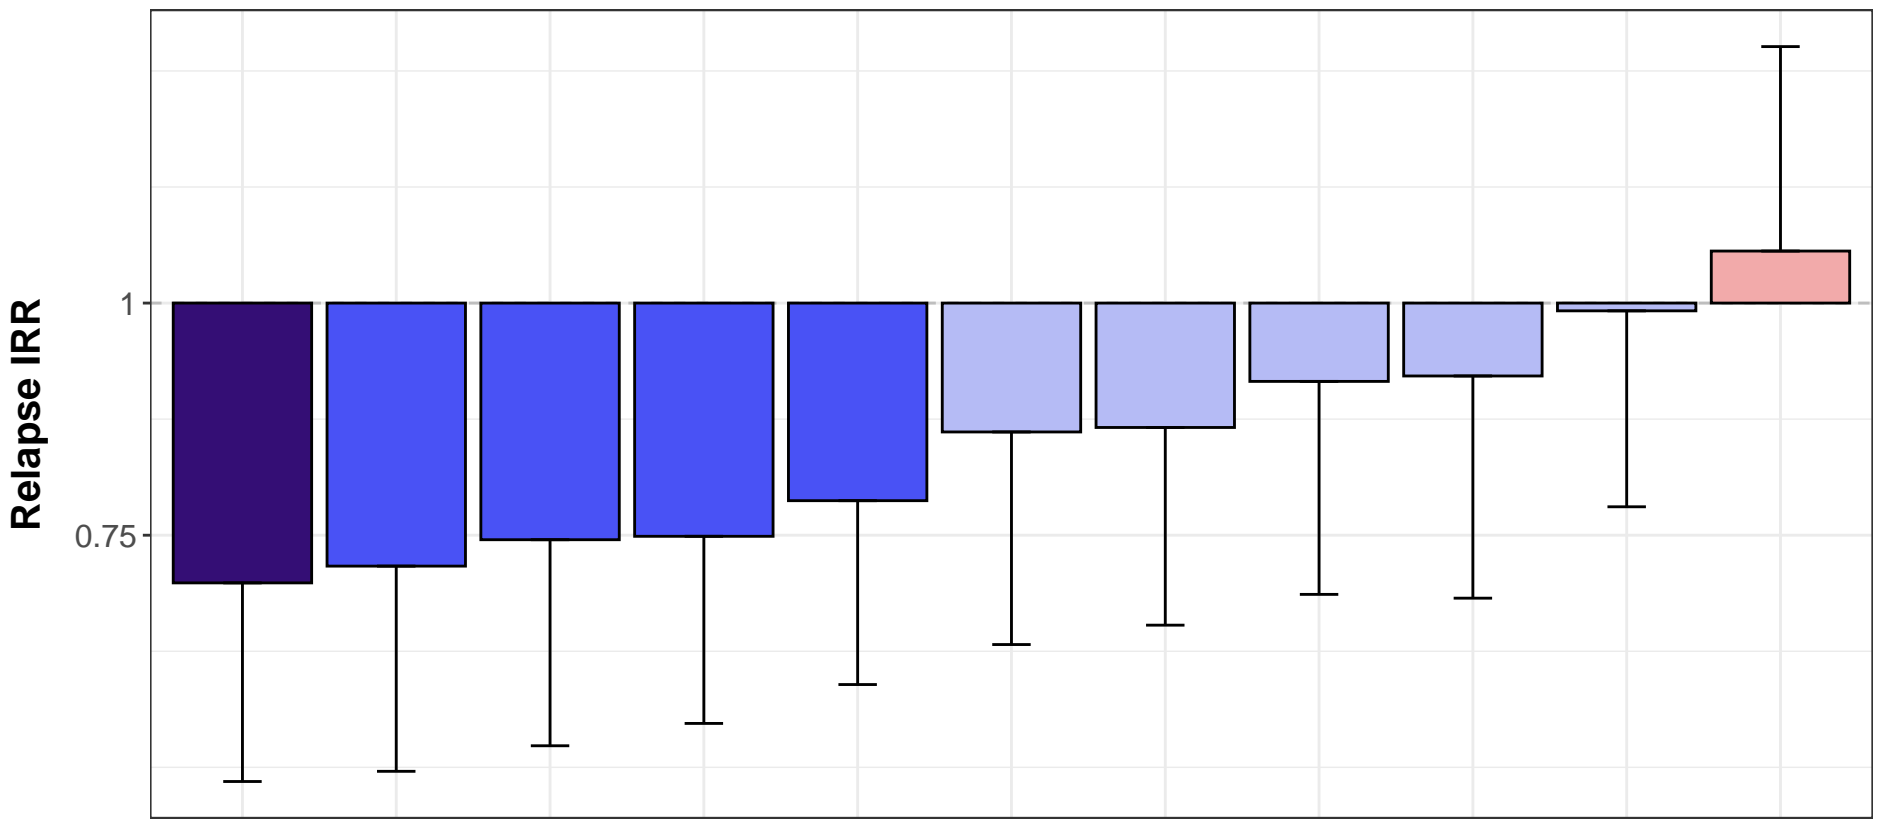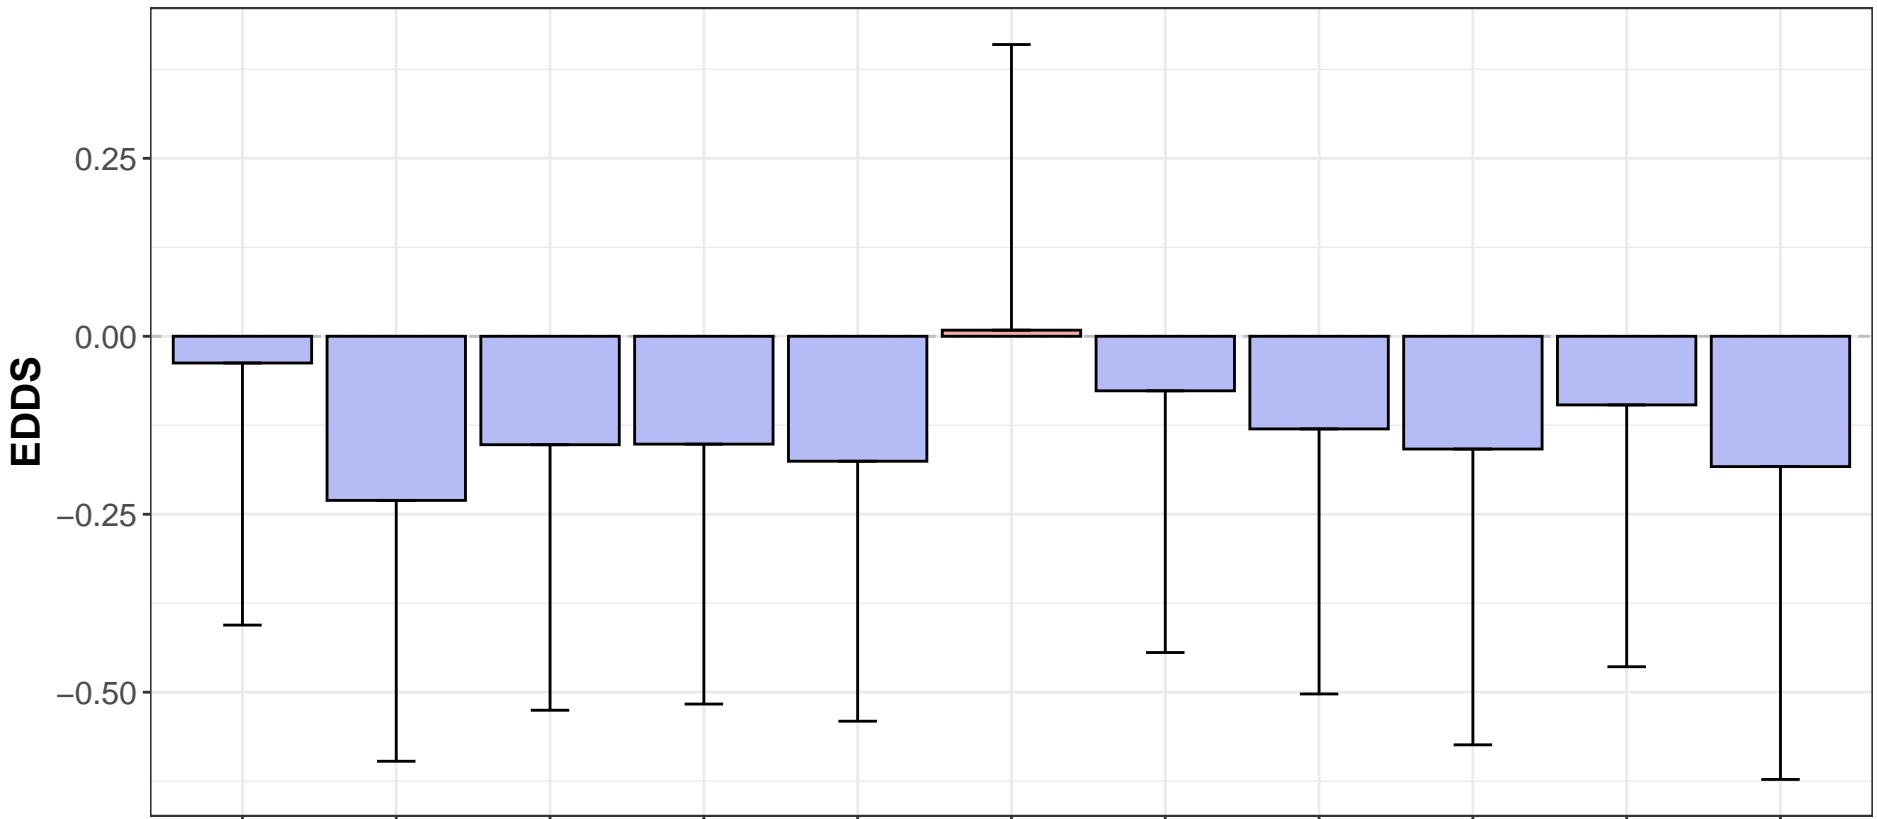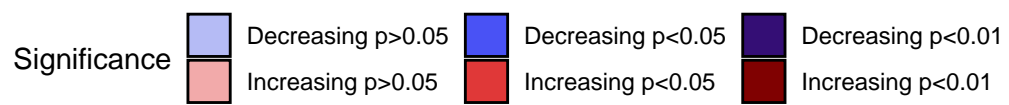

# Polyunsaturated Fatty Acid (n3 and n6)

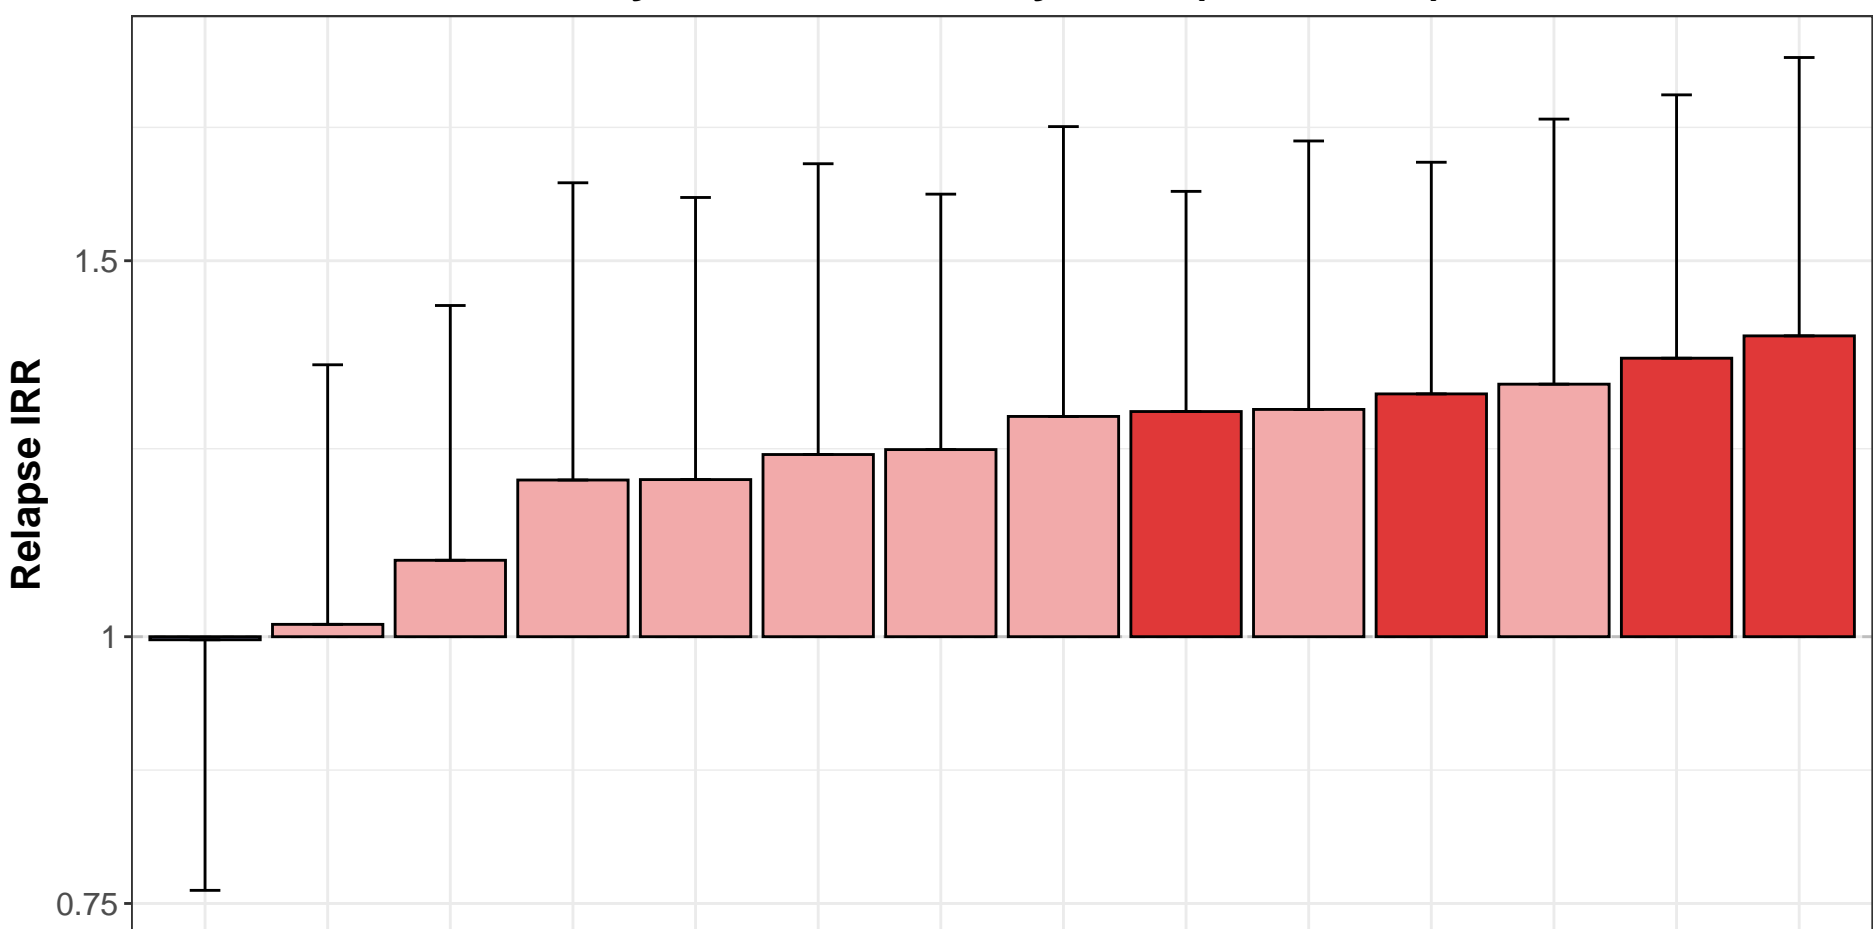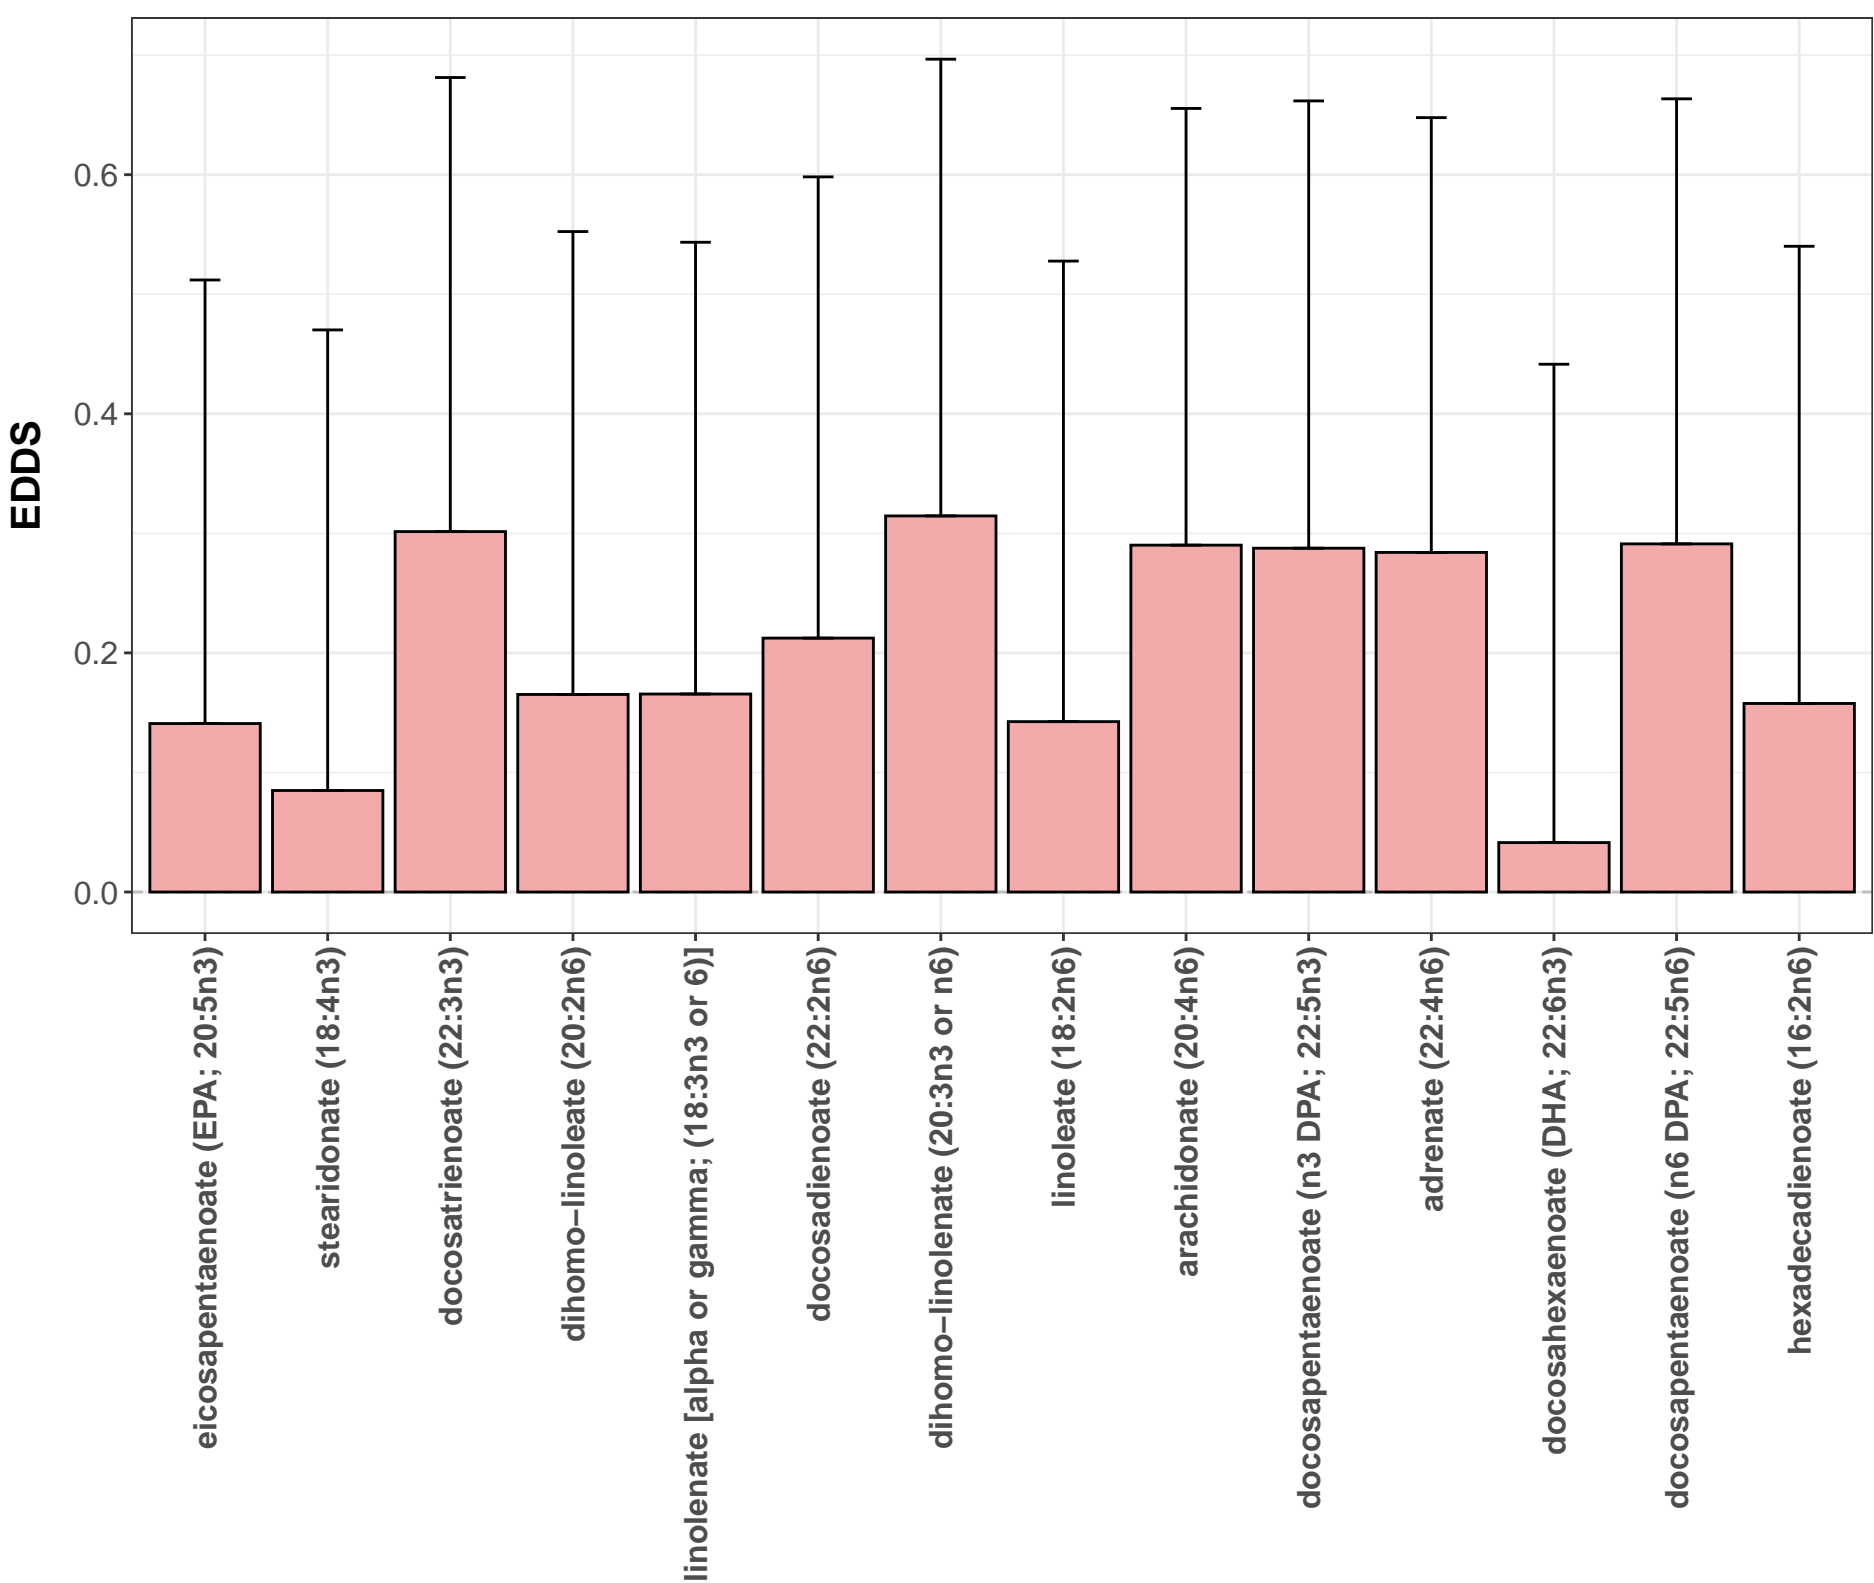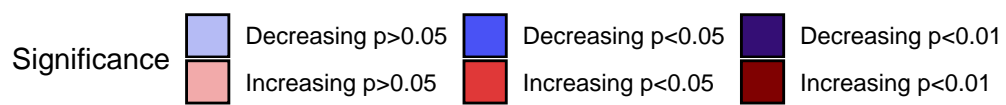

# Pregnenolone Steroids

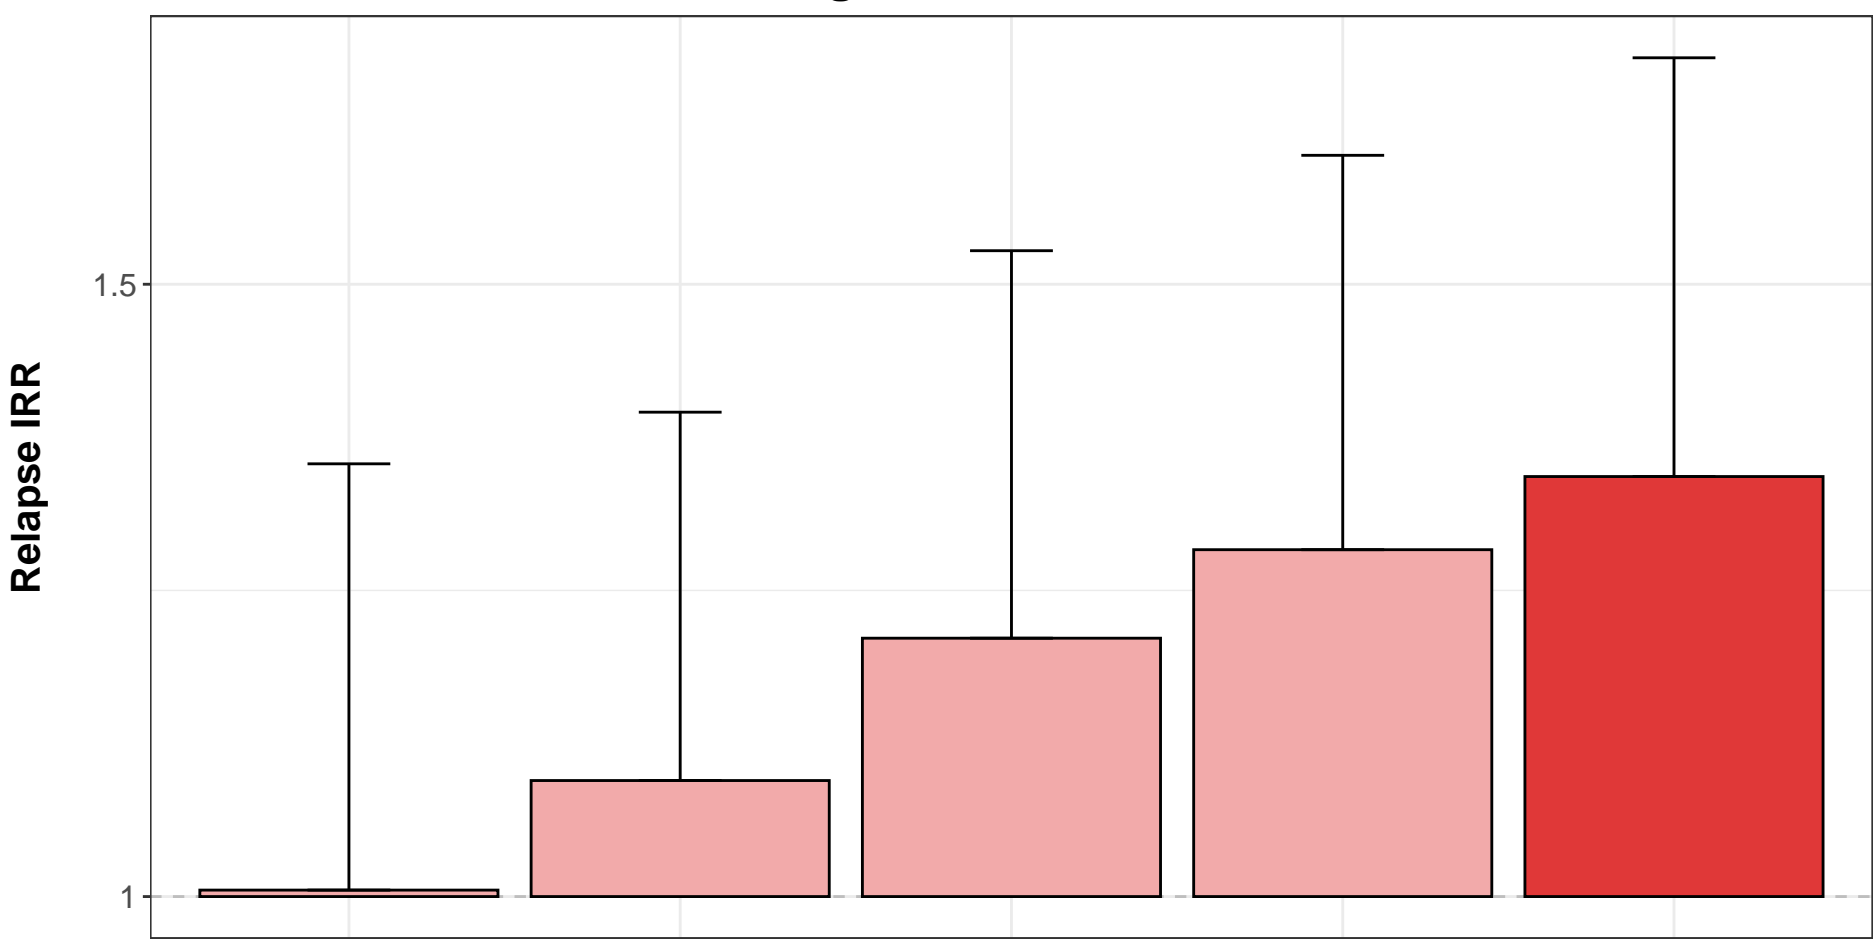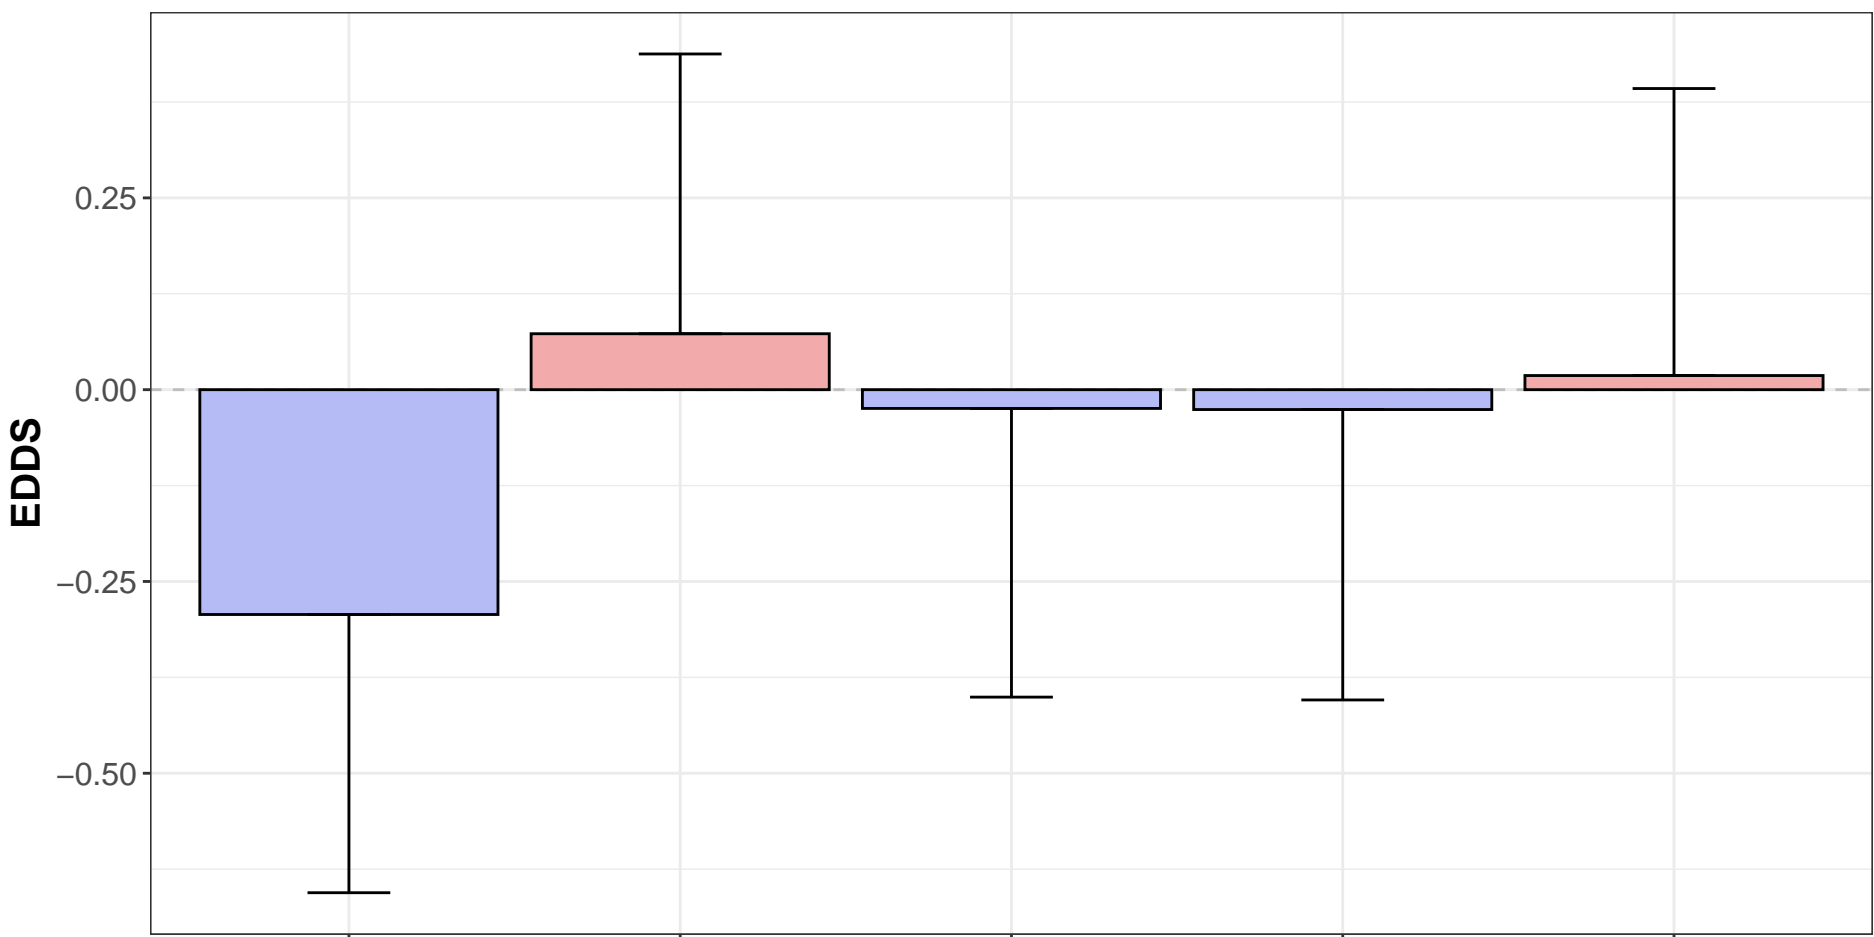

17alpha-hydroxypregnenolone 3-sulfate

pregnenolone sulfate

pregnenediol disulfate (C21H34O8S2)\*

pregnenediol sulfate (C21H34O5S)\*

21-hydroxypregnenolone disulfate

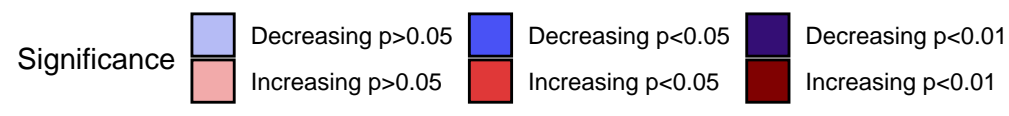

# Primary Bile Acid Metabolism

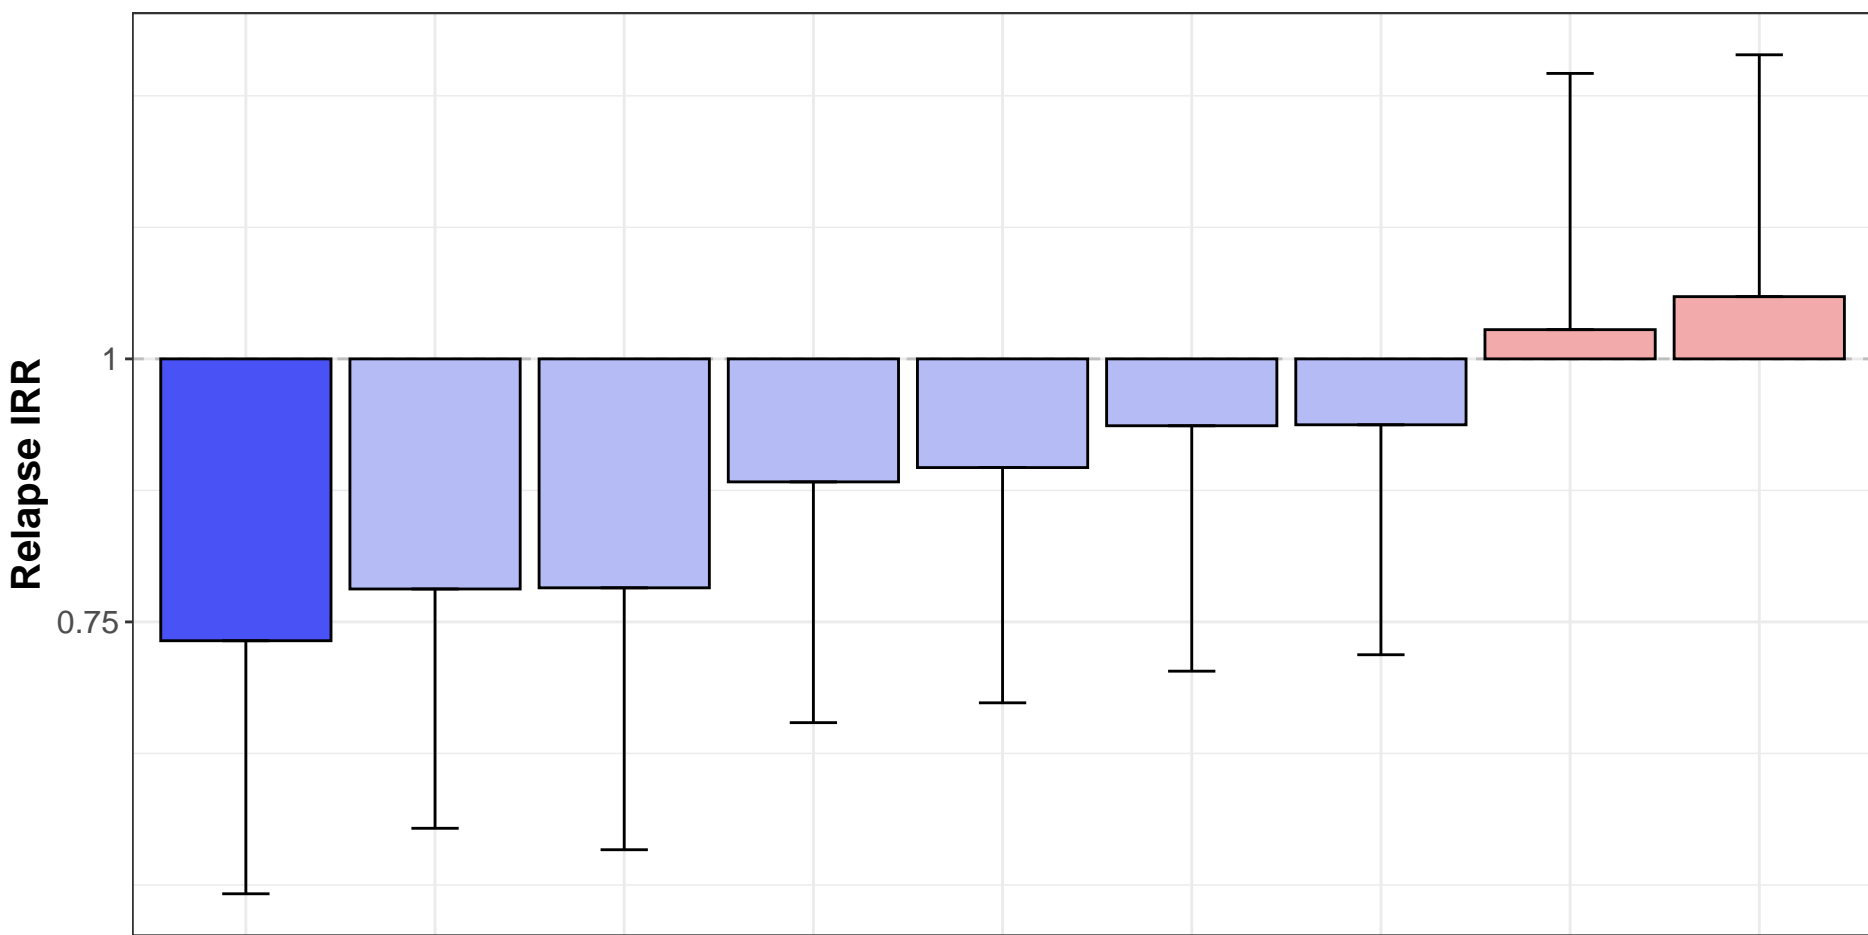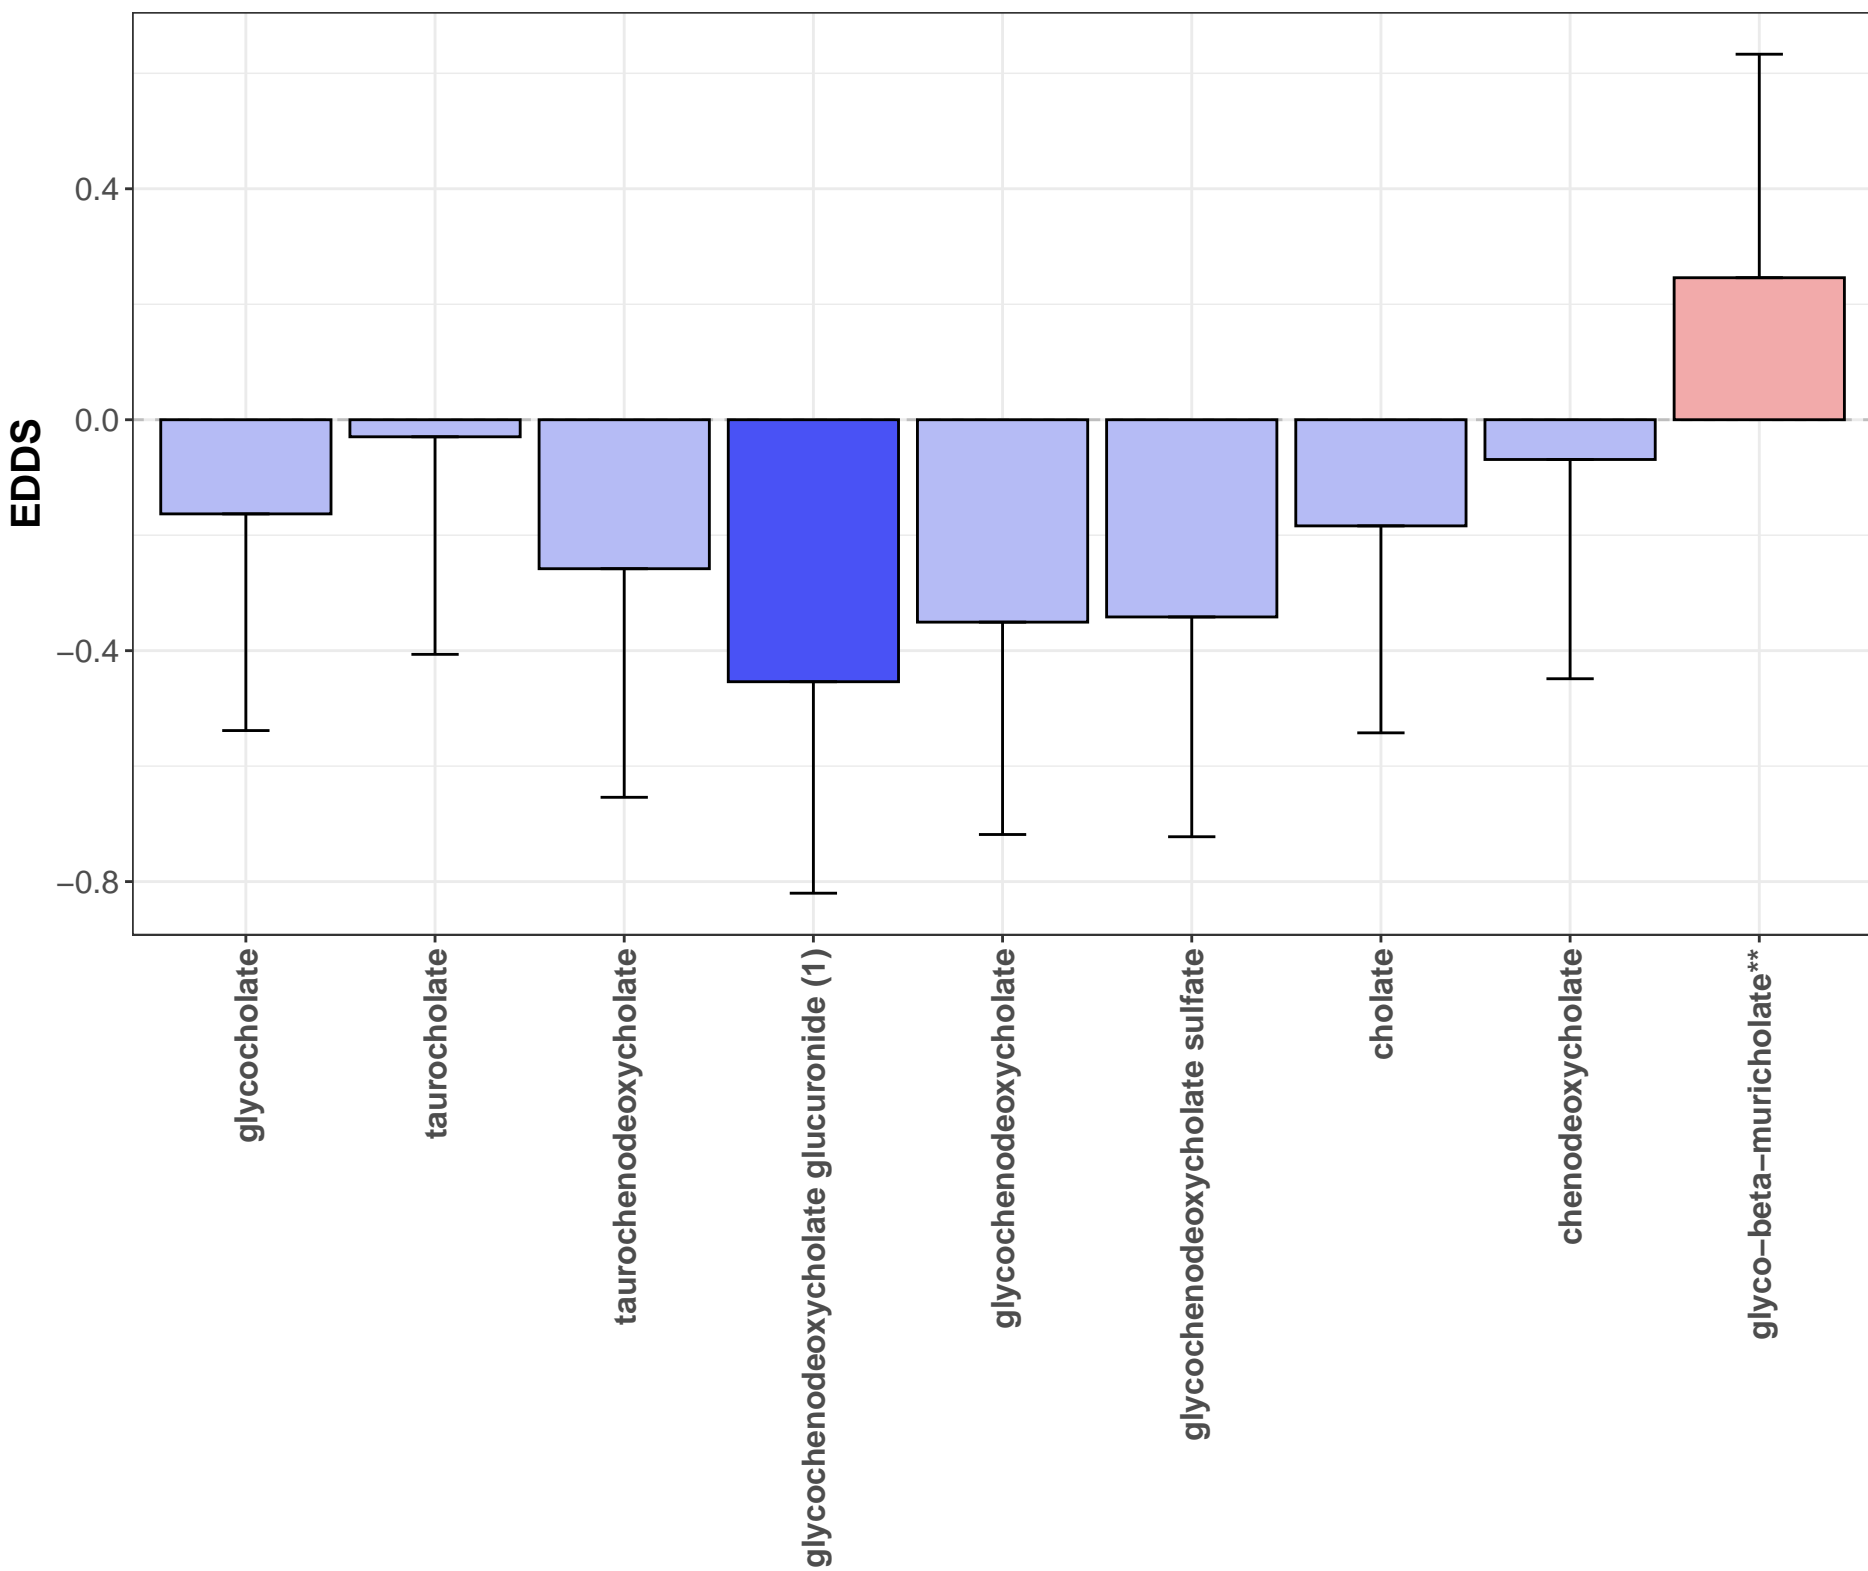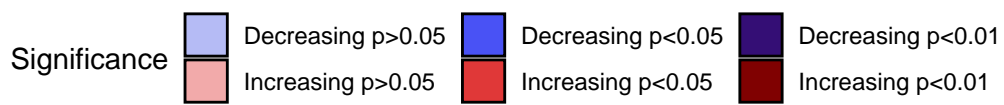

# Progestin Steroids

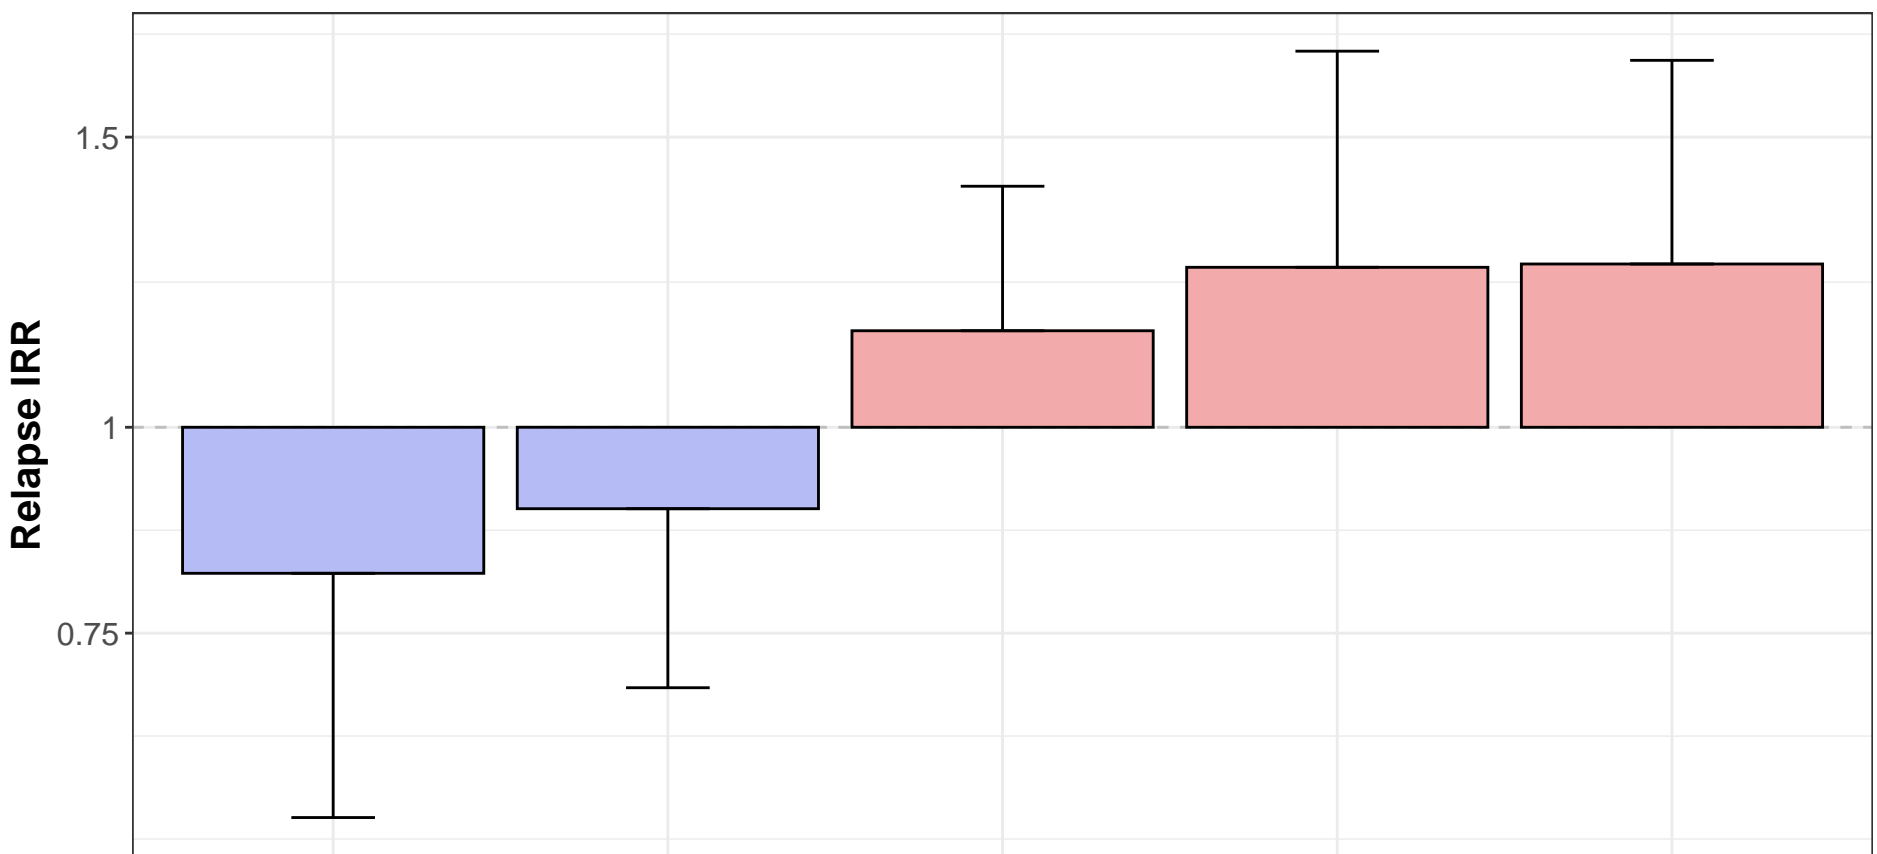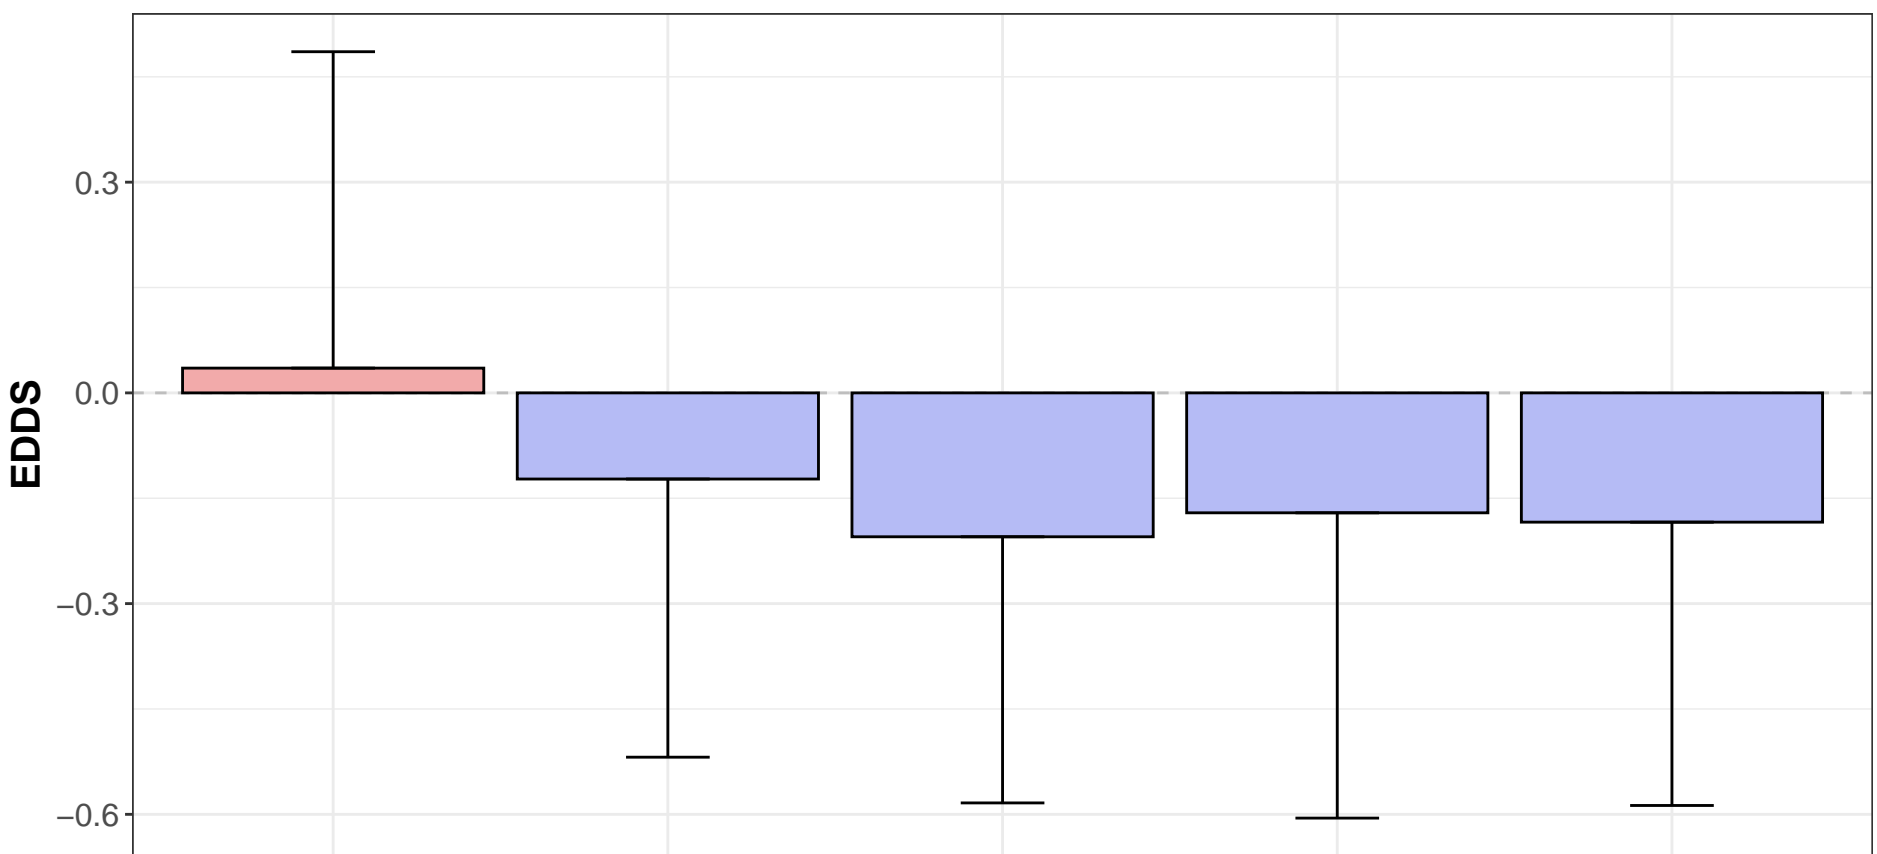

5alpha-pregnan-3,20beta-diol disulfate

pregnane-3,20-diol-3-O-glucuronide

5alpha-pregnan-3beta,20beta-diol monosulfate (1)

5alpha-pregnan-3beta,20alpha-diol monosulfate (2)

5alpha-pregnan-3beta,20alpha-diol disulfate

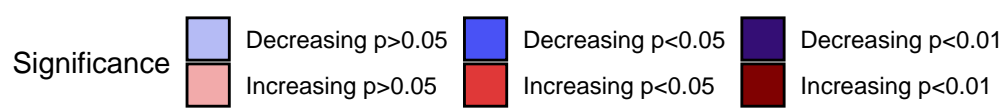

# Secondary Bile Acid Metabolism

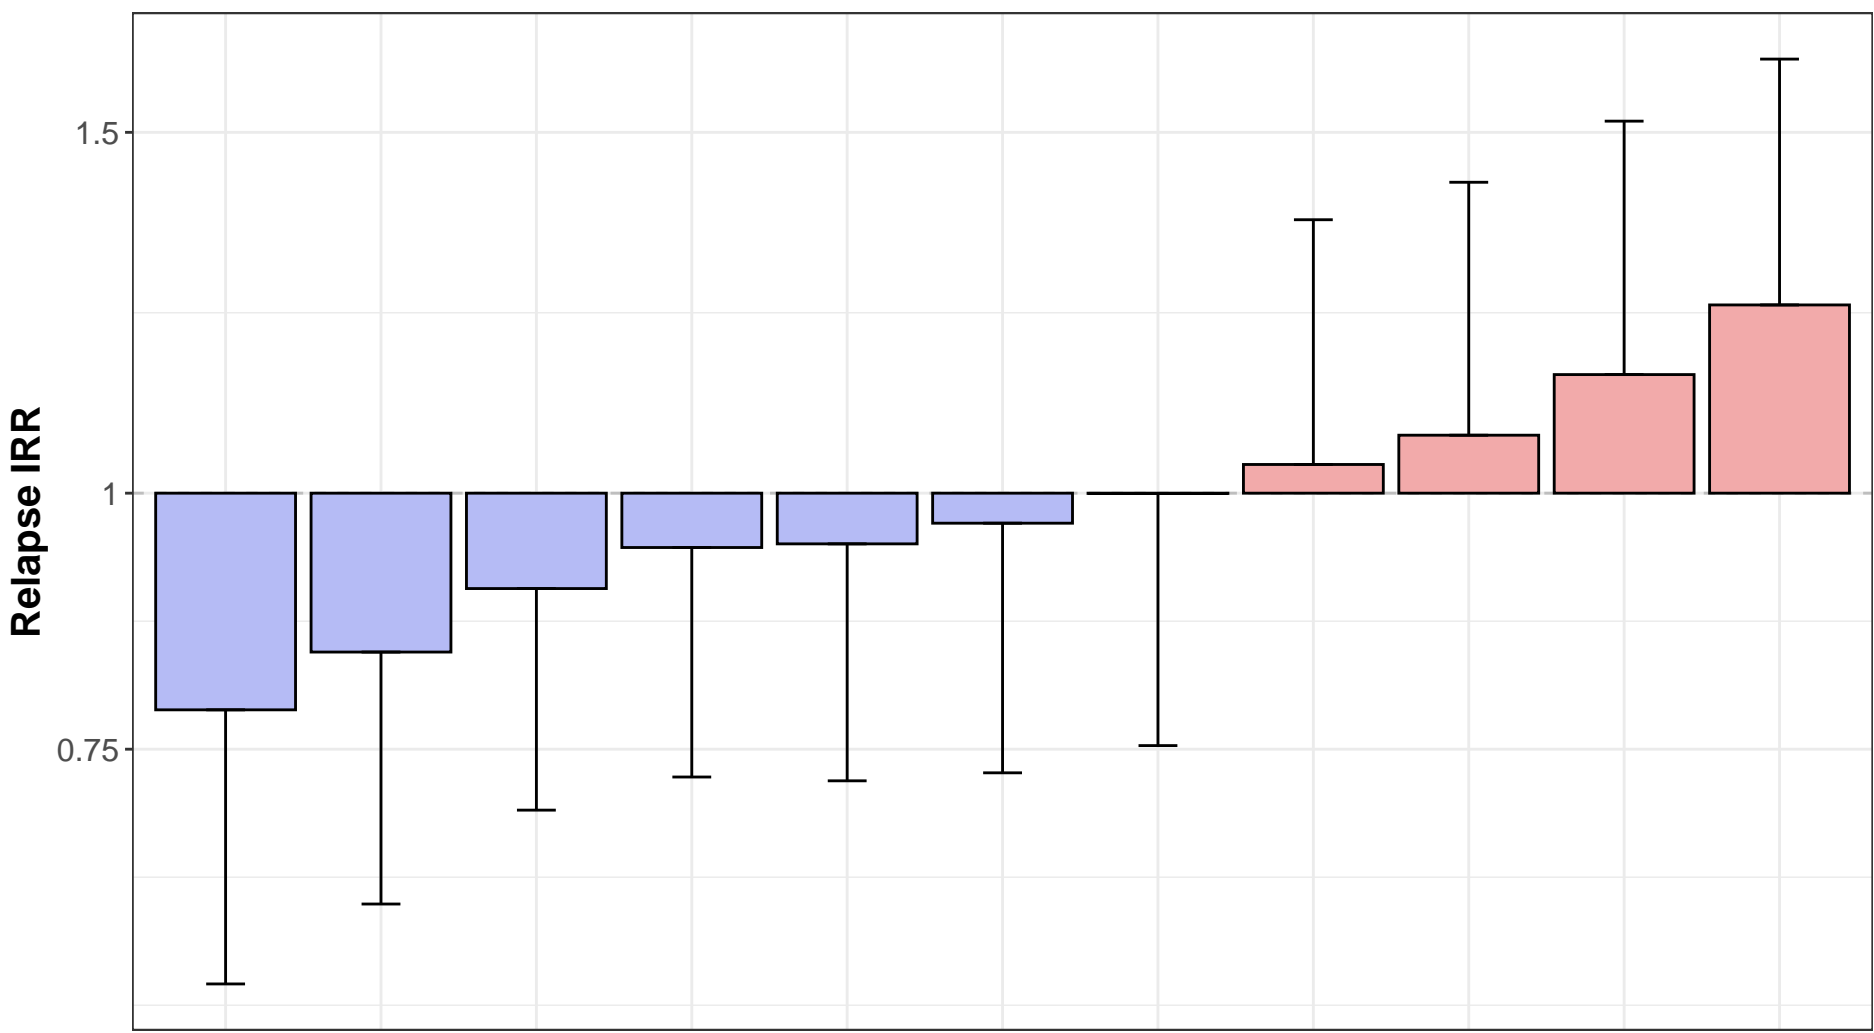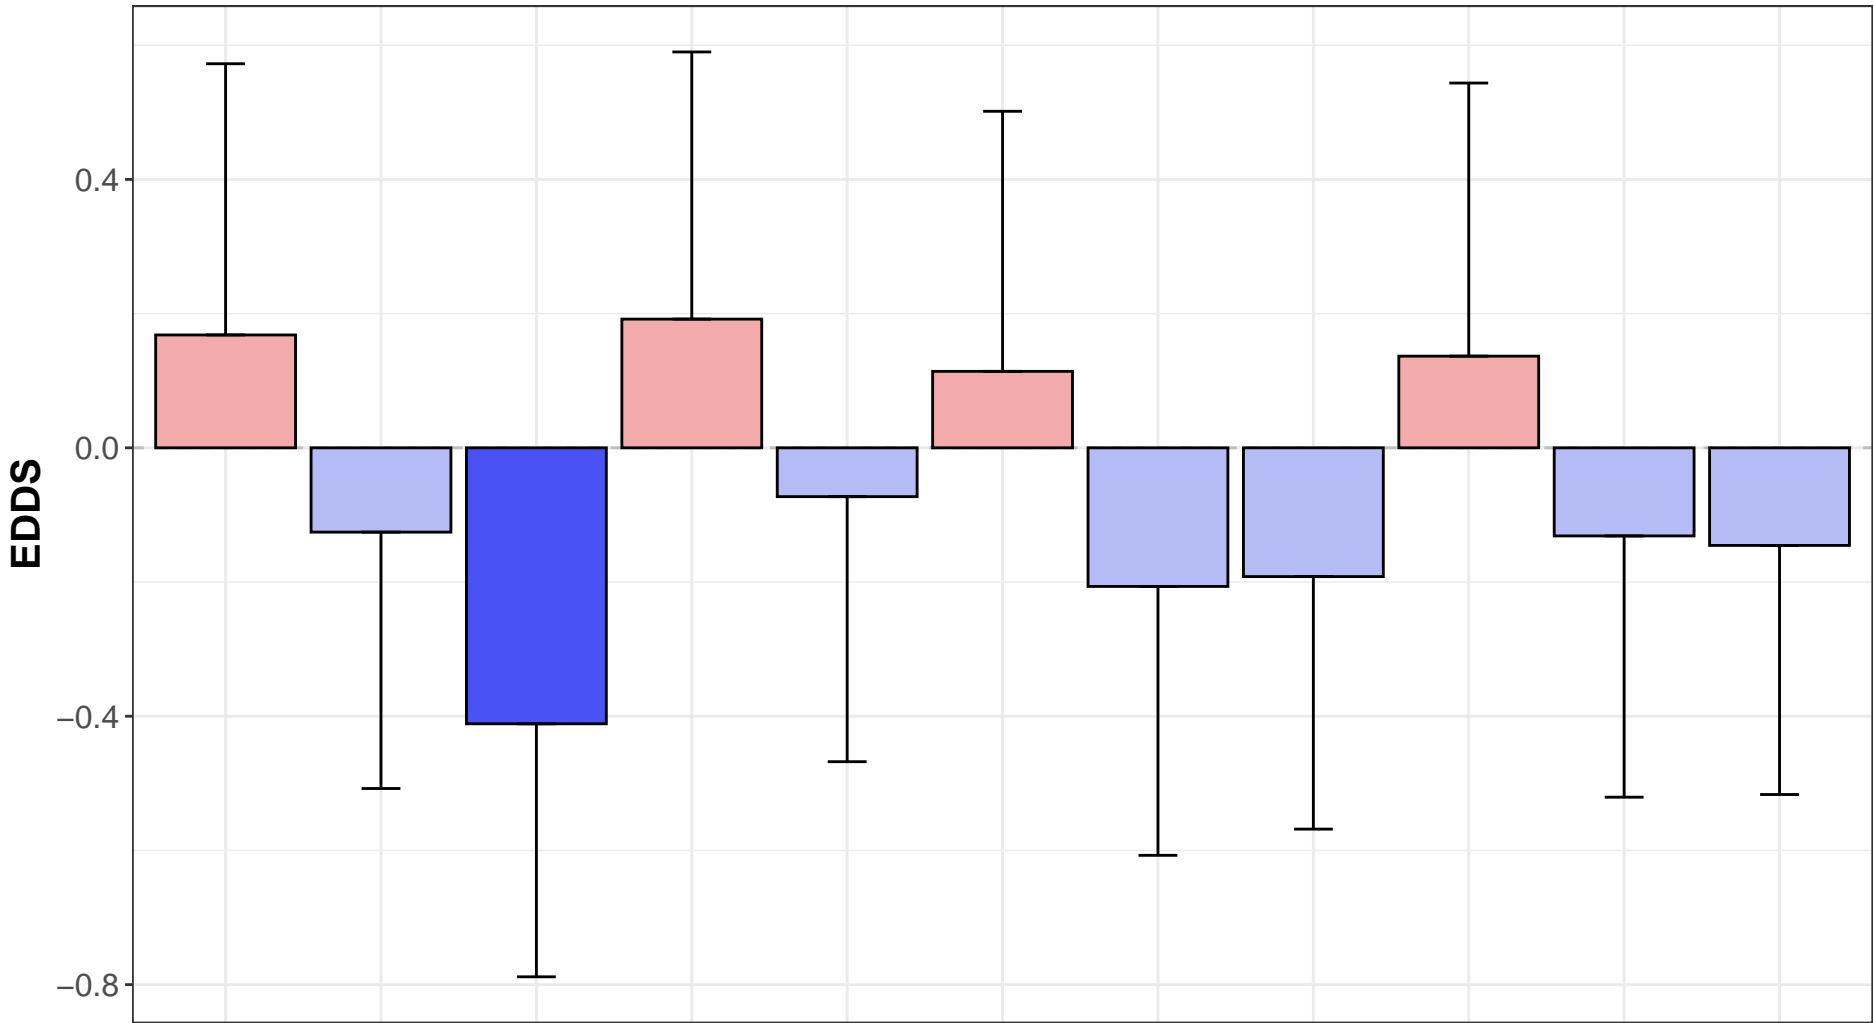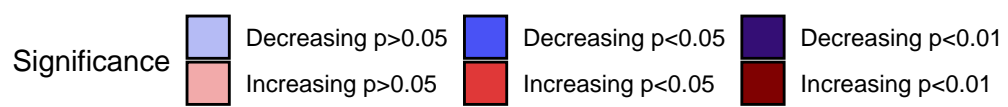

# Spingolipid Metabolism

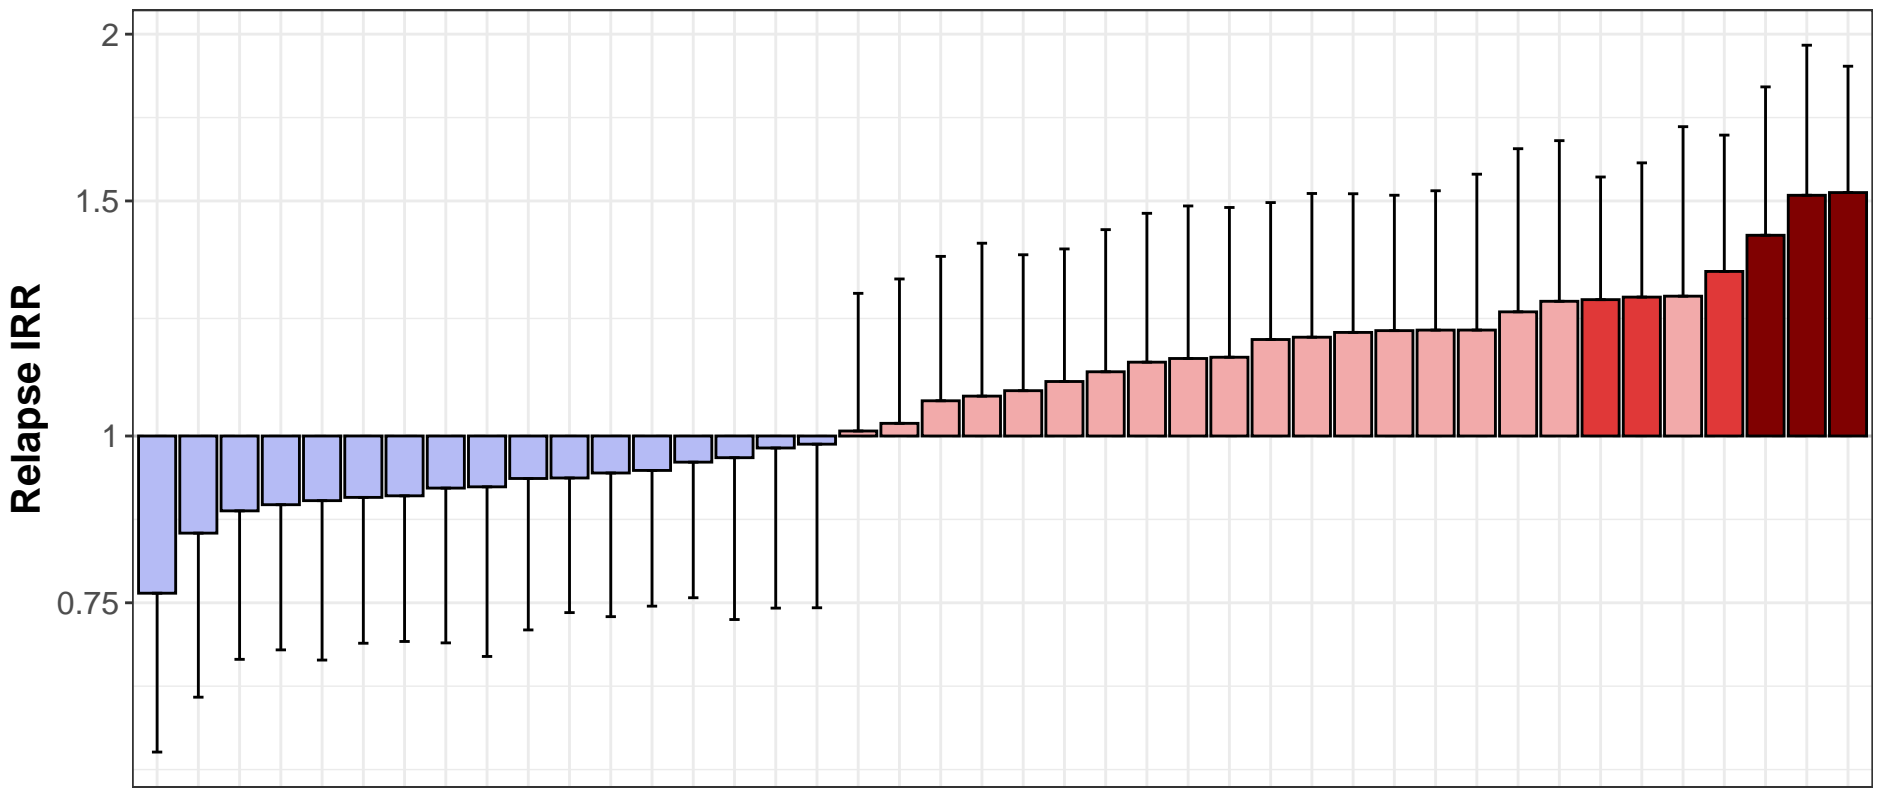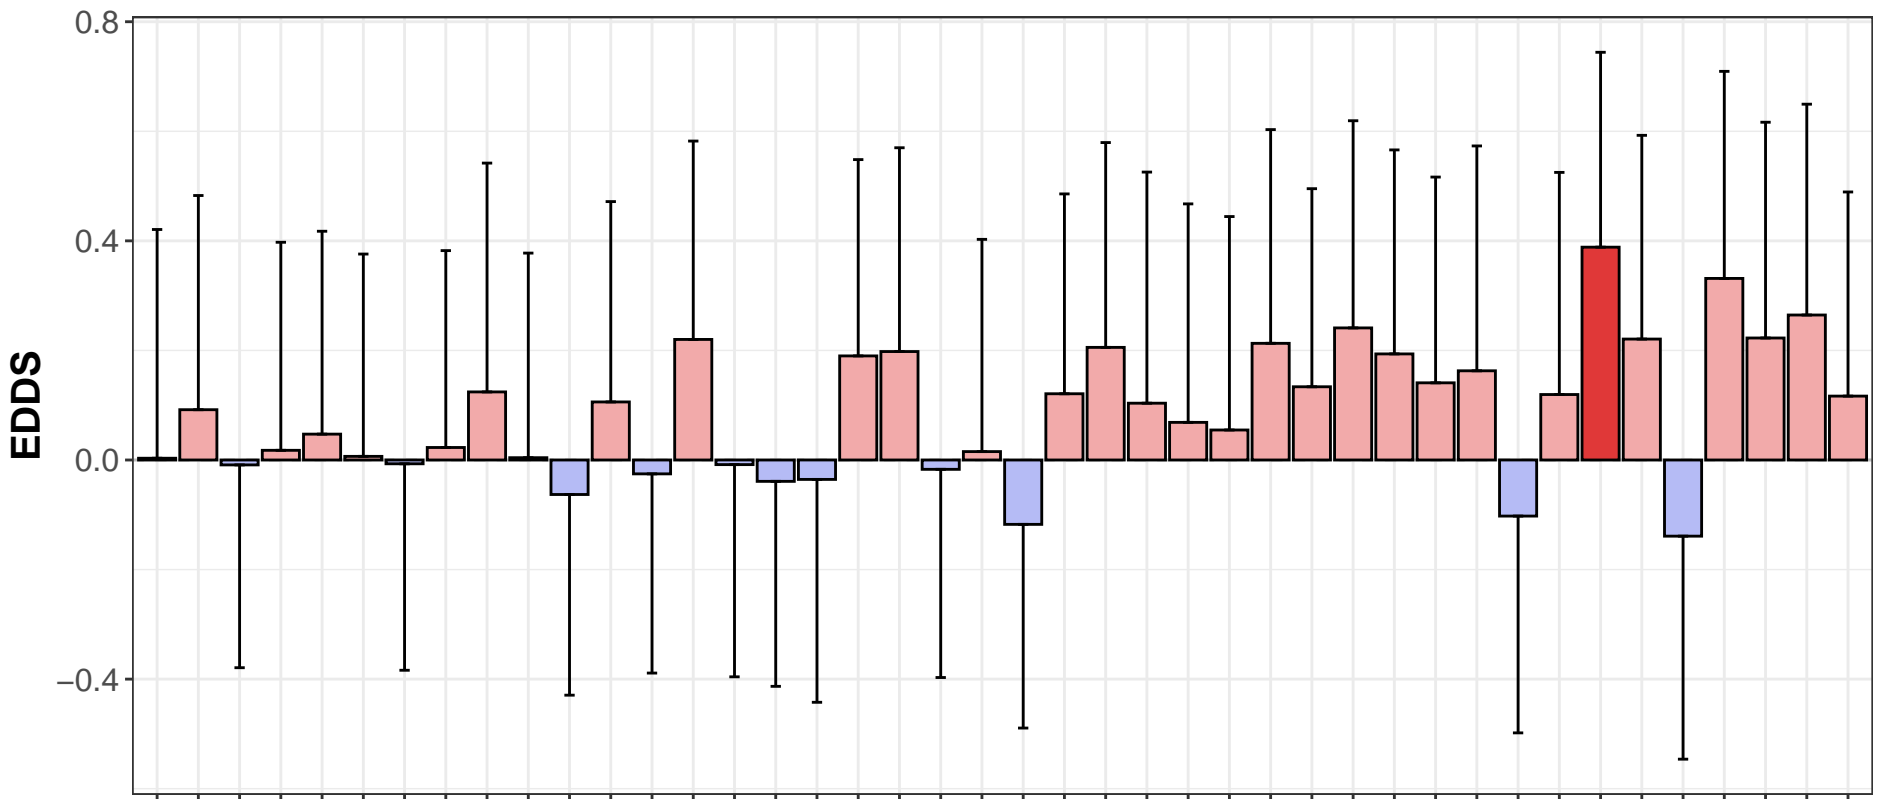

sphingomyelin (d17:2/16:0, d18:2/15:0)\*  
 sphingomyelin (d17:1/14:0, d16:1/15:0)\*  
 sphingomyelin (d18:1/21:0, d17:1/22:0, d16:1/23:0)\*  
 sphingomyelin (d18:2/23:0, d18:1/23:1, d17:1/24:1)\*  
 sphingomyelin (d18:1/14:0, d16:1/16:0)\*  
 behenoyl sphingomyelin (d18:1/22:0)\*  
 sphingomyelin (d18:1/22:1, d18:2/22:0, d16:1/24:1)\*  
 sphingomyelin (d17:1/16:0, d18:1/15:0, d16:1/17:0)\*  
 sphingomyelin (d18:2/14:0, d18:1/14:1)\*  
 palmitoyl sphingomyelin (d18:1/16:0)  
 tricosanoyl sphingomyelin (d18:1/23:0)\*  
 sphingomyelin (d18:1/20:0, d16:1/22:0)\*  
 lignoceroyl sphingomyelin (d18:1/24:0)  
 N-palmitoyl-heptadecasphingosine (d17:1/16:0)\*  
 lactosyl-N-behenoyl-sphingosine (d18:1/22:0)\*  
 palmitoyl dihydrosphingomyelin (d18:0/16:0)\*  
 N-palmitoyl-sphinganine (d18:0/16:0)  
 sphingomyelin (d18:1/24:1, d18:2/24:0)\*  
 myristoyl dihydrosphingomyelin (d18:0/14:0)\*  
 behenoyl dihydrosphingomyelin (d18:0/22:0)\*  
 sphingomyelin (d18:2/16:0, d18:1/16:1)\*  
 sphingomyelin (d18:1/25:0, d19:0/24:1, d20:1/23:0, d19:1/24:0)\*  
 sphingomyelin (d18:0/20:0, d16:0/22:0)\*  
 sphingomyelin (d18:2/24:1, d18:1/24:2)\*  
 sphingomyelin (d18:2/21:0, d16:2/23:0)\*  
 sphinganine-1-phosphate  
 sphingosine 1-phosphate  
 sphingomyelin (d18:2/23:1)\*  
 sphingomyelin (d18:1/17:0, d17:1/18:0, d19:1/16:0)  
 N-palmitoyl-sphingadienine (d18:2/16:0)\*  
 sphingomyelin (d18:0/18:0, d19:0/17:0)\*  
 sphingomyelin (d18:1/19:0, d19:1/18:0)\*  
 sphingomyelin (d18:1/20:1, d18:2/20:0)\*  
 sphinganine  
 sphingomyelin (d18:2/24:2)\*  
 N-stearoyl-sphinganine (d18:0/18:0)\*  
 stearoyl sphingomyelin (d18:1/18:0)  
 sphingosine  
 sphingomyelin (d18:1/18:1, d18:2/18:0)  
 sphingomyelin (d18:1/22:2, d18:2/22:1, d16:1/24:2)\*  
 sphingomyelin (d18:1/20:2, d18:2/20:1, d16:1/22:2)\*  
 sphingomyelin (d18:2/18:1)\*

Significance  
 Decreasing p > 0.05  
 Decreasing p < 0.05  
 Decreasing p < 0.01  
 Increasing p > 0.05  
 Increasing p < 0.05  
 Increasing p < 0.01



# Sterol

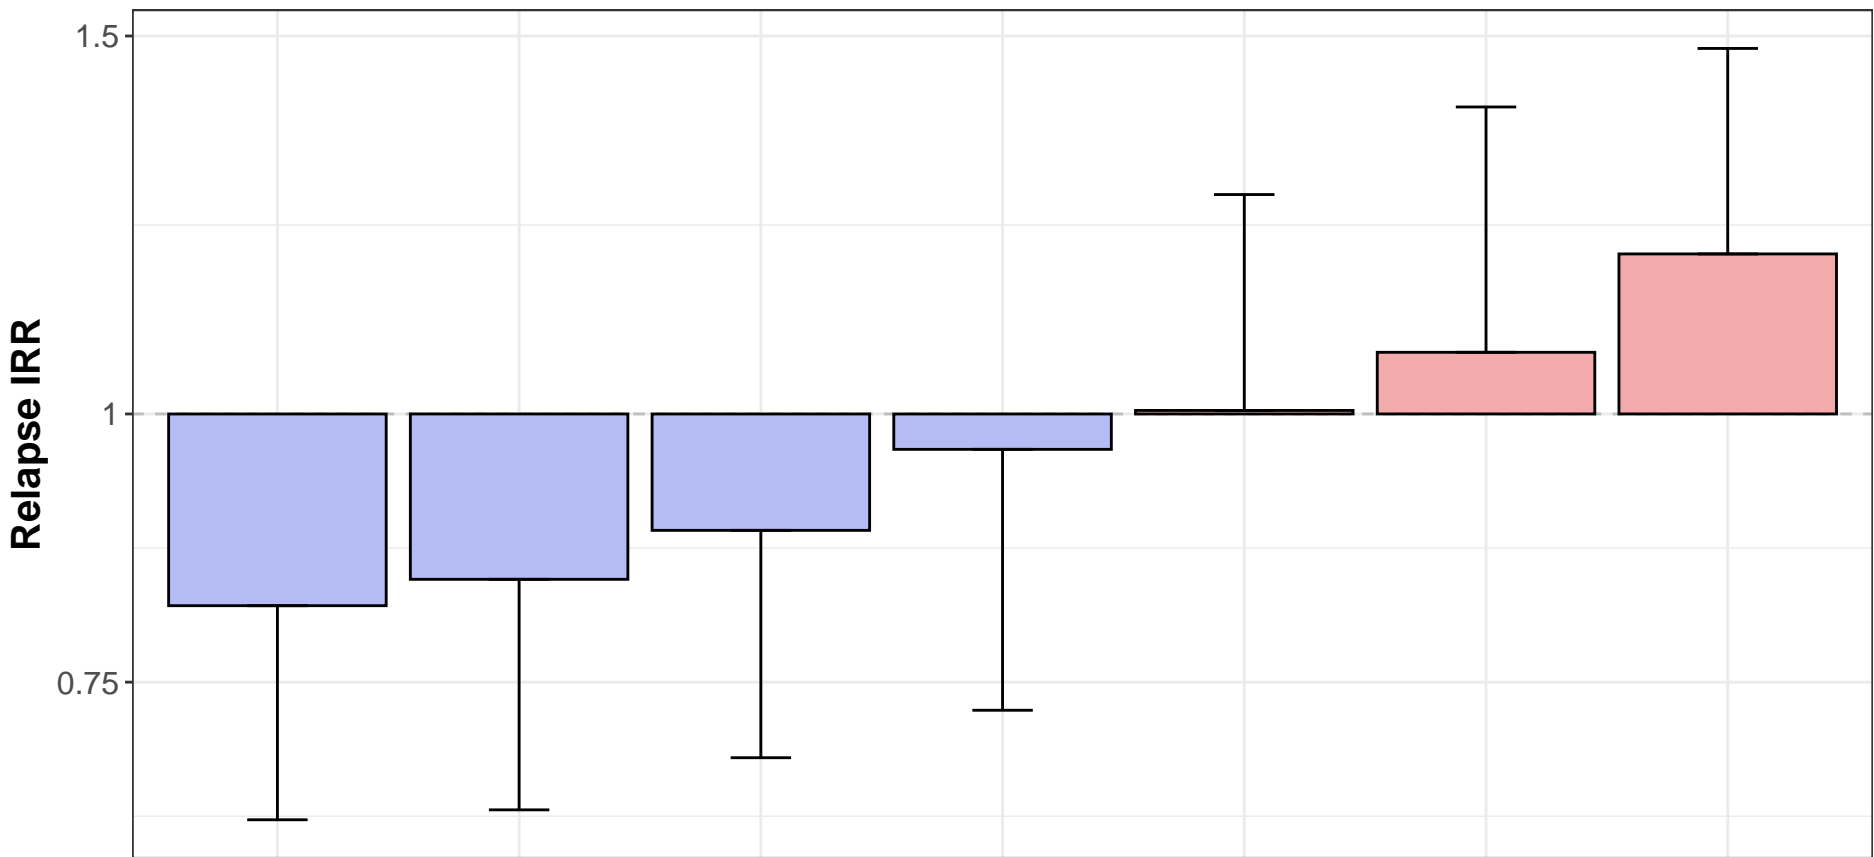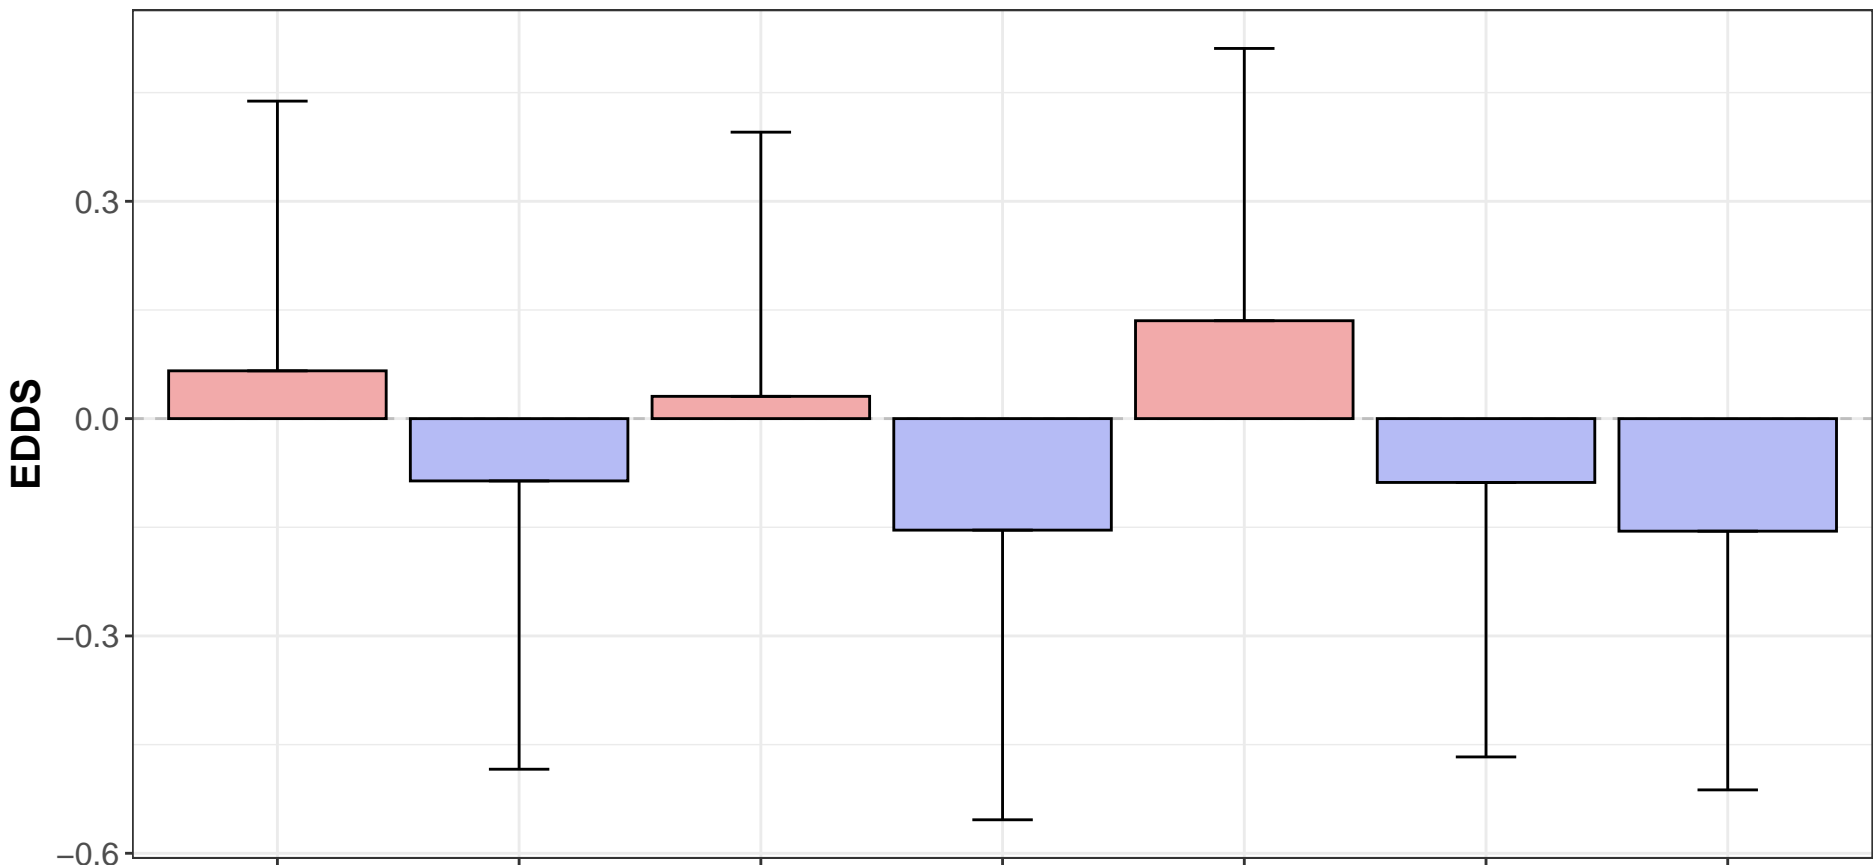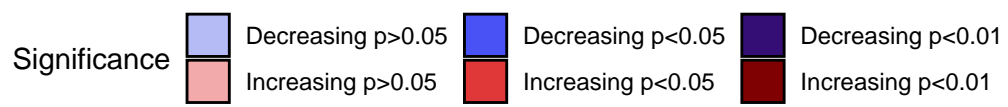

Supplement: NIHMS1890308-supplement-Supplementary_file_all_plots.pdf [file NIHMS1890308-supplement-Supplementary_file_all_plots.pdf]
